# Supplementary material for: Comparative Proteomic and Morphological Change Analyses of Staphylococcus aureus During Resuscitation From Prolonged Freezing
Source: Front Microbiol. 2018 May 3;9:866. doi: 10.3389/fmicb.2018.00866 (PMC5943506; doi:10.3389/fmicb.2018.00866)
Supplement: Supplementary file 2 [file Table_2.XLSX]

## Sheet: proteins
SUPPLEMENTARY TABLE S2 | List of identified proteins between resuscitating S. aureus and freezing survived control.
Protein Group	Protein ID	Accession	Score (%)	-10lgP	Coverage (%)	#Peptides	#Unique	PTM	Avg. Mass	Description
1	1	Q5HIC7|EFTU_STAAC	99.2	375.62	90	190	190	Y	43104	Elongation factor Tu OS=Staphylococcus aureus (strain COL) GN=tuf PE=3 SV=1
3	5	Q5HJF4|PFLB_STAAC	99.2	369.5	80	159	159	Y	84862	Formate acetyltransferase OS=Staphylococcus aureus (strain COL) GN=pflB PE=1 SV=1
2	11	Q5HI63|ADH_STAAC	99.2	354.83	88	151	151	Y	36048	Alcohol dehydrogenase OS=Staphylococcus aureus (strain COL) GN=adh PE=3 SV=1
10	6	Q5HIC8|EFG_STAAC	99.2	315.15	76	70	69	Y	76612	Elongation factor G OS=Staphylococcus aureus (strain COL) GN=fusA PE=3 SV=3
4	13	Q5HHP1|ENO_STAAC	99.2	303.96	79	63	63	Y	47117	Enolase OS=Staphylococcus aureus (strain COL) GN=eno PE=3 SV=1
7	148	Q5HE61|Q5HE61_STAAC	99.1	296.22	96	63	63	Y	16692	Dps family protein OS=Staphylococcus aureus (strain COL) GN=SACOL2131 PE=1 SV=1
29	8	Q5HID2|RPOC_STAAC	99.2	294.67	58	74	74	Y	135408	DNA-directed RNA polymerase subunit beta' OS=Staphylococcus aureus (strain COL) GN=rpoC PE=3 SV=1
13	4	Q5HF76|KPYK_STAAC	99.2	292.99	65	48	48	Y	63102	Pyruvate kinase OS=Staphylococcus aureus (strain COL) GN=pyk PE=3 SV=1
18	38	Q5HHC2|G6PI_STAAC	99.2	289.28	71	54	54	Y	49808	Glucose-6-phosphate isomerase OS=Staphylococcus aureus (strain COL) GN=pgi PE=1 SV=1
11	24	Q5HCR3|OTCC_STAAC	99.2	287.94	77	54	51	Y	37763	Ornithine carbamoyltransferase catabolic OS=Staphylococcus aureus (strain COL) GN=arcB PE=3 SV=1
19	17	Q5HFU7|RS1_STAAC	99.2	280.65	74	41	40	Y	43287	30S ribosomal protein S1 OS=Staphylococcus aureus (strain COL) GN=rpsA PE=3 SV=1
12	28	Q5HF97|TIG_STAAC	99.2	280.12	67	44	44	Y	48609	Trigger factor OS=Staphylococcus aureus (strain COL) GN=tig PE=3 SV=1
15	37	Q5HGZ0|ODPB_STAAC	99.2	279.8	78	55	55	Y	35216	Pyruvate dehydrogenase E1 component subunit beta OS=Staphylococcus aureus (strain COL) GN=pdhB PE=3 SV=1
20	3	Q5HE97|ATPB_STAAC	99.2	279.28	74	45	45	Y	51400	ATP synthase subunit beta OS=Staphylococcus aureus (strain COL) GN=atpD PE=3 SV=1
14	2	Q5HCR2|ARCA_STAAC	99.2	278.48	78	47	47	Y	46915	Arginine deiminase OS=Staphylococcus aureus (strain COL) GN=arcA PE=3 SV=1
42	7	Q5HG77|TKT_STAAC	99.2	278.47	68	48	48	Y	72251	Transketolase OS=Staphylococcus aureus (strain COL) GN=tkt PE=3 SV=1
5	221	Q5HID5|RL7_STAAC	99.1	276.04	79	63	63	Y	12712	50S ribosomal protein L7/L12 OS=Staphylococcus aureus (strain COL) GN=rplL PE=3 SV=1
28	12	Q5HFI0|DNAK_STAAC	99.2	275.49	71	48	48	Y	66361	Chaperone protein DnaK OS=Staphylococcus aureus (strain COL) GN=dnaK PE=3 SV=1
9	32	Q5HGH4|EFTS_STAAC	99.2	275.17	74	42	42	Y	32494	Elongation factor Ts OS=Staphylococcus aureus (strain COL) GN=tsf PE=3 SV=1
26	9	Q5HF90|SYT_STAAC	99.2	274.29	51	44	44	Y	74460	Threonine--tRNA ligase OS=Staphylococcus aureus (strain COL) GN=thrS PE=3 SV=1
55	10	Q5HF63|ACKA_STAAC	99.2	270.98	74	36	36	Y	44043	Acetate kinase OS=Staphylococcus aureus (strain COL) GN=ackA PE=3 SV=1
31	20	Q5HCU5|MQO2_STAAC	99.2	270.39	63	37	37	Y	55999	Probable malate:quinone oxidoreductase 2 OS=Staphylococcus aureus (strain COL) GN=mqo2 PE=3 SV=1
22	29	Q5HGY8|DLDH_STAAC	99.2	268.93	60	36	36	Y	49451	Dihydrolipoyl dehydrogenase OS=Staphylococcus aureus (strain COL) GN=pdhD PE=3 SV=1
16	44	Q5HEH9|LUKL2_STAAC	99.2	263.74	51	39	39	Y	40434	Uncharacterized leukocidin-like protein 2 OS=Staphylococcus aureus (strain COL) GN=SACOL2006 PE=2 SV=1
69	23	Q5HEH2|CH60_STAAC	99.2	262.98	55	34	34	Y	57630	60 kDa chaperonin OS=Staphylococcus aureus (strain COL) GN=groL PE=3 SV=1
41	54	Q5HGY9|ODP2_STAAC	99.2	260.99	66	36	36	Y	46382	Dihydrolipoyllysine-residue acetyltransferase component of pyruvate dehydrogenase complex OS=Staphylococcus aureus (strain COL) GN=pdhC PE=3 SV=1
36	31	Q5HE95|ATPA_STAAC	99.2	259.15	62	29	29	Y	54570	ATP synthase subunit alpha OS=Staphylococcus aureus (strain COL) GN=atpA PE=3 SV=1
30	46	P21224|LUKL1_STAAC	99.2	258.73	59	36	36	Y	38686	Uncharacterized leukocidin-like protein 1 OS=Staphylococcus aureus (strain COL) GN=SACOL2004 PE=2 SV=3
62	18	Q5HID3|RPOB_STAAC	99.2	258.14	51	56	56	Y	133274	DNA-directed RNA polymerase subunit beta OS=Staphylococcus aureus (strain COL) GN=rpoB PE=3 SV=1
6	74	Q5HHP5|G3P1_STAAC	99.2	258.07	81	44	44	Y	36281	Glyceraldehyde-3-phosphate dehydrogenase 1 OS=Staphylococcus aureus (strain COL) GN=gapA1 PE=3 SV=1
8	289	Q5HFV0|DBH_STAAC	99	253.48	73	28	28	Y	9626	DNA-binding protein HU OS=Staphylococcus aureus (strain COL) GN=hup PE=3 SV=1
63	14	P0C281|CLPC_STAAC	99.2	251.92	59	42	40	Y	91037	ATP-dependent Clp protease ATP-binding subunit ClpC OS=Staphylococcus aureus (strain COL) GN=clpC PE=3 SV=1
51	48	Q5HI88|PTAS_STAAC	99.2	251.29	79	35	35	Y	34952	Phosphate acetyltransferase OS=Staphylococcus aureus (strain COL) GN=pta PE=3 SV=1
66	30	Q5HI60|SYR_STAAC	99.2	248.88	53	30	30	Y	62381	Arginine--tRNA ligase OS=Staphylococcus aureus (strain COL) GN=argS PE=3 SV=1
21	146	Q5HEN0|FTN_STAAC	99.2	248.63	66	37	37	Y	19589	Ferritin OS=Staphylococcus aureus (strain COL) GN=ftnA PE=3 SV=1
38	50	Q5HHH2|Q5HHH2_STAAC	99.2	248.41	85	41	41	Y	28275	FeS assembly ATPase SufC OS=Staphylococcus aureus (strain COL) GN=SACOL0914 PE=3 SV=1
25	95	Q5HDD9|GPMA_STAAC	99.2	247.79	90	33	33	Y	26680	2 3-bisphosphoglycerate-dependent phosphoglycerate mutase OS=Staphylococcus aureus (strain COL) GN=gpmA PE=3 SV=1
27	66	Q5HHP4|PGK_STAAC	99.2	246.25	55	25	25	Y	42602	Phosphoglycerate kinase OS=Staphylococcus aureus (strain COL) GN=pgk PE=3 SV=1
37	68	Q5HGZ1|ODPA_STAAC	99.2	245.53	63	34	34	Y	41383	Pyruvate dehydrogenase E1 component subunit alpha OS=Staphylococcus aureus (strain COL) GN=pdhA PE=3 SV=1
47	51	Q5HCV0|LDH2_STAAC	99.2	245.26	66	30	29	Y	34420	L-lactate dehydrogenase 2 OS=Staphylococcus aureus (strain COL) GN=ldh2 PE=1 SV=1
48	15	Q5HGG2|IF2_STAAC	99.2	245.02	43	30	30	Y	77871	Translation initiation factor IF-2 OS=Staphylococcus aureus (strain COL) GN=infB PE=3 SV=1
98	16	Q5HD02|CLPL_STAAC	99.2	244.43	53	34	33	Y	77836	ATP-dependent Clp protease ATP-binding subunit ClpL OS=Staphylococcus aureus (strain COL) GN=clpL PE=3 SV=1
17	120	Q5HF64|Y1759_STAAC	99.2	243.21	80	32	32	Y	18475	Putative universal stress protein SACOL1759 OS=Staphylococcus aureus (strain COL) GN=SACOL1759 PE=3 SV=1
23	94	Q5HCU6|ALF1_STAAC	99.2	241.81	71	36	36	Y	33055	Fructose-bisphosphate aldolase class 1 OS=Staphylococcus aureus (strain COL) GN=fda PE=3 SV=3
50	137	Q5HFK7|SODM1_STAAC	99.2	241.35	71	19	17	Y	22711	Superoxide dismutase [Mn/Fe] 1 OS=Staphylococcus aureus (strain COL) GN=sodA PE=3 SV=1
111	43	Q5HGD1|GLPD_STAAC	99.2	241.12	38	27	27	Y	62388	Aerobic glycerol-3-phosphate dehydrogenase OS=Staphylococcus aureus (strain COL) GN=glpD PE=3 SV=1
53	25	Q5HH01|PT1_STAAC	99.2	241.11	47	28	28	Y	63219	Phosphoenolpyruvate-protein phosphotransferase OS=Staphylococcus aureus (strain COL) GN=ptsI PE=3 SV=1
89	22	Q5HGN8|SYI_STAAC	99.2	241.02	40	32	32	Y	104885	Isoleucine--tRNA ligase OS=Staphylococcus aureus (strain COL) GN=ileS PE=3 SV=1
44	164	Q5HID6|RL10_STAAC	99.2	240.74	80	29	29	Y	17710	50S ribosomal protein L10 OS=Staphylococcus aureus (strain COL) GN=rplJ PE=3 SV=1
76	27	Q5HHR7|SECA1_STAAC	99.2	239.84	46	38	38	Y	95960	Protein translocase subunit SecA 1 OS=Staphylococcus aureus (strain COL) GN=secA1 PE=3 SV=1
96	63	Q5HE64|PDP_STAAC	99.2	239.26	63	23	23	Y	46308	Pyrimidine-nucleoside phosphorylase OS=Staphylococcus aureus (strain COL) GN=pdp PE=1 SV=1
71	19	Q5HIF7|SYK_STAAC	99.2	239.07	52	27	27	Y	56719	Lysine--tRNA ligase OS=Staphylococcus aureus (strain COL) GN=lysS PE=3 SV=1
39	121	Q5HDX0|RL5_STAAC	99.2	237.42	78	33	33	Y	20267	50S ribosomal protein L5 OS=Staphylococcus aureus (strain COL) GN=rplE PE=3 SV=1
83	140	Q5HE88|UPP_STAAC	99.2	237.4	76	26	26	Y	23050	Uracil phosphoribosyltransferase OS=Staphylococcus aureus (strain COL) GN=upp PE=3 SV=1
87	21	Q5HGF7|PNP_STAAC	99.2	237.24	52	34	34	Y	77362	Polyribonucleotide nucleotidyltransferase OS=Staphylococcus aureus (strain COL) GN=pnp PE=3 SV=1
125	72	Q5HHH1|Q5HHH1_STAAC	99.2	237.08	56	25	25	Y	48549	FeS assembly protein SufD OS=Staphylococcus aureus (strain COL) GN=sufD PE=4 SV=1
77	26	Q5HFR2|6PGD_STAAC	99.2	237.05	54	27	27	Y	51803	6-phosphogluconate dehydrogenase decarboxylating OS=Staphylococcus aureus (strain COL) GN=gnd PE=3 SV=1
49	77	Q5HE75|ALF2_STAAC	99.2	235.9	80	30	30	Y	30836	Fructose-bisphosphate aldolase OS=Staphylococcus aureus (strain COL) GN=fba PE=3 SV=1
24	87	Q5HGH6|RS2_STAAC	99.2	235.46	52	26	26	Y	29396	30S ribosomal protein S2 OS=Staphylococcus aureus (strain COL) GN=rpsB PE=3 SV=1
128	34	Q5HE49|GLMS_STAAC	99.2	234.83	42	21	21	Y	65850	Glutamine--fructose-6-phosphate aminotransferase [isomerizing] OS=Staphylococcus aureus (strain COL) GN=glmS PE=3 SV=3
68	115	Q5HGK2|FABG_STAAC	99.2	232.76	82	25	25	Y	26146	3-oxoacyl-[acyl-carrier-protein] reductase FabG OS=Staphylococcus aureus (strain COL) GN=fabG PE=3 SV=2
40	127	Q5HF54|RS4_STAAC	99.2	229.89	56	24	24	Y	23013	30S ribosomal protein S4 OS=Staphylococcus aureus (strain COL) GN=rpsD PE=3 SV=1
64	89	Q5HGP5|FTSZ_STAAC	99.2	229.49	64	29	29	Y	41037	Cell division protein FtsZ OS=Staphylococcus aureus (strain COL) GN=ftsZ PE=3 SV=1
108	42	Q5HGG8|SYP_STAAC	99.2	229.45	52	26	26	Y	63835	Proline--tRNA ligase OS=Staphylococcus aureus (strain COL) GN=proS PE=3 SV=1
61	108	Q5HDW1|RL2_STAAC	99.2	229.3	49	22	22	Y	30155	50S ribosomal protein L2 OS=Staphylococcus aureus (strain COL) GN=rplB PE=3 SV=1
104	67	Q5HE78|ALD1_STAAC	99.2	229.19	56	26	26	Y	51969	Putative aldehyde dehydrogenase SACOL2114 OS=Staphylococcus aureus (strain COL) GN=SACOL2114 PE=3 SV=1
81	47	Q5HG86|CATA_STAAC	99.2	228.44	45	23	23	Y	58380	Catalase OS=Staphylococcus aureus (strain COL) GN=katA PE=3 SV=2
148	79	Q5HDZ7|Q5HDZ7_STAAC	99.2	228.11	53	29	29	Y	61169	Acetolactate synthase catabolic OS=Staphylococcus aureus (strain COL) GN=budB PE=3 SV=1
52	49	Q5HIG2|CYSK_STAAC	99.2	227.26	81	21	21	Y	32976	Cysteine synthase OS=Staphylococcus aureus (strain COL) GN=cysK PE=3 SV=1
74	93	Q5HHQ4|TRXB_STAAC	99.2	225.74	58	30	30	Y	33616	Thioredoxin reductase OS=Staphylococcus aureus (strain COL) GN=trxB PE=3 SV=1
123	33	Q5HFE4|SYA_STAAC	99.2	225.57	28	22	22	Y	98520	Alanine--tRNA ligase OS=Staphylococcus aureus (strain COL) GN=alaS PE=3 SV=1
75	39	Q5HGP6|FTSA_STAAC	99.2	225.38	48	24	24	Y	52935	Cell division protein FtsA OS=Staphylococcus aureus (strain COL) GN=ftsA PE=3 SV=1
119	41	Q5HFA8|SYV_STAAC	99.2	224.26	36	33	33	Y	101724	Valine--tRNA ligase OS=Staphylococcus aureus (strain COL) GN=valS PE=3 SV=1
73	113	Q5HHP3|TPIS_STAAC	99.2	223.88	85	33	33	Y	27262	Triosephosphate isomerase OS=Staphylococcus aureus (strain COL) GN=tpiA PE=3 SV=1
35	179	Q5HET0|Y1902_STAAC	99.1	223.78	90	21	21	Y	13310	UPF0342 protein SACOL1902 OS=Staphylococcus aureus (strain COL) GN=SACOL1902 PE=3 SV=1
84	70	Q5HHB6|Y973_STAAC	99.2	222.76	73	20	20	Y	33113	Uncharacterized protein SACOL0973 OS=Staphylococcus aureus (strain COL) GN=SACOL0973 PE=3 SV=1
109	100	Q5HJM9|DEOB_STAAC	99.2	220.58	51	22	22	Y	43796	Phosphopentomutase OS=Staphylococcus aureus (strain COL) GN=deoB PE=3 SV=1
95	65	Q5HF24|DAAA_STAAC	99.2	220.58	69	19	19	Y	31894	D-alanine aminotransferase OS=Staphylococcus aureus (strain COL) GN=dat PE=3 SV=1
67	154	Q5HDZ0|RL13_STAAC	99.2	220.34	76	25	25	Y	16333	50S ribosomal protein L13 OS=Staphylococcus aureus (strain COL) GN=rplM PE=3 SV=1
118	36	Q5HHU0|Q5HHU0_STAAC	99.2	219.78	32	19	19	Y	80126	Ribonucleoside-diphosphate reductase OS=Staphylococcus aureus (strain COL) GN=SACOL0792 PE=3 SV=1
82	40	Q5HE73|PYRG_STAAC	99.2	219	57	29	29	Y	59992	CTP synthase OS=Staphylococcus aureus (strain COL) GN=pyrG PE=3 SV=1
177	84	Q5HDQ4|Y2296_STAAC	99.2	217.26	64	17	17	Y	34675	Putative 2-hydroxyacid dehydrogenase SACOL2296 OS=Staphylococcus aureus (strain COL) GN=SACOL2296 PE=3 SV=1
85	58	Q5HFI7|Y1630_STAAC	99.2	216.6	57	20	20	Y	35181	UPF0365 protein SACOL1630 OS=Staphylococcus aureus (strain COL) GN=SACOL1630 PE=3 SV=1
126	105	Q5HFM9|Q5HFM9_STAAC	99.2	216.59	55	21	21	Y	39338	Proline dipeptidase OS=Staphylococcus aureus (strain COL) GN=SACOL1588 PE=3 SV=1
130	35	Q5HII6|SYM_STAAC	99.2	216.38	33	20	20	Y	74886	Methionine--tRNA ligase OS=Staphylococcus aureus (strain COL) GN=metG PE=3 SV=1
136	62	Q5HF56|EZRA_STAAC	99.2	216.19	43	22	22	Y	66200	Septation ring formation regulator EzrA OS=Staphylococcus aureus (strain COL) GN=ezrA PE=3 SV=1
90	83	Q5HHP2|GPMI_STAAC	99.2	215.11	29	16	16	Y	56424	2 3-bisphosphoglycerate-independent phosphoglycerate mutase OS=Staphylococcus aureus (strain COL) GN=gpmI PE=3 SV=1
107	45	Q5HJY7|SYS_STAAC	99.2	214.34	49	19	19	Y	48640	Serine--tRNA ligase OS=Staphylococcus aureus (strain COL) GN=serS PE=3 SV=1
97	71	Q5HHE4|Y944_STAAC	99.2	214.3	40	22	22	Y	44104	NADH dehydrogenase-like protein SACOL0944 OS=Staphylococcus aureus (strain COL) GN=SACOL0944 PE=3 SV=1
151	64	Q5HJZ0|GYRA_STAAC	99.2	213.08	38	27	27	Y	99350	DNA gyrase subunit A OS=Staphylococcus aureus (strain COL) GN=gyrA PE=3 SV=1
145	75	Q5HIE7|SYE_STAAC	99.2	212.62	53	24	24	Y	56304	Glutamate--tRNA ligase OS=Staphylococcus aureus (strain COL) GN=gltX PE=3 SV=1
124	85	Q5HF72|Q5HF72_STAAC	99.2	212.09	59	21	21	Y	44234	NADP-dependent malic enzyme putative OS=Staphylococcus aureus (strain COL) GN=SACOL1749 PE=3 SV=1
65	195	Q5HIC9|RS7_STAAC	99.1	212.04	58	15	15	Y	17794	30S ribosomal protein S7 OS=Staphylococcus aureus (strain COL) GN=rpsG PE=3 SV=1
122	125	Q5HIF5|PDXS_STAAC	99.2	211.31	66	26	26	Y	31993	Pyridoxal biosynthesis lyase PdxS OS=Staphylococcus aureus (strain COL) GN=pdxS PE=3 SV=1
133	61	Q5HIQ7|IMDH_STAAC	99.2	210.71	59	22	22	Y	52851	Inosine-5'-monophosphate dehydrogenase OS=Staphylococcus aureus (strain COL) GN=guaB PE=3 SV=1
110	57	Q5HGC3|GLNA_STAAC	99.2	210.48	50	22	22	Y	50841	Glutamine synthetase OS=Staphylococcus aureus (strain COL) GN=glnA PE=3 SV=1
45	136	Q5HID7|RL1_STAAC	99.2	210.42	59	17	17	Y	24708	50S ribosomal protein L1 OS=Staphylococcus aureus (strain COL) GN=rplA PE=3 SV=1
105	73	Q5HJD8|Q5HJD8_STAAC	99.2	210.34	51	19	19	Y	42907	Flavohemoprotein putative OS=Staphylococcus aureus (strain COL) GN=SACOL0220 PE=3 SV=1
149	99	Q5HEM3|GATB_STAAC	99.2	208.01	50	21	21	Y	53657	Aspartyl/glutamyl-tRNA(Asn/Gln) amidotransferase subunit B OS=Staphylococcus aureus (strain COL) GN=gatB PE=3 SV=1
189	92	Q5HF74|ACCA_STAAC	99.2	207.02	70	19	19	Y	35070	Acetyl-coenzyme A carboxylase carboxyl transferase subunit alpha OS=Staphylococcus aureus (strain COL) GN=accA PE=3 SV=1
43	186	Q5HGT9|THIO_STAAC	99.1	206.99	88	19	19	Y	11440	Thioredoxin OS=Staphylococcus aureus (strain COL) GN=trxA PE=3 SV=1
132	109	Q5HFY5|TDCB_STAAC	99.2	206.66	49	15	15	Y	37306	L-threonine dehydratase catabolic TdcB OS=Staphylococcus aureus (strain COL) GN=tdcB PE=3 SV=1
212	76	Q5HF42|FTHS_STAAC	99.2	206.33	35	17	17	Y	59914	Formate--tetrahydrofolate ligase OS=Staphylococcus aureus (strain COL) GN=fhs PE=3 SV=2
140	59	Q5HFW9|SYN_STAAC	99.2	206.21	45	19	19	Y	49158	Asparagine--tRNA ligase OS=Staphylococcus aureus (strain COL) GN=asnS PE=3 SV=1
102	131	Q5HCR5|ARCC2_STAAC	99.2	205.63	49	14	14	Y	34329	Carbamate kinase 2 OS=Staphylococcus aureus (strain COL) GN=arcC2 PE=3 SV=1
99	226	Q5HDX7|RL15_STAAC	99.1	204.84	62	15	15	Y	15597	50S ribosomal protein L15 OS=Staphylococcus aureus (strain COL) GN=rplO PE=3 SV=1
72	81	Q5HJD7|LDH1_STAAC	99.2	203.3	59	18	18	Y	34583	L-lactate dehydrogenase 1 OS=Staphylococcus aureus (strain COL) GN=ldh1 PE=1 SV=1
32	260	Q5HH02|PTHP_STAAC	99.1	203.19	89	20	20	Y	9496	Phosphocarrier protein HPr OS=Staphylococcus aureus (strain COL) GN=ptsH PE=3 SV=1
46	263	Q5HIS9|RS6_STAAC	99.1	203.15	78	17	17	Y	11595	30S ribosomal protein S6 OS=Staphylococcus aureus (strain COL) GN=rpsF PE=3 SV=2
57	191	Q5HDX3|RL6_STAAC	99.1	202.39	51	15	15	Y	19787	50S ribosomal protein L6 OS=Staphylococcus aureus (strain COL) GN=rplF PE=3 SV=1
129	56	Q5HEM2|GATA_STAAC	99.2	202.36	43	18	18	Y	52821	Glutamyl-tRNA(Gln) amidotransferase subunit A OS=Staphylococcus aureus (strain COL) GN=gatA PE=3 SV=1
54	114	Q5HDW4|RS3_STAAC	99.2	201.65	53	18	18	Y	24114	30S ribosomal protein S3 OS=Staphylococcus aureus (strain COL) GN=rpsC PE=3 SV=1
144	55	Q5HFJ5|SYG_STAAC	99.2	200.89	50	20	20	Y	53620	Glycine--tRNA ligase OS=Staphylococcus aureus (strain COL) GN=glyQS PE=3 SV=1
190	98	Q5HCQ3|Q5HCQ3_STAAC	99.2	200.66	26	13	13	Y	69253	N-acetylmuramoyl-L-alanine amidase domain protein OS=Staphylococcus aureus (strain COL) GN=SACOL2666 PE=4 SV=1
70	118	Q5HDY4|RPOA_STAAC	99.2	200.3	46	19	19	Y	35012	DNA-directed RNA polymerase subunit alpha OS=Staphylococcus aureus (strain COL) GN=rpoA PE=3 SV=1
213	52	Q5HGX0|Q5HGX0_STAAC	99.2	200.23	19	16	16	Y	128548	Pyruvate carboxylase OS=Staphylococcus aureus (strain COL) GN=pyc PE=3 SV=1
86	53	Q5HGG5|Q5HGG5_STAAC	99.2	199.35	48	18	18	Y	43741	Transcription termination/antitermination protein NusA OS=Staphylococcus aureus (strain COL) GN=nusA PE=3 SV=1
206	90	Q5HFX3|Q5HFX3_STAAC	99.2	199.08	31	17	17	Y	80426	Penicillin-binding protein 2 OS=Staphylococcus aureus (strain COL) GN=pbp2 PE=4 SV=1
79	193	Q5HE72|RPOE_STAAC	99.1	198.89	52	15	15	Y	20881	Probable DNA-directed RNA polymerase subunit delta OS=Staphylococcus aureus (strain COL) GN=rpoE PE=3 SV=1
176	101	Q5HH84|Q5HH84_STAAC	99.2	198.48	30	16	16	Y	69819	Oligoendopeptidase F OS=Staphylococcus aureus (strain COL) GN=pepF PE=4 SV=1
260	103	Q5HIQ6|GUAA_STAAC	99.2	197.37	32	13	13	Y	58231	GMP synthase [glutamine-hydrolyzing] OS=Staphylococcus aureus (strain COL) GN=guaA PE=3 SV=1
147	152	Q5HD04|Q5HD04_STAAC	99.2	197.1	34	13	13	Y	43206	Hydroxymethylglutaryl-CoA synthase OS=Staphylococcus aureus (strain COL) GN=SACOL2561 PE=4 SV=1
159	135	Q5HEB7|DDL_STAAC	99.2	196.97	40	16	16	Y	40231	D-alanine--D-alanine ligase OS=Staphylococcus aureus (strain COL) GN=ddl PE=1 SV=1
150	180	Q5HIR2|Q5HIR2_STAAC	99.2	196.05	40	15	15	Y	35612	Uncharacterized protein OS=Staphylococcus aureus (strain COL) GN=SACOL0455 PE=4 SV=1
91	111	Q5HEK1|PPAC_STAAC	99.2	196.01	44	16	16	Y	34069	Probable manganese-dependent inorganic pyrophosphatase OS=Staphylococcus aureus (strain COL) GN=ppaC PE=3 SV=1
261	218	Q5HFA5|GSA1_STAAC	99.2	195.29	41	16	16	Y	46388	Glutamate-1-semialdehyde 2 1-aminomutase 1 OS=Staphylococcus aureus (strain COL) GN=hemL1 PE=3 SV=1
201	126	Q5HGK3|FABD_STAAC	99.2	193.99	49	15	15	Y	33635	Malonyl CoA-acyl carrier protein transacylase OS=Staphylococcus aureus (strain COL) GN=fabD PE=3 SV=1
93	151	Q5HIC4|HCHA_STAAC	99.2	193.79	44	15	15	Y	32177	Molecular chaperone Hsp31 and glyoxalase 3 OS=Staphylococcus aureus (strain COL) GN=hchA PE=3 SV=1
88	122	Q5HDX9|KAD_STAAC	99.2	193.68	56	14	14	Y	23974	Adenylate kinase OS=Staphylococcus aureus (strain COL) GN=adk PE=3 SV=1
184	106	Q5HGZ5|RNJ1_STAAC	99.2	193.61	36	16	16	Y	62669	Ribonuclease J 1 OS=Staphylococcus aureus (strain COL) GN=SACOL1098 PE=3 SV=1
223	78	Q5HFR7|Q5HFR7_STAAC	99.2	193.05	40	14	14	Y	56965	Glucose-6-phosphate 1-dehydrogenase OS=Staphylococcus aureus (strain COL) GN=zwf PE=3 SV=1
200	175	Q5HE82|RF1_STAAC	99.2	191.65	35	10	10	Y	40350	Peptide chain release factor 1 OS=Staphylococcus aureus (strain COL) GN=prfA PE=3 SV=1
56	211	Q5HIH4|RL25_STAAC	99.1	191.57	36	13	13	Y	23788	50S ribosomal protein L25 OS=Staphylococcus aureus (strain COL) GN=rplY PE=3 SV=1
279	69	Q5HH31|ATL_STAAC	99.2	191.38	25	21	21	Y	137335	Bifunctional autolysin OS=Staphylococcus aureus (strain COL) GN=atl PE=3 SV=1
138	143	Q5HER0|GSA2_STAAC	99.1	190.88	32	10	10	Y	46756	Glutamate-1-semialdehyde 2 1-aminomutase 2 OS=Staphylococcus aureus (strain COL) GN=hemL2 PE=3 SV=1
161	80	Q5HFY4|DHA1_STAAC	99.2	190.72	42	14	14	Y	40235	Alanine dehydrogenase 1 OS=Staphylococcus aureus (strain COL) GN=ald1 PE=3 SV=1
117	166	Q5HIH5|KPRS_STAAC	99.1	190.44	50	16	16	Y	35283	Ribose-phosphate pyrophosphokinase OS=Staphylococcus aureus (strain COL) GN=prs PE=3 SV=1
59	214	Q5HDW3|RL22_STAAC	99.1	190.15	57	14	14	Y	12835	50S ribosomal protein L22 OS=Staphylococcus aureus (strain COL) GN=rplV PE=3 SV=1
33	155	Q5HDV9|RL4_STAAC	99.1	190.14	59	12	12	Y	22465	50S ribosomal protein L4 OS=Staphylococcus aureus (strain COL) GN=rplD PE=3 SV=1
169	60	Q5HE87|GLYA_STAAC	99.2	189.95	46	15	15	Y	45172	Serine hydroxymethyltransferase OS=Staphylococcus aureus (strain COL) GN=glyA PE=1 SV=1
143	110	Q5HGS1|Q5HGS1_STAAC	99.2	189.8	50	16	16	Y	35973	Alpha-hemolysin OS=Staphylococcus aureus (strain COL) GN=hlY PE=4 SV=1
166	142	Q5HHT9|Q5HHT9_STAAC	99.2	189.76	41	11	11	Y	37513	Ribonucleoside-diphosphate reductase 2 beta subunit OS=Staphylococcus aureus (strain COL) GN=nrdF PE=4 SV=1
135	119	Q5HHA1|FABF_STAAC	99.2	189.43	47	18	18	Y	43739	3-oxoacyl-[acyl-carrier-protein] synthase 2 OS=Staphylococcus aureus (strain COL) GN=fabF PE=1 SV=1
94	104	Q5HEZ4|Q5HEZ4_STAAC	99.2	189	54	14	14	Y	25705	Transaldolase OS=Staphylococcus aureus (strain COL) GN=tal PE=3 SV=1
178	117	Q5HEB9|Y2072_STAAC	99.2	188.65	34	17	17	Y	56942	Probable DEAD-box ATP-dependent RNA helicase SACOL2072 OS=Staphylococcus aureus (strain COL) GN=SACOL2072 PE=3 SV=1
116	91	Q5HJZ4|DPO3B_STAAC	99.2	188.42	38	16	16	Y	41914	DNA polymerase III subunit beta OS=Staphylococcus aureus (strain COL) GN=dnaN PE=3 SV=1
173	149	Q5HIC1|ILVE_STAAC	99.2	188.36	52	15	15	Y	40086	Probable branched-chain-amino-acid aminotransferase OS=Staphylococcus aureus (strain COL) GN=ilvE PE=3 SV=1
101	174	Q5HE63|DEOC2_STAAC	99.2	188.2	61	13	3	Y	23327	Deoxyribose-phosphate aldolase 2 OS=Staphylococcus aureus (strain COL) GN=deoC2 PE=3 SV=1
175	160	Q5HDE2|Q5HDE2_STAAC	99.1	188.02	34	10	10	Y	28904	Amino acid ABC transporter amino acid-binding protein OS=Staphylococcus aureus (strain COL) GN=SACOL2412 PE=4 SV=1
155	504	Q5HDW2|RS19_STAAC	98.8	187.31	48	10	10	Y	10615	30S ribosomal protein S19 OS=Staphylococcus aureus (strain COL) GN=rpsS PE=3 SV=1
254	124	Q5HHF2|DLTA_STAAC	99.2	187.14	27	12	12	Y	54670	D-alanine--poly(phosphoribitol) ligase subunit 1 OS=Staphylococcus aureus (strain COL) GN=dltA PE=3 SV=1
227	96	Q5HHE3|Q5HHE3_STAAC	99.2	186.92	41	15	15	Y	54129	Cytosol aminopeptidase OS=Staphylococcus aureus (strain COL) GN=SACOL0945 PE=1 SV=1
174	82	Q5HGX5|Q5HGX5_STAAC	99.2	186.65	26	15	15	Y	69166	GTP-binding protein TypA OS=Staphylococcus aureus (strain COL) GN=typA PE=4 SV=1
34	201	Q5HFB6|RL21_STAAC	99.1	186.41	67	12	12	Y	11333	50S ribosomal protein L21 OS=Staphylococcus aureus (strain COL) GN=rplU PE=3 SV=1
103	171	Q5HJN0|DEOC1_STAAC	99.2	185.62	60	13	3	Y	23472	Deoxyribose-phosphate aldolase 1 OS=Staphylococcus aureus (strain COL) GN=deoC1 PE=3 SV=1
268	145	Q5HGU5|SYFB_STAAC	99.2	184.22	21	13	13	Y	88921	Phenylalanine--tRNA ligase beta subunit OS=Staphylococcus aureus (strain COL) GN=pheT PE=3 SV=1
164	134	Q5HFH9|GRPE_STAAC	99.2	183.19	76	13	13	Y	24007	Protein GrpE OS=Staphylococcus aureus (strain COL) GN=grpE PE=3 SV=1
185	200	Q5HHH0|CSD_STAAC	99.2	182.86	49	14	14	Y	46276	Probable cysteine desulfurase OS=Staphylococcus aureus (strain COL) GN=csd PE=3 SV=1
233	107	Q5HEK8|Q5HEK8_STAAC	99.2	182.57	27	11	11	Y	55892	Nicotinate phosphoribosyltransferase OS=Staphylococcus aureus (strain COL) GN=SACOL1975 PE=3 SV=1
204	156	Q5HF23|PEPVL_STAAC	99.2	182.29	44	20	20	Y	52824	Putative dipeptidase SACOL1801 OS=Staphylococcus aureus (strain COL) GN=SACOL1801 PE=1 SV=1
154	222	Q5HF75|K6PF_STAAC	99.1	181.92	41	13	13	Y	34840	6-phosphofructokinase OS=Staphylococcus aureus (strain COL) GN=pfkA PE=3 SV=1
238	86	Q5HEY8|PCKA_STAAC	99.2	181.32	29	13	13	Y	59377	Phosphoenolpyruvate carboxykinase [ATP] OS=Staphylococcus aureus (strain COL) GN=pckA PE=3 SV=1
183	116	Q5HEY9|METK_STAAC	99.2	181.22	33	13	13	Y	43641	S-adenosylmethionine synthase OS=Staphylococcus aureus (strain COL) GN=metK PE=3 SV=1
152	129	Q5HE43|GLMM_STAAC	99.2	180.71	36	13	13	Y	49266	Phosphoglucosamine mutase OS=Staphylococcus aureus (strain COL) GN=glmM PE=1 SV=1
157	88	Q5HHG8|Y918_STAAC	99.2	179.82	33	16	16	Y	52531	UPF0051 protein SACOL0918 OS=Staphylococcus aureus (strain COL) GN=SACOL0918 PE=3 SV=1
195	250	Q5HG08|Q5HG08_STAAC	99.1	178.97	44	10	10	Y	30085	Uncharacterized protein OS=Staphylococcus aureus (strain COL) GN=SACOL1447 PE=4 SV=1
228	158	Q5HEA0|MURA1_STAAC	99.2	178.84	46	14	14	Y	44996	UDP-N-acetylglucosamine 1-carboxyvinyltransferase 1 OS=Staphylococcus aureus (strain COL) GN=murA1 PE=3 SV=1
182	348	Q5HHD1|PPI1_STAAC	99	178.51	45	10	10	Y	21649	Putative peptidyl-prolyl cis-trans isomerase OS=Staphylococcus aureus (strain COL) GN=SACOL0957 PE=3 SV=1
199	102	Q5HF98|CLPX_STAAC	99.2	177.21	43	11	11	Y	46298	ATP-dependent Clp protease ATP-binding subunit ClpX OS=Staphylococcus aureus (strain COL) GN=clpX PE=3 SV=1
198	159	Q5HJX7|WALR_STAAC	99.1	177.01	52	11	11	Y	27192	Transcriptional regulatory protein WalR OS=Staphylococcus aureus (strain COL) GN=walR PE=3 SV=1
208	202	Q5HIA5|HPS_STAAC	99.1	176.53	74	11	11	Y	22436	3-hexulose-6-phosphate synthase OS=Staphylococcus aureus (strain COL) GN=SACOL0617 PE=3 SV=1
246	234	Q5HFL3|Q5HFL3_STAAC	99.1	176.02	32	11	11	Y	35078	Glucokinase OS=Staphylococcus aureus (strain COL) GN=glk PE=4 SV=1
162	139	Q5HES0|Q5HES0_STAAC	99.2	175.98	66	11	11	Y	22343	Glucosamine-6-phosphate isomerase putative OS=Staphylococcus aureus (strain COL) GN=SACOL1912 PE=4 SV=1
277	196	Q5HIT1|Q5HIT1_STAAC	99.2	175.76	39	13	13	Y	40595	Ribosome-binding ATPase YchF OS=Staphylococcus aureus (strain COL) GN=ychF PE=3 SV=1
160	112	Q5HH75|Q5HH75_STAAC	99.2	175.62	64	14	14	Y	27992	Enoyl-[acyl-carrier-protein] reductase [NADPH] OS=Staphylococcus aureus (strain COL) GN=fabI PE=3 SV=1
241	210	Q5HJN5|SODM2_STAAC	99.1	174.91	60	10	8	Y	23041	Superoxide dismutase [Mn/Fe] 2 OS=Staphylococcus aureus (strain COL) GN=sodM PE=3 SV=1
131	150	Q5HJY1|RL9_STAAC	99.1	174.82	56	14	14	Y	16454	50S ribosomal protein L9 OS=Staphylococcus aureus (strain COL) GN=rplI PE=3 SV=1
215	128	Q5HJM2|Q5HJM2_STAAC	99.2	173.12	17	11	11	Y	94945	Alcohol dehydrogenase iron-containing OS=Staphylococcus aureus (strain COL) GN=SACOL0135 PE=4 SV=1
153	141	Q5HII0|Q5HII0_STAAC	99.2	172.87	45	10	10	Y	30395	Pur operon repressor OS=Staphylococcus aureus (strain COL) GN=purR PE=4 SV=1
272	190	Q5HEU2|DCUP_STAAC	99.1	172.76	39	9	9	Y	39352	Uroporphyrinogen decarboxylase OS=Staphylococcus aureus (strain COL) GN=hemE PE=3 SV=1
179	216	Q5HIR0|UP355_STAAC	99.1	172.69	79	9	9	Y	15122	UPF0355 protein SACOL0457 OS=Staphylococcus aureus (strain COL) GN=SACOL0457 PE=3 SV=1
211	181	Q5HIG4|Q5HIG4_STAAC	99.1	172.68	29	14	14	Y	77784	ATP-dependent zinc metalloprotease FtsH OS=Staphylococcus aureus (strain COL) GN=ftsH PE=3 SV=1
120	258	Q5HDW5|RL16_STAAC	99.1	172.22	58	17	17	Y	16242	50S ribosomal protein L16 OS=Staphylococcus aureus (strain COL) GN=rplP PE=3 SV=1
165	123	Q5HGH7|CODY_STAAC	99.2	171.99	61	16	16	Y	28755	GTP-sensing transcriptional pleiotropic repressor CodY OS=Staphylococcus aureus (strain COL) GN=codY PE=3 SV=1
193	133	Q5HH71|Y1020_STAAC	99.2	171.89	67	10	10	Y	19326	UPF0477 protein SACOL1020 OS=Staphylococcus aureus (strain COL) GN=SACOL1020 PE=3 SV=1
92	172	Q5HF61|TPX_STAAC	99.1	171.62	72	9	9	Y	18005	Probable thiol peroxidase OS=Staphylococcus aureus (strain COL) GN=tpx PE=3 SV=1
217	132	Q5HF79|IDH_STAAC	99.2	170.68	34	10	10	Y	46423	Isocitrate dehydrogenase [NADP] OS=Staphylococcus aureus (strain COL) GN=icd PE=3 SV=1
139	97	Q5HF46|Q5HF46_STAAC	99.2	169.52	51	16	16	Y	45803	Serine protease HtrA putative OS=Staphylococcus aureus (strain COL) GN=SACOL1777 PE=4 SV=1
58	326	Q5HHR8|Y815_STAAC	99	169.23	38	10	10	Y	22225	Uncharacterized protein SACOL0815 OS=Staphylococcus aureus (strain COL) GN=SACOL0815 PE=3 SV=1
60	192	Q5HDX2|RS8_STAAC	99.1	167.73	65	10	10	Y	14831	30S ribosomal protein S8 OS=Staphylococcus aureus (strain COL) GN=rpsH PE=3 SV=1
304	251	Q5HF16|SYL_STAAC	99.1	167.7	23	12	12	Y	91786	Leucine--tRNA ligase OS=Staphylococcus aureus (strain COL) GN=leuS PE=3 SV=1
137	633	Q5HE80|RL31B_STAAC	98.6	167.59	62	8	8	Y	9723	50S ribosomal protein L31 type B OS=Staphylococcus aureus (strain COL) GN=rpmE2 PE=3 SV=1
80	206	Q5HDX5|RS5_STAAC	99.1	166.87	55	18	18	Y	17742	30S ribosomal protein S5 OS=Staphylococcus aureus (strain COL) GN=rpsE PE=3 SV=1
255	147	Q5HHB4|CDR_STAAC	99.2	166.77	31	9	9	Y	49291	Coenzyme A disulfide reductase OS=Staphylococcus aureus (strain COL) GN=cdr PE=3 SV=3
265	138	Q5HFB9|OBG_STAAC	99.2	166.63	34	9	9	N	47201	GTPase Obg OS=Staphylococcus aureus (strain COL) GN=obg PE=3 SV=1
282	254	Q5HH23|QOX2_STAAC	99.1	165.93	41	14	14	Y	41777	Probable quinol oxidase subunit 2 OS=Staphylococcus aureus (strain COL) GN=qoxA PE=3 SV=1
266	162	Q5HG28|Q5HG28_STAAC	99.2	165.43	24	12	12	Y	60256	ABC transporter ATP-binding protein OS=Staphylococcus aureus (strain COL) GN=SACOL1427 PE=4 SV=1
127	257	Q5HDZ1|RS9_STAAC	99.1	165.06	57	9	9	Y	14830	30S ribosomal protein S9 OS=Staphylococcus aureus (strain COL) GN=rpsI PE=3 SV=1
380	173	Q5HFD3|SYD_STAAC	99.1	164.45	34	14	14	Y	66599	Aspartate--tRNA ligase OS=Staphylococcus aureus (strain COL) GN=aspS PE=3 SV=1
202	194	Q5HJP2|BUTA_STAAC	99.1	164.33	46	8	8	Y	27216	Diacetyl reductase [(S)-acetoin forming] OS=Staphylococcus aureus (strain COL) GN=butA PE=3 SV=1
156	144	Q5HHY2|MGRA_STAAC	99.2	163.91	63	9	9	Y	17089	HTH-type transcriptional regulator MgrA OS=Staphylococcus aureus (strain COL) GN=mgrA PE=3 SV=3
113	253	Q5HHW2|Q5HHW2_STAAC	99.1	163.31	36	9	9	Y	16045	Uncharacterized protein OS=Staphylococcus aureus (strain COL) GN=SACOL0768 PE=4 SV=1
220	387	Q5HDY0|IF1_STAAC	98.7	163.07	85	8	8	Y	8280	Translation initiation factor IF-1 OS=Staphylococcus aureus (strain COL) GN=infA PE=3 SV=1
205	344	Q5HFF2|GREA_STAAC	98.9	162.62	45	5	5	Y	17743	Transcription elongation factor GreA OS=Staphylococcus aureus (strain COL) GN=greA PE=3 SV=1
253	223	Q5HF37|Q5HF37_STAAC	99.1	162.61	28	8	8	Y	40618	Chorismate mutase/phospho-2-dehydro-3-deoxyheptonate aldolase OS=Staphylococcus aureus (strain COL) GN=SACOL1787 PE=4 SV=1
338	165	Q5HDQ3|Q5HDQ3_STAAC	99.1	162.18	29	9	9	Y	41890	Monooxygenase family protein OS=Staphylococcus aureus (strain COL) GN=SACOL2297 PE=4 SV=1
196	157	Q5HET4|PRSA_STAAC	99.1	162.16	23	11	11	Y	35638	Foldase protein PrsA OS=Staphylococcus aureus (strain COL) GN=prsA PE=3 SV=1
280	187	Q5HG36|Q5HG36_STAAC	99.1	161.86	21	8	8	Y	69299	Oligoendopeptidase F putative OS=Staphylococcus aureus (strain COL) GN=SACOL1419 PE=4 SV=1
332	185	Q5HDU6|FEMX_STAAC	99.1	161.45	35	10	10	Y	48551	Lipid II:glycine glycyltransferase OS=Staphylococcus aureus (strain COL) GN=femX PE=3 SV=1
194	376	Q5HFE5|Y1672_STAAC	98.7	161.39	59	6	6	Y	10303	UPF0297 protein SACOL1672 OS=Staphylococcus aureus (strain COL) GN=SACOL1672 PE=3 SV=1
114	274	Q5HGJ1|RL19_STAAC	99	160.01	44	15	15	Y	13362	50S ribosomal protein L19 OS=Staphylococcus aureus (strain COL) GN=rplS PE=3 SV=1
180	367	Q5HE62|Q5HE62_STAAC	99	159.87	40	11	11	Y	25908	Purine nucleoside phosphorylase DeoD-type OS=Staphylococcus aureus (strain COL) GN=deoD PE=3 SV=1
203	337	Q5HEM1|GATC_STAAC	98.9	159.62	67	7	7	Y	11268	Aspartyl/glutamyl-tRNA(Asn/Gln) amidotransferase subunit C OS=Staphylococcus aureus (strain COL) GN=gatC PE=3 SV=1
216	244	Q5HEU0|TRAP_STAAC	99.1	158.51	53	7	7	Y	19548	Signal transduction protein TRAP OS=Staphylococcus aureus (strain COL) GN=traP PE=3 SV=1
207	340	Q5HGM2|RPOZ_STAAC	99	157.93	82	8	8	Y	8150	DNA-directed RNA polymerase subunit omega OS=Staphylococcus aureus (strain COL) GN=rpoZ PE=3 SV=1
172	295	Q5HHZ9|Y727_STAAC	99	156.48	26	7	7	Y	26320	Probable transcriptional regulatory protein SACOL0727 OS=Staphylococcus aureus (strain COL) GN=SACOL0727 PE=3 SV=1
242	209	Q5HED6|RSBW_STAAC	99.1	155.69	75	11	11	Y	17921	Serine-protein kinase RsbW OS=Staphylococcus aureus (strain COL) GN=rsbW PE=3 SV=1
134	262	Q5HDR3|SARR_STAAC	99	155.29	52	6	6	Y	13669	HTH-type transcriptional regulator SarR OS=Staphylococcus aureus (strain COL) GN=sarR PE=3 SV=3
328	293	Q5HHA2|FABH_STAAC	99.1	155.22	31	10	10	Y	33879	3-oxoacyl-[acyl-carrier-protein] synthase 3 OS=Staphylococcus aureus (strain COL) GN=fabH PE=3 SV=1
305	220	Q5HG69|ACON_STAAC	99.1	155.06	22	12	12	Y	98970	Aconitate hydratase OS=Staphylococcus aureus (strain COL) GN=acnA PE=3 SV=1
314	228	Q5HFQ4|Q5HFQ4_STAAC	99.1	155.04	28	6	6	N	36230	2-oxoisovalerate dehydrogenase E1 component alpha subunit OS=Staphylococcus aureus (strain COL) GN=SACOL1562 PE=4 SV=1
362	315	Q5HFI1|DNAJ_STAAC	99.1	154.98	31	10	10	Y	41761	Chaperone protein DnaJ OS=Staphylococcus aureus (strain COL) GN=dnaJ PE=3 SV=1
333	168	Q5HEJ8|Y1985_STAAC	99.1	154.48	35	8	8	Y	38547	Uncharacterized protein SACOL1985 OS=Staphylococcus aureus (strain COL) GN=SACOL1985 PE=3 SV=1
325	189	Q5HF83|Q5HF83_STAAC	99.1	154.2	15	11	10	Y	99195	DNA polymerase OS=Staphylococcus aureus (strain COL) GN=polA PE=3 SV=1
384	241	Q5HET1|Q5HET1_STAAC	99.1	154.06	21	7	7	Y	46225	DNA repair exonuclease family protein OS=Staphylococcus aureus (strain COL) GN=SACOL1900 PE=4 SV=1
243	184	Q5HHC7|DHE2_STAAC	99.1	153.99	30	8	8	Y	45760	NAD-specific glutamate dehydrogenase OS=Staphylococcus aureus (strain COL) GN=gluD PE=3 SV=1
327	153	Q5HG44|FEMB_STAAC	99.1	153.53	29	9	9	Y	49676	Aminoacyltransferase FemB OS=Staphylococcus aureus (strain COL) GN=femB PE=3 SV=1
78	322	Q5HDY5|RL17_STAAC	99	153.22	54	10	10	Y	13748	50S ribosomal protein L17 OS=Staphylococcus aureus (strain COL) GN=rplQ PE=3 SV=1
288	261	Q5HE96|ATPG_STAAC	99.1	153.14	32	8	8	Y	32106	ATP synthase gamma chain OS=Staphylococcus aureus (strain COL) GN=atpG PE=3 SV=1
168	527	Q5HG18|CSPA_STAAC	97.1	152.72	79	6	6	Y	7321	Cold shock protein CspA OS=Staphylococcus aureus (strain COL) GN=cspA PE=1 SV=1
290	302	Q5HID9|NUSG_STAAC	99.1	152.21	43	9	9	Y	20664	Transcription termination/antitermination protein NusG OS=Staphylococcus aureus (strain COL) GN=nusG PE=3 SV=1
236	163	Q5HFB4|Q5HFB4_STAAC	99.1	152.09	39	8	8	Y	31010	Cell shape-determining protein MreC OS=Staphylococcus aureus (strain COL) GN=mreC PE=3 SV=1
221	130	Q5HGF6|RNJ2_STAAC	99.2	151.48	19	9	9	Y	62604	Ribonuclease J 2 OS=Staphylococcus aureus (strain COL) GN=SACOL1294 PE=3 SV=2
322	177	Q5HG64|PARC_STAAC	99.1	151.45	14	10	10	Y	90998	DNA topoisomerase 4 subunit A OS=Staphylococcus aureus (strain COL) GN=parC PE=3 SV=1
300	176	Q5HDP9|FDHL_STAAC	99.1	151.3	10	8	8	Y	111244	Putative formate dehydrogenase SACOL2301 OS=Staphylococcus aureus (strain COL) GN=SACOL2301 PE=3 SV=1
273	170	Q5HEI2|OMP7_STAAC	99.2	150.99	26	18	18	Y	77060	77 kDa membrane protein OS=Staphylococcus aureus (strain COL) GN=SACOL2002 PE=3 SV=1
197	232	Q5HDZ8|Q5HDZ8_STAAC	99.1	150.34	46	9	9	Y	26223	Alpha-acetolactate decarboxylase OS=Staphylococcus aureus (strain COL) GN=budA1 PE=4 SV=1
276	213	Q5HGH8|HSLU_STAAC	99.1	150.24	24	7	7	Y	52315	ATP-dependent protease ATPase subunit HslU OS=Staphylococcus aureus (strain COL) GN=hslU PE=3 SV=1
230	207	Q5HFU8|DER_STAAC	99.1	149.12	21	8	8	Y	48980	GTPase Der OS=Staphylococcus aureus (strain COL) GN=der PE=3 SV=1
237	585	Q5HFN0|EFP_STAAC	98.8	149.08	45	9	9	Y	20554	Elongation factor P OS=Staphylococcus aureus (strain COL) GN=efp PE=3 SV=1
224	259	Q5HF68|Q5HF68_STAAC	99.1	148.86	54	6	6	Y	15226	Universal stress protein family OS=Staphylococcus aureus (strain COL) GN=SACOL1753 PE=4 SV=1
106	420	Q5HGF8|RS15_STAAC	98.4	148.75	49	6	6	Y	10608	30S ribosomal protein S15 OS=Staphylococcus aureus (strain COL) GN=rpsO PE=3 SV=1
115	318	Q5HDY3|RS11_STAAC	99	148.73	38	8	8	Y	13882	30S ribosomal protein S11 OS=Staphylococcus aureus (strain COL) GN=rpsK PE=3 SV=1
192	267	Q5HFZ9|PTGA_STAAC	99	148.59	42	8	8	Y	17961	Glucose-specific phosphotransferase enzyme IIA component OS=Staphylococcus aureus (strain COL) GN=crr PE=3 SV=1
350	219	Q5HEL8|DNLJ_STAAC	99.1	148.37	12	7	7	Y	75080	DNA ligase OS=Staphylococcus aureus (strain COL) GN=ligA PE=3 SV=1
320	310	Q5HI96|PDXK_STAAC	99.1	147.94	33	9	9	Y	29857	Putative pyridoxine kinase OS=Staphylococcus aureus (strain COL) GN=pdxK PE=3 SV=1
416	455	Q5HGN9|Q5HGN9_STAAC	98	147.34	36	10	10	Y	23514	Cell-division initiation protein putative OS=Staphylococcus aureus (strain COL) GN=SACOL1205 PE=3 SV=1
311	249	Q5HF35|Y1789_STAAC	99.1	147.15	42	8	8	Y	18002	UPF0478 protein SACOL1789 OS=Staphylococcus aureus (strain COL) GN=SACOL1789 PE=3 SV=1
232	557	Q5HFX8|GPSB_STAAC	96.6	146.83	33	7	7	Y	13151	Cell cycle protein GpsB OS=Staphylococcus aureus (strain COL) GN=gpsB PE=3 SV=1
214	280	Q5HIU0|THLA_STAAC	99.1	146.75	26	6	6	Y	41676	Probable acetyl-CoA acyltransferase OS=Staphylococcus aureus (strain COL) GN=SACOL0426 PE=3 SV=1
287	161	Q5HF38|CCPA_STAAC	99.1	146.67	38	13	13	Y	36060	Catabolite control protein A OS=Staphylococcus aureus (strain COL) GN=ccpA PE=3 SV=1
437	236	Q5HFY8|EBH_STAAC	99.1	146.52	4	26	26	Y	1131353	Extracellular matrix-binding protein ebh OS=Staphylococcus aureus (strain COL) GN=ebh PE=4 SV=1
112	705	Q5HEH1|CH10_STAAC	98.5	146.21	44	9	9	Y	10416	10 kDa chaperonin OS=Staphylococcus aureus (strain COL) GN=groS PE=3 SV=1
158	400	Q5HDW0|RL23_STAAC	98.6	146.03	43	7	7	Y	10605	50S ribosomal protein L23 OS=Staphylococcus aureus (strain COL) GN=rplW PE=3 SV=1
235	278	Q5HE39|Q5HE39_STAAC	99	146.03	20	5	5	Y	38358	ATP-binding protein Mrp/Nbp35 family OS=Staphylococcus aureus (strain COL) GN=SACOL2156 PE=4 SV=1
308	248	Q5HFA2|HEM3_STAAC	99.1	145.86	31	6	6	Y	34354	Porphobilinogen deaminase OS=Staphylococcus aureus (strain COL) GN=hemC PE=3 SV=1
358	247	Q5HD12|Q5HD12_STAAC	99.1	145.74	18	7	7	Y	63757	Pyruvate oxidase OS=Staphylococcus aureus (strain COL) GN=SACOL2553 PE=3 SV=1
121	352	Q5HI89|Y633_STAAC	99	145.2	29	6	6	Y	29390	UPF0447 protein SACOL0633 OS=Staphylococcus aureus (strain COL) GN=SACOL0633 PE=3 SV=1
303	328	Q5HJB7|SCDA_STAAC	99.1	144.85	47	9	9	Y	25485	Iron-sulfur cluster repair protein ScdA OS=Staphylococcus aureus (strain COL) GN=scdA PE=2 SV=1
345	285	Q5HFU4|Q5HFU4_STAAC	99.1	144.64	28	6	6	Y	36737	Pyridine nucleotide-disulfide oxidoreductase OS=Staphylococcus aureus (strain COL) GN=SACOL1520 PE=4 SV=1
330	243	Q5HG02|MURG_STAAC	99.1	144.61	29	7	7	Y	39697	UDP-N-acetylglucosamine--N-acetylmuramyl-(pentapeptide) pyrophosphoryl-undecaprenol N-acetylglucosamine transferase OS=Staphylococcus aureus (strain COL) GN=murG PE=3 SV=1
229	188	Q5HFS4|Q5HFS4_STAAC	99.1	144.34	57	7	7	Y	17244	Transcriptional regulator Fur family OS=Staphylococcus aureus (strain COL) GN=SACOL1541 PE=4 SV=1
248	178	Q5HF34|MURC_STAAC	99.1	143.84	23	7	7	Y	49188	UDP-N-acetylmuramate--L-alanine ligase OS=Staphylococcus aureus (strain COL) GN=murC PE=3 SV=1
251	169	Q5HF45|SYY_STAAC	99.1	143.8	24	8	8	Y	47580	Tyrosine--tRNA ligase OS=Staphylococcus aureus (strain COL) GN=tyrS PE=3 SV=1
171	342	Q5HDX6|RL30_STAAC	98.9	143.73	66	8	8	Y	6554	50S ribosomal protein L30 OS=Staphylococcus aureus (strain COL) GN=rpmD PE=3 SV=1
209	198	Q5HJC1|ISPD2_STAAC	99.1	143.7	50	9	7	Y	26657	2-C-methyl-D-erythritol 4-phosphate cytidylyltransferase 2 OS=Staphylococcus aureus (strain COL) GN=ispD2 PE=3 SV=1
334	645	Q5HGE6|RECA_STAAC	99	143.33	34	10	10	Y	37657	Protein RecA OS=Staphylococcus aureus (strain COL) GN=recA PE=3 SV=1
317	229	Q5HCV3|PANB_STAAC	99.1	142.94	36	7	7	Y	29257	3-methyl-2-oxobutanoate hydroxymethyltransferase OS=Staphylococcus aureus (strain COL) GN=panB PE=3 SV=1
341	255	Q5HJC0|Q5HJC0_STAAC	99.1	142.67	24	5	5	Y	38452	Alcohol dehydrogenase zinc-containing OS=Staphylococcus aureus (strain COL) GN=SACOL0241 PE=4 SV=1
257	286	Q5HI18|Q5HI18_STAAC	99	142.41	23	5	5	Y	34887	Dihydroxyacetone kinase family protein OS=Staphylococcus aureus (strain COL) GN=SACOL0707 PE=4 SV=1
249	291	Q5HF30|Q5HF30_STAAC	99	142.29	60	7	7	Y	11856	Thioredoxin putative OS=Staphylococcus aureus (strain COL) GN=SACOL1794 PE=4 SV=1
291	269	Q5HGN5|Q5HGN5_STAAC	99.1	141.98	30	6	6	Y	34604	Pseudouridine synthase OS=Staphylococcus aureus (strain COL) GN=SACOL1209 PE=3 SV=1
319	245	Q5HH58|Q5HH58_STAAC	99.1	141.96	38	9	9	Y	37928	Lipoate-protein ligase A family protein OS=Staphylococcus aureus (strain COL) GN=SACOL1034 PE=3 SV=1
415	183	Q5HET2|Q5HET2_STAAC	99.1	141.61	15	10	10	Y	114420	Uncharacterized protein OS=Staphylococcus aureus (strain COL) GN=SACOL1899 PE=4 SV=1
146	327	Q5HGJ4|RS16_STAAC	98.9	141.08	57	5	5	Y	10235	30S ribosomal protein S16 OS=Staphylococcus aureus (strain COL) GN=rpsP PE=3 SV=1
239	224	Q5HIG3|HSLO_STAAC	99.1	140.84	30	6	6	Y	31822	33 kDa chaperonin OS=Staphylococcus aureus (strain COL) GN=hslO PE=3 SV=1
262	203	Q5HF32|Q5HF32_STAAC	99.1	140.7	40	10	10	Y	21690	Uncharacterized protein OS=Staphylococcus aureus (strain COL) GN=SACOL1792 PE=4 SV=1
234	264	Q5HI05|Q5HI05_STAAC	99.1	140.63	35	6	6	Y	23738	Uncharacterized protein OS=Staphylococcus aureus (strain COL) GN=SACOL0721 PE=4 SV=1
315	271	Q5HFQ5|Q5HFQ5_STAAC	99.1	140.62	29	6	6	Y	36061	2-oxoisovalerate dehydrogenase E1 component beta subunit OS=Staphylococcus aureus (strain COL) GN=SACOL1561 PE=4 SV=1
252	290	Q5HCW1|Q5HCW1_STAAC	99	140.52	26	6	6	Y	39537	Dihydroorotate dehydrogenase OS=Staphylococcus aureus (strain COL) GN=pyrD PE=3 SV=1
402	332	Q5HFC6|Q5HFC6_STAAC	99.1	140.49	10	5	5	Y	84254	Protein-export membrane protein SecDF OS=Staphylococcus aureus (strain COL) GN=SACOL1692 PE=3 SV=1
226	199	Q5HGR3|OTC_STAAC	99.1	139.84	32	10	7	Y	37517	Ornithine carbamoyltransferase OS=Staphylococcus aureus (strain COL) GN=argF PE=3 SV=1
258	205	Q5HHB0|CLPB_STAAC	99.1	139.77	13	8	7	Y	98303	Chaperone protein ClpB OS=Staphylococcus aureus (strain COL) GN=clpB PE=3 SV=1
306	208	Q5HGK7|Y1240_STAAC	99.1	139.7	14	7	7	Y	60516	Uncharacterized protein SACOL1240 OS=Staphylococcus aureus (strain COL) GN=SACOL1240 PE=4 SV=1
283	349	Q5HFT0|SRRA_STAAC	99.1	139.68	32	6	6	Y	28161	Transcriptional regulatory protein SrrA OS=Staphylococcus aureus (strain COL) GN=srrA PE=2 SV=1
366	623	Q5HHK8|GCSH_STAAC	95.4	139.44	31	4	4	Y	14093	Glycine cleavage system H protein OS=Staphylococcus aureus (strain COL) GN=gcvH PE=3 SV=1
323	265	Q5HDP8|Q5HDP8_STAAC	99.1	139.18	33	9	9	Y	34908	Transcriptional regulator putative OS=Staphylococcus aureus (strain COL) GN=SACOL2302 PE=4 SV=1
391	182	Q5HHE9|Q5HHE9_STAAC	99.1	138.9	37	10	10	Y	44960	DltD protein OS=Staphylococcus aureus (strain COL) GN=dltD PE=4 SV=1
371	256	Q5HFJ3|ERA_STAAC	99.1	138.9	31	6	6	Y	34329	GTPase Era OS=Staphylococcus aureus (strain COL) GN=era PE=3 SV=1
359	343	Q5HF00|Q5HF00_STAAC	98.9	138.82	19	6	6	Y	32506	N-acetylmuramoyl-L-alanine amidase family 4 OS=Staphylococcus aureus (strain COL) GN=SACOL1825 PE=4 SV=1
269	294	Q5HJF3|PFLA_STAAC	99	138.62	34	6	6	Y	28499	Pyruvate formate-lyase-activating enzyme OS=Staphylococcus aureus (strain COL) GN=pflA PE=3 SV=1
267	313	Q5HCU4|Q5HCU4_STAAC	99.1	138.03	16	7	7	Y	59749	Acetyl-CoA synthetase putative OS=Staphylococcus aureus (strain COL) GN=SACOL2624 PE=4 SV=1
296	281	Q5HEF5|REX_STAAC	99	137.81	24	5	5	Y	23599	Redox-sensing transcriptional repressor Rex OS=Staphylococcus aureus (strain COL) GN=rex PE=3 SV=1
218	167	Q5HF67|Y1756_STAAC	99.1	137.43	32	7	7	Y	39554	Uncharacterized peptidase SACOL1756 OS=Staphylococcus aureus (strain COL) GN=SACOL1756 PE=3 SV=1
250	288	Q5HE94|ATPD_STAAC	99	137.43	53	7	7	Y	20498	ATP synthase subunit delta OS=Staphylococcus aureus (strain COL) GN=atpH PE=3 SV=1
331	282	Q5HH24|QOX1_STAAC	99.1	137.42	14	6	6	Y	75229	Probable quinol oxidase subunit 1 OS=Staphylococcus aureus (strain COL) GN=qoxB PE=3 SV=1
289	240	Q5HFH6|LEPA_STAAC	99.1	137.09	13	7	7	Y	68175	Elongation factor 4 OS=Staphylococcus aureus (strain COL) GN=lepA PE=3 SV=1
395	331	Q5HJA8|Q5HJA8_STAAC	99.1	136.42	28	7	7	Y	32449	Ribokinase OS=Staphylococcus aureus (strain COL) GN=rbsK PE=1 SV=1
191	300	Q5HGH2|RRF_STAAC	99	136.25	38	5	5	Y	20353	Ribosome-recycling factor OS=Staphylococcus aureus (strain COL) GN=frr PE=3 SV=1
370	237	Q5HFJ9|SIGA_STAAC	99.1	134.69	18	6	6	Y	42171	RNA polymerase sigma factor SigA OS=Staphylococcus aureus (strain COL) GN=sigA PE=3 SV=1
284	246	Q5HGI7|SUCC_STAAC	99.1	134.6	18	6	6	Y	42056	Succinyl-CoA ligase [ADP-forming] subunit beta OS=Staphylococcus aureus (strain COL) GN=sucC PE=3 SV=1
495	478	Q5HD96|Q5HD96_STAAC	99	134.57	24	7	7	Y	39193	Glutamyl-aminopeptidase OS=Staphylococcus aureus (strain COL) GN=pepA2 PE=4 SV=1
329	238	Q5HEN6|MAP1_STAAC	99.1	134.55	29	7	7	Y	27502	Methionine aminopeptidase OS=Staphylococcus aureus (strain COL) GN=map PE=3 SV=1
344	336	Q5HHX0|Q5HHX0_STAAC	99	134.54	32	6	6	Y	32573	Tagatose-6-phosphate kinase OS=Staphylococcus aureus (strain COL) GN=fruK PE=3 SV=1
479	404	Q5HJI3|PTG3C_STAAC	99	134.17	15	8	8	Y	73925	PTS system glucose-specific EIICBA component OS=Staphylococcus aureus (strain COL) GN=ptsG PE=3 SV=1
100	380	Q5HDY2|RS13_STAAC	98.7	134.14	36	7	7	Y	13719	30S ribosomal protein S13 OS=Staphylococcus aureus (strain COL) GN=rpsM PE=3 SV=1
281	334	Q5HFD6|Q5HFD6_STAAC	98.9	134.06	51	6	6	Y	15643	Rrf2 family protein OS=Staphylococcus aureus (strain COL) GN=SACOL1681 PE=4 SV=1
408	324	Q5HEZ0|Q5HEZ0_STAAC	99	133.89	26	6	6	Y	35053	Uncharacterized protein OS=Staphylococcus aureus (strain COL) GN=SACOL1836 PE=4 SV=1
219	204	Q5HHF6|NAGD_STAAC	99.1	133.79	37	9	9	Y	27946	Protein NagD homolog OS=Staphylococcus aureus (strain COL) GN=nagD PE=3 SV=1
500	235	Q5HEL4|PUR8_STAAC	99.1	133.67	14	6	6	Y	49603	Adenylosuccinate lyase OS=Staphylococcus aureus (strain COL) GN=purB PE=3 SV=1
377	357	Q5HES8|Q5HES8_STAAC	99	133.36	58	5	5	Y	17798	Transcriptional regulator putative OS=Staphylococcus aureus (strain COL) GN=SACOL1904 PE=4 SV=1
301	353	Q5HDD4|HLGC_STAAC	99	133.18	24	5	5	Y	35626	Gamma-hemolysin component C OS=Staphylococcus aureus (strain COL) GN=hlgC PE=3 SV=1
247	410	Q5HEP4|Y1938_STAAC	98.5	133.13	69	4	4	Y	7789	UPF0435 protein SACOL1938 OS=Staphylococcus aureus (strain COL) GN=SACOL1938 PE=3 SV=1
324	320	Q5HCQ2|Q5HCQ2_STAAC	99	132.84	28	6	6	Y	20730	Isochorismatase family protein OS=Staphylococcus aureus (strain COL) GN=SACOL2667 PE=4 SV=1
355	978	Q5HJ33|Q5HJ33_STAAC	98.5	132.75	63	5	5	Y	9752	Uncharacterized protein OS=Staphylococcus aureus (strain COL) GN=SACOL0332 PE=4 SV=1
326	279	Q5HDD7|SBI_STAAC	99	132.69	10	6	6	Y	50070	Immunoglobulin-binding protein sbi OS=Staphylococcus aureus (strain COL) GN=sbi PE=3 SV=1
294	212	Q5HIE5|SYC_STAAC	99.1	132.46	20	6	6	Y	53685	Cysteine--tRNA ligase OS=Staphylococcus aureus (strain COL) GN=cysS PE=3 SV=1
382	578	Q5HHM3|Q5HHM3_STAAC	98.3	132.42	68	9	9	Y	7374	Cold shock protein CSD family OS=Staphylococcus aureus (strain COL) GN=SACOL0861 PE=3 SV=1
471	197	Q5HGJ8|Q5HGJ8_STAAC	99.1	132.07	12	10	10	Y	136748	Chromosome partition protein Smc OS=Staphylococcus aureus (strain COL) GN=smc PE=3 SV=1
187	411	Q5HHL0|Q5HHL0_STAAC	98.5	131.74	43	4	4	Y	12141	Thioredoxin putative OS=Staphylococcus aureus (strain COL) GN=SACOL0875 PE=4 SV=1
170	319	Q5HE23|ASP23_STAAC	99.1	131.53	41	7	7	Y	19191	Alkaline shock protein 23 OS=Staphylococcus aureus (strain COL) GN=asp23 PE=3 SV=1
336	252	Q5HIF4|PDXT_STAAC	99.1	130.92	40	6	6	Y	20630	Glutamine amidotransferase subunit PdxT OS=Staphylococcus aureus (strain COL) GN=pdxT PE=3 SV=1
188	605	Q5HIJ8|Y521_STAAC	98.7	130.84	50	8	8	Y	11597	Nucleoid-associated protein SACOL0521 OS=Staphylococcus aureus (strain COL) GN=SACOL0521 PE=3 SV=1
369	382	Q5HFQ1|ARGR_STAAC	98.7	130.43	31	4	4	Y	17098	Arginine repressor OS=Staphylococcus aureus (strain COL) GN=argR PE=3 SV=1
285	297	Q5HFA4|HEM2_STAAC	99	129.98	19	4	4	N	36583	Delta-aminolevulinic acid dehydratase OS=Staphylococcus aureus (strain COL) GN=hemB PE=3 SV=1
142	362	Q5HID8|RL11_STAAC	98.8	129.15	29	4	4	Y	14873	50S ribosomal protein L11 OS=Staphylococcus aureus (strain COL) GN=rplK PE=3 SV=2
459	276	Q5HDS3|Q5HDS3_STAAC	99	129.04	32	8	8	Y	34011	Iron compound ABC transporter iron compound-binding protein OS=Staphylococcus aureus (strain COL) GN=SACOL2277 PE=4 SV=1
346	346	Q5HIB5|AZO1_STAAC	98.9	128.9	38	3	3	N	20912	FMN-dependent NADPH-azoreductase OS=Staphylococcus aureus (strain COL) GN=azo1 PE=3 SV=1
210	361	Q5HJ91|ESXA_STAAC	98.8	128.89	45	4	4	Y	11036	Virulence factor EsxA OS=Staphylococcus aureus (strain COL) GN=esxA PE=3 SV=1
347	339	Q5HIR6|AHPF_STAAC	99.1	128.87	23	9	9	Y	54721	Alkyl hydroperoxide reductase subunit F OS=Staphylococcus aureus (strain COL) GN=ahpF PE=3 SV=1
381	301	Q5HGK8|Q5HGK8_STAAC	99	128.23	56	6	6	Y	13385	Uncharacterized protein OS=Staphylococcus aureus (strain COL) GN=SACOL1239 PE=4 SV=1
313	215	Q5HGJ5|Q5HGJ5_STAAC	99.1	128.03	29	10	10	Y	50705	Signal recognition particle protein OS=Staphylococcus aureus (strain COL) GN=ffh PE=3 SV=1
383	425	Q5HDI5|Q5HDI5_STAAC	99	127.91	30	9	9	Y	36570	Alcohol dehydrogenase zinc-containing OS=Staphylococcus aureus (strain COL) GN=SACOL2367 PE=4 SV=1
385	284	Q5HFK2|Q5HFK2_STAAC	99.1	127.55	17	6	6	Y	51081	ATP-dependent RNA helicase DEAD/DEAH box family OS=Staphylococcus aureus (strain COL) GN=SACOL1615 PE=4 SV=1
339	217	Q5HF73|ACCD_STAAC	99.1	127.53	42	9	9	Y	31872	Acetyl-coenzyme A carboxylase carboxyl transferase subunit beta OS=Staphylococcus aureus (strain COL) GN=accD PE=1 SV=1
439	321	Q5HI67|Q5HI67_STAAC	99.1	127.51	37	6	6	Y	35460	Oxidoreductase aldo/keto reductase family OS=Staphylococcus aureus (strain COL) GN=SACOL0655 PE=4 SV=1
357	356	Q5HEW1|SPLB_STAAC	98.8	127.4	15	4	4	Y	26096	Serine protease SplB OS=Staphylococcus aureus (strain COL) GN=splB PE=3 SV=1
337	359	Q5HIS2|Q5HIS2_STAAC	98.8	127.37	74	5	5	Y	10789	Conserved domain protein OS=Staphylococcus aureus (strain COL) GN=SACOL0445 PE=4 SV=1
307	323	Q5HH38|MENB_STAAC	99.1	126.94	30	7	7	Y	30426	1 4-Dihydroxy-2-naphthoyl-CoA synthase OS=Staphylococcus aureus (strain COL) GN=menB PE=1 SV=1
433	268	Q5HEU3|HEMH_STAAC	99	126.89	21	5	5	Y	35056	Ferrochelatase OS=Staphylococcus aureus (strain COL) GN=hemH PE=3 SV=1
396	275	Q5HDD3|HLGB_STAAC	99	126.33	18	5	5	Y	36711	Gamma-hemolysin component B OS=Staphylococcus aureus (strain COL) GN=hlgB PE=3 SV=1
141	329	Q5HHK9|Q5HHK9_STAAC	98.9	126.32	58	4	4	Y	13600	Arsenate reductase putative OS=Staphylococcus aureus (strain COL) GN=SACOL0876 PE=1 SV=1
298	372	Q5HF85|COAE_STAAC	99	126.26	29	6	6	Y	23623	Dephospho-CoA kinase OS=Staphylococcus aureus (strain COL) GN=coaE PE=3 SV=1
316	299	Q5HH21|FOLD_STAAC	99	125.78	20	4	4	N	30844	Bifunctional protein FolD OS=Staphylococcus aureus (strain COL) GN=folD PE=3 SV=1
275	490	Q5HHQ0|CLPP_STAAC	98.8	125.19	31	5	5	Y	21514	ATP-dependent Clp protease proteolytic subunit OS=Staphylococcus aureus (strain COL) GN=clpP PE=3 SV=1
367	266	Q5HEP5|Q5HEP5_STAAC	99.1	125.18	19	6	6	Y	47118	Aminopeptidase PepS OS=Staphylococcus aureus (strain COL) GN=pepS PE=4 SV=1
240	466	Q5HF94|RL20_STAAC	97.9	123.58	34	7	7	Y	13686	50S ribosomal protein L20 OS=Staphylococcus aureus (strain COL) GN=rplT PE=3 SV=1
364	364	Q5HDI7|Y2365_STAAC	99	123.53	29	4	4	Y	23362	Uncharacterized lipoprotein SACOL2365 OS=Staphylococcus aureus (strain COL) GN=SACOL2365 PE=4 SV=1
388	287	Q5HJE1|Q5HJE1_STAAC	99.1	123.52	16	7	7	Y	55431	ABC transporter substrate-binding protein OS=Staphylococcus aureus (strain COL) GN=SACOL0217 PE=4 SV=1
536	523	Q5HJ70|Q5HJ70_STAAC	95.3	123.43	23	4	1	Y	20039	Uncharacterized protein OS=Staphylococcus aureus (strain COL) GN=SACOL0293 PE=4 SV=1
404	325	Q5HHQ8|HPRK_STAAC	99	122.77	28	7	7	Y	34482	HPr kinase/phosphorylase OS=Staphylococcus aureus (strain COL) GN=hprK PE=3 SV=1
465	428	Q5HE66|LUXS_STAAC	98.8	122.33	35	5	5	Y	17514	S-ribosylhomocysteine lyase OS=Staphylococcus aureus (strain COL) GN=luxS PE=3 SV=1
271	306	Q5HJC5|ISPD1_STAAC	99.1	121.88	34	6	4	Y	26575	2-C-methyl-D-erythritol 4-phosphate cytidylyltransferase 1 OS=Staphylococcus aureus (strain COL) GN=ispD1 PE=3 SV=1
181	416	Q5HDX4|RL18_STAAC	98.4	121.83	29	7	7	Y	13097	50S ribosomal protein L18 OS=Staphylococcus aureus (strain COL) GN=rplR PE=3 SV=1
397	350	Q5HEZ1|Q5HEZ1_STAAC	99	121.79	19	5	5	Y	31472	Oxidoreductase aldo/keto reductase family OS=Staphylococcus aureus (strain COL) GN=SACOL1835 PE=4 SV=1
222	895	Q5HGK0|ACP_STAAC	91.9	121.4	27	5	4	Y	8549	Acyl carrier protein OS=Staphylococcus aureus (strain COL) GN=acpP PE=1 SV=1
434	272	Q5HI58|Q5HI58_STAAC	99.1	121.37	27	7	7	Y	33255	Iron compound ABC transporter iron compound-binding protein putative OS=Staphylococcus aureus (strain COL) GN=SACOL0665 PE=4 SV=1
318	231	Q5HIC5|PPAT_STAAC	99.1	121.26	16	5	5	Y	42891	Putative pyridoxal phosphate-dependent acyltransferase OS=Staphylococcus aureus (strain COL) GN=SACOL0596 PE=3 SV=1
429	731	Q5HIR8|Q5HIR8_STAAC	98.8	120.5	20	4	4	Y	23664	Uncharacterized protein OS=Staphylococcus aureus (strain COL) GN=SACOL0449 PE=4 SV=1
411	242	Q5HGH3|PYRH_STAAC	99.1	120.48	25	6	6	Y	26145	Uridylate kinase OS=Staphylococcus aureus (strain COL) GN=pyrH PE=3 SV=1
467	283	Q5HD16|Q5HD16_STAAC	99	119.38	20	6	6	Y	36848	Esterase putative OS=Staphylococcus aureus (strain COL) GN=SACOL2549 PE=4 SV=1
348	407	Q5HGT5|Q5HGT5_STAAC	98.6	119.2	12	7	7	Y	65503	Succinate dehydrogenase flavoprotein subunit OS=Staphylococcus aureus (strain COL) GN=sdhA PE=4 SV=1
393	225	Q5HE42|Q5HE42_STAAC	99.1	119.11	22	6	6	Y	34625	Uncharacterized protein OS=Staphylococcus aureus (strain COL) GN=SACOL2152 PE=4 SV=1
447	303	Q5HI31|TAGH_STAAC	99	118.99	23	5	5	Y	29762	Teichoic acids export ATP-binding protein TagH OS=Staphylococcus aureus (strain COL) GN=tagH PE=3 SV=1
352	735	Q5HIG7|Q5HIG7_STAAC	98.2	118.93	47	6	5	Y	14812	General stress protein 13 OS=Staphylococcus aureus (strain COL) GN=SACOL0552 PE=4 SV=1
394	385	Q5HHT2|MURB_STAAC	98.7	118.9	15	5	5	Y	33754	UDP-N-acetylenolpyruvoylglucosamine reductase OS=Staphylococcus aureus (strain COL) GN=murB PE=3 SV=1
390	296	Q5HGJ7|Q5HGJ7_STAAC	99.1	118.88	13	5	5	Y	46590	Signal recognition particle receptor FtsY OS=Staphylococcus aureus (strain COL) GN=ftsY PE=3 SV=1
589	338	Q5HDT4|MOEA_STAAC	99	118.12	20	7	7	Y	45017	Molybdopterin molybdenumtransferase OS=Staphylococcus aureus (strain COL) GN=moeA PE=3 SV=1
321	662	Q5HDQ9|SSAA2_STAAC	98.7	118.1	17	4	4	Y	29327	Staphylococcal secretory antigen ssaA2 OS=Staphylococcus aureus (strain COL) GN=ssaA2 PE=3 SV=1
343	230	Q5HGD6|MUTS_STAAC	99.1	117.98	9	6	6	Y	99904	DNA mismatch repair protein MutS OS=Staphylococcus aureus (strain COL) GN=mutS PE=3 SV=1
278	388	Q5HD32|Q5HD32_STAAC	98.6	117.8	54	4	4	Y	10548	Acetyltransferase GNAT family OS=Staphylococcus aureus (strain COL) GN=SACOL2532 PE=1 SV=1
435	277	Q5HE59|Q5HE59_STAAC	99	116.97	12	4	4	N	52947	Uncharacterized protein OS=Staphylococcus aureus (strain COL) GN=SACOL2133 PE=4 SV=1
520	390	Q5HEL9|Q5HEL9_STAAC	99	116.36	15	5	5	Y	45381	Staphylococcus aureus sex pheromone OS=Staphylococcus aureus (strain COL) GN=camS PE=4 SV=1
270	366	Q5HFP9|EX7S_STAAC	98.8	116.24	87	5	5	Y	8760	Exodeoxyribonuclease 7 small subunit OS=Staphylococcus aureus (strain COL) GN=xseB PE=3 SV=1
422	443	Q5HED8|Q5HED8_STAAC	99	116.17	11	6	6	Y	80935	S1 RNA binding domain protein OS=Staphylococcus aureus (strain COL) GN=SACOL2053 PE=4 SV=1
445	239	Q5HHQ9|UVRA_STAAC	99.1	116.11	9	8	8	Y	105368	UvrABC system protein A OS=Staphylococcus aureus (strain COL) GN=uvrA PE=3 SV=1
297	316	Q5HEN2|Q5HEN2_STAAC	99	115.62	21	4	4	N	27430	Cobyric acid synthase putative OS=Staphylococcus aureus (strain COL) GN=SACOL1950 PE=4 SV=1
392	378	Q5HEP0|VRAR_STAAC	99	115.12	26	4	4	Y	23545	Response regulator protein VraR OS=Staphylococcus aureus (strain COL) GN=vraR PE=3 SV=1
167	391	Q5HDW6|RL29_STAAC	98.7	114.43	51	4	4	Y	8090	50S ribosomal protein L29 OS=Staphylococcus aureus (strain COL) GN=rpmC PE=3 SV=1
398	304	Q5HH88|SYW_STAAC	99	114.36	18	4	4	N	36909	Tryptophan--tRNA ligase OS=Staphylococcus aureus (strain COL) GN=trpS PE=3 SV=1
494	270	Q5HIB4|SDRC_STAAC	99	114.15	6	5	4	Y	102916	Serine-aspartate repeat-containing protein C OS=Staphylococcus aureus (strain COL) GN=sdrC PE=3 SV=1
428	355	Q5HI82|Q5HI82_STAAC	99	113.42	13	4	4	Y	48474	Pyridine nucleotide-disulfide oxidoreductase OS=Staphylococcus aureus (strain COL) GN=SACOL0640 PE=3 SV=1
443	967	Q5HHE8|Q5HHE8_STAAC	98	113.38	78	4	4	Y	7965	NifU domain protein OS=Staphylococcus aureus (strain COL) GN=SACOL0939 PE=4 SV=1
449	354	Q5HD54|GTAB_STAAC	98.9	112.93	28	5	5	Y	32451	UTP--glucose-1-phosphate uridylyltransferase OS=Staphylococcus aureus (strain COL) GN=gtaB PE=3 SV=1
259	292	Q5HDT2|MOAB_STAAC	99	112.6	25	4	4	N	18500	Molybdenum cofactor biosynthesis protein B OS=Staphylococcus aureus (strain COL) GN=moaB PE=3 SV=1
454	534	Q5HJ68|Q5HJ68_STAAC	97	112.44	23	3	2	Y	19989	Uncharacterized protein OS=Staphylococcus aureus (strain COL) GN=SACOL0295 PE=4 SV=1
470	392	Q5HIG5|HPRT_STAAC	98.9	112.25	39	6	6	Y	20154	Hypoxanthine-guanine phosphoribosyltransferase OS=Staphylococcus aureus (strain COL) GN=hpt PE=3 SV=1
274	308	Q5HGZ4|Y1099_STAAC	99	112.21	75	5	5	Y	8752	UPF0356 protein SACOL1099 OS=Staphylococcus aureus (strain COL) GN=SACOL1099 PE=3 SV=1
386	556	Q5HFR1|Q5HFR1_STAAC	96.5	111.96	17	4	4	Y	40244	Peptidase M20/M25/M40 family OS=Staphylococcus aureus (strain COL) GN=SACOL1555 PE=4 SV=1
351	386	Q5HJ61|Q5HJ61_STAAC	98.7	111.5	14	4	4	N	33352	Acid phosphatase5'-nucleotidase lipoprotein e(P4) family OS=Staphylococcus aureus (strain COL) GN=SACOL0303 PE=4 SV=1
484	427	Q5HJZ1|GYRB_STAAC	98.9	111.24	11	6	6	Y	72512	DNA gyrase subunit B OS=Staphylococcus aureus (strain COL) GN=gyrB PE=3 SV=3
374	563	Q5HDV7|RS10_STAAC	98.9	111.11	51	7	7	Y	11579	30S ribosomal protein S10 OS=Staphylococcus aureus (strain COL) GN=rpsJ PE=3 SV=1
451	409	Q5HCQ4|Q5HCQ4_STAAC	98.5	110.9	7	5	5	Y	108716	Phage infection protein putative OS=Staphylococcus aureus (strain COL) GN=SACOL2665 PE=4 SV=1
486	421	Q5HJB9|Q5HJB9_STAAC	98.5	110.7	12	5	2	Y	66075	Teichoic acid biosynthesis protein putative OS=Staphylococcus aureus (strain COL) GN=SACOL0242 PE=4 SV=1
387	549	Q5HFG9|Q5HFG9_STAAC	98.8	110.55	39	3	3	Y	13482	Ribosomal silencing factor RsfS OS=Staphylococcus aureus (strain COL) GN=rsfS PE=3 SV=1
245	377	Q5HDI9|Q5HDI9_STAAC	98.7	110.39	7	4	2	Y	56642	L-lactate permease OS=Staphylococcus aureus (strain COL) GN=SACOL2363 PE=4 SV=1
496	368	Q5HET6|Q5HET6_STAAC	98.8	110.28	36	4	4	Y	13212	Uncharacterized protein OS=Staphylococcus aureus (strain COL) GN=SACOL1895 PE=4 SV=1
312	227	Q5HE79|Q5HE79_STAAC	99.1	110.01	16	6	6	Y	49958	Transcription termination factor Rho OS=Staphylococcus aureus (strain COL) GN=rho PE=3 SV=1
468	707	Q5HHG0|LIPA_STAAC	97.5	109.93	18	4	4	Y	34885	Lipoyl synthase OS=Staphylococcus aureus (strain COL) GN=lipA PE=3 SV=1
365	539	P60071|RSBV_STAAC	98.2	109.83	55	4	4	Y	12205	Anti-sigma-B factor antagonist OS=Staphylococcus aureus (strain COL) GN=rsbV PE=3 SV=2
406	312	Q5HE76|MURA2_STAAC	99	109.53	20	6	6	Y	45075	UDP-N-acetylglucosamine 1-carboxyvinyltransferase 2 OS=Staphylococcus aureus (strain COL) GN=murA2 PE=3 SV=1
492	431	Q5HH28|Q5HH28_STAAC	98.3	109.37	18	4	4	Y	45685	Transcriptional regulator putative OS=Staphylococcus aureus (strain COL) GN=SACOL1065 PE=4 SV=1
490	379	Q5HEA7|THIM_STAAC	98.7	109.35	15	3	3	Y	28090	Hydroxyethylthiazole kinase OS=Staphylococcus aureus (strain COL) GN=thiM PE=3 SV=1
472	530	Q5HE28|Q5HE28_STAAC	98.8	108.58	16	3	3	Y	36591	Iron compound ABC transporter iron compound-binding protein OS=Staphylococcus aureus (strain COL) GN=SACOL2167 PE=4 SV=1
309	314	Q5HD38|Q5HD38_STAAC	99	108.26	19	4	4	N	25804	ABC transporter ATP-binding protein OS=Staphylococcus aureus (strain COL) GN=SACOL2525 PE=3 SV=1
440	351	Q5HDQ7|Q5HDQ7_STAAC	98.9	107.85	15	4	4	Y	40742	NAD/NADP octopine/nopaline dehydrogenase family protein OS=Staphylococcus aureus (strain COL) GN=SACOL2293 PE=4 SV=1
400	709	Q5HGX8|Y1115_STAAC	98.6	107.81	25	4	4	Y	24020	UPF0637 protein SACOL1115 OS=Staphylococcus aureus (strain COL) GN=SACOL1115 PE=3 SV=1
529	422	Q5HFF1|URK_STAAC	98.9	107.21	33	6	6	Y	23505	Uridine kinase OS=Staphylococcus aureus (strain COL) GN=udk PE=3 SV=1
514	307	Q5HI25|Q5HI25_STAAC	99	107.08	9	4	4	N	64051	ABC transporter ATP-binding/permease protein OS=Staphylococcus aureus (strain COL) GN=abcA PE=3 SV=1
414	412	Q5HER1|Q5HER1_STAAC	99	107.07	31	4	4	Y	17260	Bacterioferritin comigratory protein OS=Staphylococcus aureus (strain COL) GN=bcp PE=4 SV=1
231	446	Q5HDW8|RL14_STAAC	98.8	107.06	39	7	7	Y	13135	50S ribosomal protein L14 OS=Staphylococcus aureus (strain COL) GN=rplN PE=3 SV=1
588	330	Q5HFQ2|Q5HFQ2_STAAC	98.9	106.72	9	4	4	Y	64296	DNA repair protein RecN OS=Staphylococcus aureus (strain COL) GN=recN PE=3 SV=1
509	347	Q5HCQ9|ISAB_STAAC	98.9	106.52	25	4	4	Y	19370	Immunodominant staphylococcal antigen B OS=Staphylococcus aureus (strain COL) GN=isaB PE=3 SV=1
421	597	Q5HGZ3|DEF_STAAC	98.3	106.38	43	6	6	Y	20560	Peptide deformylase OS=Staphylococcus aureus (strain COL) GN=def PE=1 SV=1
409	516	Q5HHW9|Q5HHW9_STAAC	97.2	106.23	8	2	2	N	43116	N-acetylglucosamine-6-phosphate deacetylase OS=Staphylococcus aureus (strain COL) GN=nagA PE=3 SV=1
455	358	Q5HF95|Q5HF95_STAAC	98.9	105.98	24	6	6	Y	22946	MutT/nudix family protein OS=Staphylococcus aureus (strain COL) GN=SACOL1724 PE=4 SV=1
372	719	Q5HE93|ATPF_STAAC	97.6	105.18	22	3	3	Y	19539	ATP synthase subunit b OS=Staphylococcus aureus (strain COL) GN=atpF PE=3 SV=1
446	426	Q5HG20|DCDA_STAAC	98.4	105.15	16	5	5	Y	47035	Diaminopimelate decarboxylase OS=Staphylococcus aureus (strain COL) GN=lysA PE=3 SV=1
551	413	Q5HEM4|DAGK_STAAC	98.5	105.14	25	5	5	Y	34887	Diacylglycerol kinase OS=Staphylococcus aureus (strain COL) GN=dagK PE=3 SV=1
163	697	Q5HHF0|DLTC_STAAC	94.6	104.95	33	3	3	Y	9063	D-alanine--poly(phosphoribitol) ligase subunit 2 OS=Staphylococcus aureus (strain COL) GN=dltC PE=3 SV=1
292	765	Q5HFH5|RS20_STAAC	93.8	104.91	23	3	3	Y	9021	30S ribosomal protein S20 OS=Staphylococcus aureus (strain COL) GN=rpsT PE=3 SV=1
427	531	Q5HHW4|SAER_STAAC	98.5	104.86	19	4	4	Y	26858	Response regulator SaeR OS=Staphylococcus aureus (strain COL) GN=saeR PE=1 SV=1
310	405	Q5HFP4|Q5HFP4_STAAC	98.3	104.3	25	4	4	Y	17122	Acetyl-CoA carboxylase biotin carboxyl carrier protein OS=Staphylococcus aureus (strain COL) GN=accB PE=4 SV=1
389	419	Q5HG45|FEMA_STAAC	98.9	104.23	10	4	4	Y	49124	Aminoacyltransferase FemA OS=Staphylococcus aureus (strain COL) GN=femA PE=3 SV=2
461	456	Q5HIB6|Q5HIB6_STAAC	98.1	104.02	21	5	5	Y	31841	Hydrolase haloacid dehalogenase-like family OS=Staphylococcus aureus (strain COL) GN=SACOL0606 PE=4 SV=1
264	877	Q5HFE7|Y1670_STAAC	92.3	104.02	41	3	3	Y	11949	UPF0473 protein SACOL1670 OS=Staphylococcus aureus (strain COL) GN=SACOL1670 PE=3 SV=1
573	311	Q5HGL4|RLMN_STAAC	99	103.99	17	4	4	Y	41905	Probable dual-specificity RNA methyltransferase RlmN OS=Staphylococcus aureus (strain COL) GN=rlmN PE=3 SV=1
458	233	Q5HEK9|NADE_STAAC	99.1	103.94	39	7	7	Y	30697	NH(3)-dependent NAD(+) synthetase OS=Staphylococcus aureus (strain COL) GN=nadE PE=3 SV=1
378	383	Q5HCR6|ARCR_STAAC	98.7	103.73	22	3	3	Y	27428	HTH-type transcriptional regulator ArcR OS=Staphylococcus aureus (strain COL) GN=arcR PE=3 SV=2
424	373	Q5HET7|Q5HET7_STAAC	98.7	103.63	24	3	3	N	15945	HIT family protein OS=Staphylococcus aureus (strain COL) GN=SACOL1894 PE=4 SV=1
460	485	Q5HEW7|Q5HEW7_STAAC	97.5	103.37	8	3	3	Y	59444	Type I restriction-modification system M subunit OS=Staphylococcus aureus (strain COL) GN=hsdM2 PE=4 SV=1
460	486	Q5HIP1|Q5HIP1_STAAC	97.5	103.37	8	3	3	Y	59445	Type I restriction-modification system M subunit OS=Staphylococcus aureus (strain COL) GN=hsdM1 PE=4 SV=1
423	430	Q5HIA4|Q5HIA4_STAAC	98.3	103.21	29	4	4	Y	19558	SIS domain protein OS=Staphylococcus aureus (strain COL) GN=SACOL0618 PE=4 SV=1
448	273	Q5HFI9|Q5HFI9_STAAC	99	103	22	5	5	N	33930	PhoH family protein OS=Staphylococcus aureus (strain COL) GN=SACOL1628 PE=4 SV=1
542	401	Q5HHM4|NUC_STAAC	98.5	102.91	17	4	4	N	25120	Thermonuclease OS=Staphylococcus aureus (strain COL) GN=nuc PE=3 SV=1
523	463	Q5HFG2|MTNN_STAAC	98.4	102.33	34	5	5	Y	24534	5'-methylthioadenosine/S-adenosylhomocysteine nucleosidase OS=Staphylococcus aureus (strain COL) GN=mtnN PE=3 SV=1
295	520	Q5HER3|PERR_STAAC	97.1	102.28	22	2	2	Y	17183	Peroxide-responsive repressor PerR OS=Staphylococcus aureus (strain COL) GN=perR PE=3 SV=1
263	818	Q5HFB8|RL27_STAAC	92.4	102	26	4	4	Y	10315	50S ribosomal protein L27 OS=Staphylococcus aureus (strain COL) GN=rpmA PE=3 SV=1
349	496	Q5HGK4|PLSX_STAAC	97.4	101.73	8	2	2	Y	35431	Phosphate acyltransferase OS=Staphylococcus aureus (strain COL) GN=plsX PE=3 SV=1
363	309	Q5HG65|PARE_STAAC	99	101.65	8	4	4	Y	74364	DNA topoisomerase 4 subunit B OS=Staphylococcus aureus (strain COL) GN=parE PE=3 SV=2
225	1851	Q5HFK9|RL331_STAAC	69.9	101	29	3	3	Y	5873	50S ribosomal protein L33 1 OS=Staphylococcus aureus (strain COL) GN=rpmG1 PE=3 SV=1
225	1852	Q5HG85|RL332_STAAC	69.9	101	29	3	3	Y	5932	50S ribosomal protein L33 2 OS=Staphylococcus aureus (strain COL) GN=rpmG2 PE=3 SV=1
293	335	Q5HHC9|Q5HHC9_STAAC	98.9	100.91	15	4	4	Y	42109	NADH-dependent flavin oxidoreductase Oye family OS=Staphylococcus aureus (strain COL) GN=SACOL0959 PE=4 SV=1
453	402	Q5HE34|URTF_STAAC	99	100.76	16	8	8	Y	44894	Probable uridylyltransferase SACOL2161 OS=Staphylococcus aureus (strain COL) GN=SACOL2161 PE=3 SV=1
502	363	Q5HF86|G3P2_STAAC	98.8	100.34	18	4	4	N	36979	Glyceraldehyde-3-phosphate dehydrogenase 2 OS=Staphylococcus aureus (strain COL) GN=gapA2 PE=3 SV=1
519	374	Q5HHB9|LEP_STAAC	98.9	100.27	33	6	6	Y	21678	Signal peptidase IB OS=Staphylococcus aureus (strain COL) GN=spsB PE=3 SV=2
517	519	Q5HFU2|EBPS_STAAC	97.2	99.5	10	3	3	Y	53221	Elastin-binding protein EbpS OS=Staphylococcus aureus (strain COL) GN=ebpS PE=3 SV=3
256	305	Q5HI51|SARA_STAAC	99	99.49	33	4	4	N	14718	Transcriptional regulator SarA OS=Staphylococcus aureus (strain COL) GN=sarA PE=1 SV=3
441	616	Q5HID4|Q5HID4_STAAC	98.5	99.23	20	3	3	Y	22680	Uncharacterized protein OS=Staphylococcus aureus (strain COL) GN=SACOL0587 PE=4 SV=1
489	389	Q5HIK2|Q5HIK2_STAAC	98.5	99.22	6	3	3	Y	63514	Alpha alpha-phosphotrehalase OS=Staphylococcus aureus (strain COL) GN=treC PE=4 SV=1
474	649	Q5HFZ8|Y1460_STAAC	98.7	98.97	15	4	4	Y	30645	DegV domain-containing protein SACOL1460 OS=Staphylococcus aureus (strain COL) GN=SACOL1460 PE=4 SV=1
399	479	Q5HE32|Y2163_STAAC	97.7	98.65	64	5	5	Y	10006	UPF0457 protein SACOL2163 OS=Staphylococcus aureus (strain COL) GN=SACOL2163 PE=3 SV=1
481	442	Q5HGI1|TRMFO_STAAC	98.2	98.55	11	3	3	Y	48371	Methylenetetrahydrofolate--tRNA-(uracil-5-)-methyltransferase TrmFO OS=Staphylococcus aureus (strain COL) GN=trmFO PE=3 SV=1
403	500	Q5HJQ9|Q5HJQ9_STAAC	96.6	98.14	8	4	2	Y	56191	L-lactate permease OS=Staphylococcus aureus (strain COL) GN=SACOL0093 PE=4 SV=1
462	341	Q5HGJ3|RIMM_STAAC	98.8	97.9	32	4	4	Y	19073	Ribosome maturation factor RimM OS=Staphylococcus aureus (strain COL) GN=rimM PE=3 SV=1
464	587	Q5HI37|Q5HI37_STAAC	96.2	97.81	17	5	5	Y	34741	ABC transporter substrate-binding protein OS=Staphylococcus aureus (strain COL) GN=SACOL0688 PE=3 SV=1
561	508	Q5HFZ7|DYR_STAAC	97.3	97.79	25	4	4	Y	18251	Dihydrofolate reductase OS=Staphylococcus aureus (strain COL) GN=folA PE=3 SV=3
571	492	Q5HDG0|Q5HDG0_STAAC	97.5	97.69	6	2	2	Y	59431	Respiratory nitrate reductase beta subunit OS=Staphylococcus aureus (strain COL) GN=narH PE=4 SV=1
554	630	Q5HDR7|UREE_STAAC	98.1	97.68	37	4	4	Y	17340	Urease accessory protein UreE OS=Staphylococcus aureus (strain COL) GN=ureE PE=3 SV=1
516	370	Q5HFI4|Q5HFI4_STAAC	98.8	97.64	9	4	4	Y	50956	Uncharacterized protein OS=Staphylococcus aureus (strain COL) GN=SACOL1633 PE=4 SV=1
569	345	Q5HEU4|Q5HEU4_STAAC	98.9	97.58	23	7	7	Y	51984	Protoporphyrinogen oxidase OS=Staphylococcus aureus (strain COL) GN=hemG PE=4 SV=1
477	618	Q5HEA5|TENA_STAAC	98.8	96.86	21	4	4	Y	26729	Putative thiaminase-2 OS=Staphylococcus aureus (strain COL) GN=tenA PE=3 SV=1
488	489	Q5HJC3|Q5HJC3_STAAC	98.2	96.58	9	4	1	Y	66087	Teichoic acid biosynthesis protein putative OS=Staphylococcus aureus (strain COL) GN=SACOL0238 PE=4 SV=1
580	2163	Q5HH80|Y1009_STAAC	84.4	96.57	35	3	3	Y	13529	UPF0738 protein SACOL1009 OS=Staphylococcus aureus (strain COL) GN=SACOL1009 PE=3 SV=1
487	667	Q5HID0|RS12_STAAC	94.9	96.53	20	2	2	Y	15343	30S ribosomal protein S12 OS=Staphylococcus aureus (strain COL) GN=rpsL PE=3 SV=1
368	964	Q5HFZ5|Y1464_STAAC	90.7	96.4	29	2	2	Y	16014	UPF0403 protein SACOL1464 OS=Staphylococcus aureus (strain COL) GN=SACOL1464 PE=3 SV=1
485	704	Q5HGJ9|RNC_STAAC	96.1	96.02	12	3	3	Y	27922	Ribonuclease 3 OS=Staphylococcus aureus (strain COL) GN=rnc PE=3 SV=1
340	477	Q5HGG1|RBFA_STAAC	97	95.76	40	3	3	Y	13515	Ribosome-binding factor A OS=Staphylococcus aureus (strain COL) GN=rbfA PE=3 SV=1
613	725	Q5HHF7|Q5HHF7_STAAC	97.4	95.43	29	2	2	Y	16779	Uncharacterized protein OS=Staphylococcus aureus (strain COL) GN=SACOL0930 PE=4 SV=1
633	471	Q5HEN1|Q5HEN1_STAAC	98.5	95.19	11	4	4	Y	49206	Mur ligase family protein OS=Staphylococcus aureus (strain COL) GN=SACOL1951 PE=4 SV=1
463	393	Q5HEJ1|Q5HEJ1_STAAC	98.9	95.14	26	5	5	Y	21916	Uncharacterized protein OS=Staphylococcus aureus (strain COL) GN=SACOL1992 PE=4 SV=1
530	435	Q5HFM4|GCSPB_STAAC	98.9	95.08	10	4	4	Y	54781	Probable glycine dehydrogenase (decarboxylating) subunit 2 OS=Staphylococcus aureus (strain COL) GN=gcvPB PE=3 SV=1
476	663	Q5HFM3|GCSPA_STAAC	97.1	94.98	7	2	2	Y	49716	Probable glycine dehydrogenase (decarboxylating) subunit 1 OS=Staphylococcus aureus (strain COL) GN=gcvPA PE=3 SV=1
244	403	Q5HDU2|SARV_STAAC	98.5	94.86	26	4	3	Y	13986	HTH-type transcriptional regulator SarV OS=Staphylococcus aureus (strain COL) GN=sarV PE=3 SV=1
342	646	Q5HHZ0|Q5HHZ0_STAAC	95.2	94.78	30	2	2	Y	11324	Uncharacterized protein OS=Staphylococcus aureus (strain COL) GN=SACOL0738 PE=4 SV=1
354	554	Q5HHS7|PEPT_STAAC	98.9	94.51	14	5	5	Y	45848	Peptidase T OS=Staphylococcus aureus (strain COL) GN=pepT PE=3 SV=1
356	562	Q5HDK3|Q5HDK3_STAAC	97.9	94.22	26	5	5	Y	23024	Drug transporter putative OS=Staphylococcus aureus (strain COL) GN=SACOL2348 PE=4 SV=1
482	715	Q5HFM6|Q5HFM6_STAAC	94.7	93.83	13	3	3	Y	31881	Octanoyltransferase LipM OS=Staphylococcus aureus (strain COL) GN=lipM PE=3 SV=1
475	432	Q5HGD2|GLPK_STAAC	98.9	93.79	15	6	6	Y	55626	Glycerol kinase OS=Staphylococcus aureus (strain COL) GN=glpK PE=1 SV=1
673	333	Q5HIJ9|Q5HIJ9_STAAC	99	93.73	12	5	5	Y	63499	DNA polymerase III gamma and tau subunits OS=Staphylococcus aureus (strain COL) GN=dnaX PE=4 SV=1
608	1216	Q5HGG6|RIMP_STAAC	94	93.46	25	3	3	Y	17627	Ribosome maturation factor RimP OS=Staphylococcus aureus (strain COL) GN=rimP PE=3 SV=1
376	440	Q5HF92|IF3_STAAC	96	92.8	17	2	2	N	20214	Translation initiation factor IF-3 OS=Staphylococcus aureus (strain COL) GN=infC PE=3 SV=1
515	488	Q5HGL5|Q5HGL5_STAAC	97.6	92.07	7	2	2	Y	50087	Sun protein OS=Staphylococcus aureus (strain COL) GN=sun PE=3 SV=1
417	589	Q5HI32|TAGA_STAAC	96.1	92	8	1	1	N	29133	Putative N-acetylmannosaminyltransferase OS=Staphylococcus aureus (strain COL) GN=tagA PE=3 SV=1
512	494	Q5HGZ9|Q5HGZ9_STAAC	97.5	91.99	6	2	2	N	51146	Cytochrome d ubiquinol oxidase subunit I OS=Staphylococcus aureus (strain COL) GN=cydA PE=4 SV=1
418	396	O86490|RF3_STAAC	98.6	91.9	7	4	4	N	59602	Peptide chain release factor 3 OS=Staphylococcus aureus (strain COL) GN=prfC PE=3 SV=2
493	381	Q5HG14|TELL_STAAC	98.7	91.7	26	6	6	Y	43407	TelA-like protein SACOL1441 OS=Staphylococcus aureus (strain COL) GN=SACOL1441 PE=3 SV=1
407	460	Q5HIA9|GCH4_STAAC	97.9	91.41	12	4	4	Y	33482	GTP cyclohydrolase FolE2 OS=Staphylococcus aureus (strain COL) GN=folE2 PE=3 SV=1
534	437	Q5HFV4|NDK_STAAC	98.3	91.38	23	3	3	Y	16575	Nucleoside diphosphate kinase OS=Staphylococcus aureus (strain COL) GN=ndk PE=1 SV=1
420	559	Q5HFD2|SYH_STAAC	98.8	91.35	10	3	3	Y	48283	Histidine--tRNA ligase OS=Staphylococcus aureus (strain COL) GN=hisS PE=3 SV=1
436	545	Q5HDG9|SARZ_STAAC	96.9	91.14	33	3	3	Y	17435	HTH-type transcriptional regulator SarZ OS=Staphylococcus aureus (strain COL) GN=sarZ PE=2 SV=1
654	1385	Q5HJ74|Q5HJ74_STAAC	82	90.99	25	3	1	Y	19864	Uncharacterized protein OS=Staphylococcus aureus (strain COL) GN=SACOL0289 PE=4 SV=1
540	423	O86491|MURE_STAAC	98.4	90.92	12	3	3	N	54105	UDP-N-acetylmuramoyl-L-alanyl-D-glutamate--L-lysine ligase OS=Staphylococcus aureus (strain COL) GN=murE PE=3 SV=2
713	584	Q5HF09|Q5HF09_STAAC	96.2	90.9	10	3	3	Y	38030	Proline dehydrogenase OS=Staphylococcus aureus (strain COL) GN=putA PE=4 SV=1
473	681	Q5HHB3|Q5HHB3_STAAC	94.8	90.35	15	4	4	Y	31669	Hydrolase haloacid dehalogenase-like family OS=Staphylococcus aureus (strain COL) GN=SACOL0976 PE=4 SV=1
186	946	Q5HEG6|HLD_STAAC	91.1	89.82	88	3	3	Y	2979	Delta-hemolysin OS=Staphylococcus aureus (strain COL) GN=hld PE=3 SV=3
620	547	Q5HJG8|AZOR_STAAC	96.8	89.61	17	2	2	N	23353	FMN-dependent NADH-azoreductase OS=Staphylococcus aureus (strain COL) GN=azoR PE=3 SV=1
373	457	Q5HGH9|HSLV_STAAC	98	88.99	20	3	3	Y	19572	ATP-dependent protease subunit HslV OS=Staphylococcus aureus (strain COL) GN=hslV PE=3 SV=1
566	535	Q5HET3|Q5HET3_STAAC	97	88.43	11	3	3	Y	35779	Cmp-binding-factor 1 OS=Staphylococcus aureus (strain COL) GN=cbf1 PE=4 SV=1
510	397	Q5HF22|Q5HF22_STAAC	98.6	88.34	25	3	3	N	15734	Uncharacterized protein OS=Staphylococcus aureus (strain COL) GN=SACOL1802 PE=4 SV=1
498	458	Q5HIA7|Q5HIA7_STAAC	98	88.01	22	3	3	N	13693	Uncharacterized protein OS=Staphylococcus aureus (strain COL) GN=SACOL0615 PE=4 SV=1
543	483	Q5HGT4|Q5HGT4_STAAC	97.6	87.96	19	4	4	Y	30583	Succinate dehydrogenase iron-sulfur protein OS=Staphylococcus aureus (strain COL) GN=sdhB PE=4 SV=1
501	512	Q5HDF9|Q5HDF9_STAAC	98.7	87.92	4	4	4	Y	139829	Respiratory nitrate reductase alpha subunit OS=Staphylococcus aureus (strain COL) GN=narG PE=3 SV=1
444	1831	Q5HG56|Y1399_STAAC	80.9	87.64	48	3	3	Y	6744	Probable tautomerase SACOL1399 OS=Staphylococcus aureus (strain COL) GN=SACOL1399 PE=3 SV=3
659	683	Q5HDI8|Q5HDI8_STAAC	97.4	87.35	5	2	2	Y	64537	Uncharacterized protein OS=Staphylococcus aureus (strain COL) GN=SACOL2364 PE=4 SV=1
518	1046	Q5HIS7|RS18_STAAC	89.1	87.33	31	3	3	Y	9310	30S ribosomal protein S18 OS=Staphylococcus aureus (strain COL) GN=rpsR PE=3 SV=1
302	542	Q5HF12|ROT_STAAC	96.9	87.19	14	2	2	N	19431	HTH-type transcriptional regulator rot OS=Staphylococcus aureus (strain COL) GN=rot PE=2 SV=1
513	447	Q5HJZ5|DNAA_STAAC	98.2	86.71	20	6	6	Y	51966	Chromosomal replication initiator protein DnaA OS=Staphylococcus aureus (strain COL) GN=dnaA PE=3 SV=1
632	564	Q5HF36|Q5HF36_STAAC	97.2	85.94	6	2	2	Y	55091	Uncharacterized protein OS=Staphylococcus aureus (strain COL) GN=SACOL1788 PE=4 SV=1
544	611	Q5HGP8|MURD_STAAC	95.7	85.8	5	2	2	N	49844	UDP-N-acetylmuramoylalanine--D-glutamate ligase OS=Staphylococcus aureus (strain COL) GN=murD PE=3 SV=1
353	317	Q5HCQ5|Q5HCQ5_STAAC	99	85.57	15	4	4	Y	35395	Mannose-6-phosphate isomerase class I OS=Staphylococcus aureus (strain COL) GN=manA2 PE=3 SV=1
450	1281	Q5HGV6|RL32_STAAC	84.4	85.44	51	2	2	Y	6485	50S ribosomal protein L32 OS=Staphylococcus aureus (strain COL) GN=rpmF PE=3 SV=1
379	747	Q5HHG9|Q5HHG9_STAAC	94.9	85.42	14	2	2	Y	17016	NifU domain protein OS=Staphylococcus aureus (strain COL) GN=SACOL0917 PE=4 SV=1
556	406	Q5HFP7|NUSB_STAAC	98.5	85.22	45	4	4	Y	15061	N utilization substance protein B homolog OS=Staphylococcus aureus (strain COL) GN=nusB PE=3 SV=1
432	795	Q5HGA4|Q5HGA4_STAAC	93.4	85.11	34	2	2	N	7500	Uncharacterized protein OS=Staphylococcus aureus (strain COL) GN=SACOL1350 PE=4 SV=1
410	855	Q5HGL1|Q5HGL1_STAAC	92	85.06	9	2	2	N	23572	Ribulose-phosphate 3-epimerase OS=Staphylococcus aureus (strain COL) GN=rpe PE=3 SV=1
419	729	Q5HF55|Q5HF55_STAAC	94.2	84.9	15	2	2	N	17111	GAF domain protein OS=Staphylococcus aureus (strain COL) GN=SACOL1768 PE=4 SV=1
579	537	Q5HE74|Q5HE74_STAAC	96.9	84.52	17	2	2	N	20164	Uncharacterized protein OS=Staphylococcus aureus (strain COL) GN=SACOL2118 PE=4 SV=1
504	394	Q5HJB8|Q5HJB8_STAAC	98.7	84.47	13	6	5	Y	66213	Glycosyl transferase group 2 family protein OS=Staphylococcus aureus (strain COL) GN=SACOL0243 PE=4 SV=1
645	573	Q5HGN1|PYRC_STAAC	96.3	84.45	10	3	3	Y	46372	Dihydroorotase OS=Staphylococcus aureus (strain COL) GN=pyrC PE=3 SV=1
533	568	Q5HII5|Q5HII5_STAAC	97.4	84.13	18	3	3	Y	29281	Deoxyribonuclease TatD family OS=Staphylococcus aureus (strain COL) GN=SACOL0534 PE=4 SV=1
412	369	Q5HG29|CVFB_STAAC	98.7	84.02	17	5	5	Y	34199	Conserved virulence factor B OS=Staphylococcus aureus (strain COL) GN=cvfB PE=3 SV=1
527	533	Q5HGQ0|Q5HGQ0_STAAC	97	82.75	5	3	3	Y	82709	Penicillin-binding protein 1 OS=Staphylococcus aureus (strain COL) GN=pbp1 PE=4 SV=1
742	658	Q5HFU6|KCY_STAAC	95.1	82.53	14	2	2	Y	24595	Cytidylate kinase OS=Staphylococcus aureus (strain COL) GN=cmk PE=3 SV=1
452	866	Q5HHQ3|Y830_STAAC	98.6	82.42	12	3	3	Y	34812	UPF0042 nucleotide-binding protein SACOL0830 OS=Staphylococcus aureus (strain COL) GN=SACOL0830 PE=3 SV=1
497	408	Q5HFJ7|PDRP_STAAC	98.5	81.9	27	4	4	Y	30784	Putative pyruvate phosphate dikinase regulatory protein OS=Staphylococcus aureus (strain COL) GN=SACOL1620 PE=3 SV=1
552	436	Q5HIE3|TRMHL_STAAC	98.7	81.82	29	4	4	Y	27207	Putative TrmH family tRNA/rRNA methyltransferase OS=Staphylococcus aureus (strain COL) GN=SACOL0578 PE=3 SV=1
643	502	Q5HGE0|Q5HGE0_STAAC	97.4	81.38	47	3	3	Y	11035	Uncharacterized protein OS=Staphylococcus aureus (strain COL) GN=SACOL1310 PE=4 SV=1
559	469	Q5HHP9|Y834_STAAC	97.8	81.24	11	3	3	N	34228	Epimerase family protein SACOL0834 OS=Staphylococcus aureus (strain COL) GN=SACOL0834 PE=3 SV=1
335	1283	Q5HG09|Q5HG09_STAAC	84.4	81.21	31	3	3	Y	7899	Uncharacterized protein OS=Staphylococcus aureus (strain COL) GN=SACOL1446 PE=4 SV=1
562	879	Q5HIL1|Q5HIL1_STAAC	92.2	80.88	36	2	2	Y	9999	Uncharacterized protein OS=Staphylococcus aureus (strain COL) GN=SACOL0508 PE=4 SV=1
584	429	Q5HD37|F16PC_STAAC	98.4	80.58	7	4	4	Y	76175	Fructose-1 6-bisphosphatase class 3 OS=Staphylococcus aureus (strain COL) GN=fbp PE=3 SV=1
576	921	Q5HEU6|Q5HEU6_STAAC	96.6	80.48	21	2	2	Y	21470	Uncharacterized protein OS=Staphylococcus aureus (strain COL) GN=SACOL1885 PE=4 SV=1
457	414	Q5HGD4|Q5HGD4_STAAC	98.4	80.28	23	3	3	N	20450	Glycerol uptake operon antiterminator regulatory protein OS=Staphylococcus aureus (strain COL) GN=glpP PE=4 SV=1
623	375	Q5HDL5|Q5HDL5_STAAC	98.7	79.94	13	3	3	Y	33722	ABC transporter ATP-binding protein OS=Staphylococcus aureus (strain COL) GN=SACOL2335 PE=3 SV=1
375	360	Q5HEB8|Q5HEB8_STAAC	98.8	79.58	7	3	3	N	50053	UDP-N-acetylmuramoyl-tripeptide--D-alanyl-D-alanine ligase OS=Staphylococcus aureus (strain COL) GN=murF PE=3 SV=1
600	509	Q5HEL7|PCRA_STAAC	98.3	79.41	7	3	3	Y	84074	ATP-dependent DNA helicase PcrA OS=Staphylococcus aureus (strain COL) GN=pcrA PE=3 SV=1
360	774	Q5HJF9|Q5HJF9_STAAC	93.7	78.89	11	2	2	N	21779	Uncharacterized protein OS=Staphylococcus aureus (strain COL) GN=SACOL0199 PE=4 SV=1
834	918	Q5HIH0|Q5HIH0_STAAC	91.6	78.83	8	3	3	Y	45110	Tetrapyrrole methylase family protein OS=Staphylococcus aureus (strain COL) GN=SACOL0549 PE=4 SV=1
591	487	Q5HCI3|MNME_STAAC	96.3	78.57	12	3	3	Y	51356	tRNA modification GTPase MnmE OS=Staphylococcus aureus (strain COL) GN=mnmE PE=3 SV=1
499	1185	Q5HHS1|Y812_STAAC	85.6	78.53	5	2	2	Y	32069	DegV domain-containing protein SACOL0812 OS=Staphylococcus aureus (strain COL) GN=SACOL0812 PE=4 SV=1
483	1059	Q5HFG6|Q5HFG6_STAAC	88.2	78.4	24	2	2	Y	11048	Uncharacterized protein OS=Staphylococcus aureus (strain COL) GN=SACOL1651 PE=4 SV=1
528	555	Q5HFD4|Q5HFD4_STAAC	96.6	78.25	12	2	2	Y	28641	HesA/MoeB/ThiF family protein OS=Staphylococcus aureus (strain COL) GN=SACOL1683 PE=4 SV=1
456	371	Q5HI00|SARX_STAAC	98.8	78.17	30	4	4	N	14179	HTH-type transcriptional regulator SarX OS=Staphylococcus aureus (strain COL) GN=sarX PE=3 SV=2
506	384	Q5HDM6|HUTU_STAAC	98.7	77.99	8	3	3	Y	60633	Urocanate hydratase OS=Staphylococcus aureus (strain COL) GN=hutU PE=3 SV=1
478	761	Q5HDG8|Q5HDG8_STAAC	93.3	77.59	13	2	2	N	16305	Heat shock protein Hsp20 family OS=Staphylococcus aureus (strain COL) GN=SACOL2385 PE=3 SV=1
532	1299	Q5HE46|PTMA_STAAC	83.8	77.41	23	2	2	N	15542	Mannitol-specific phosphotransferase enzyme IIA component OS=Staphylococcus aureus (strain COL) GN=mtlF PE=3 SV=3
590	553	Q5HIB3|SDRD_STAAC	96.7	77.31	2	2	1	N	149448	Serine-aspartate repeat-containing protein D OS=Staphylococcus aureus (strain COL) GN=sdrD PE=3 SV=1
605	777	Q5HEG8|Q5HEG8_STAAC	93.6	77.23	16	3	3	Y	24004	Uncharacterized protein OS=Staphylococcus aureus (strain COL) GN=SACOL2020 PE=4 SV=1
567	638	Q5HCW9|Y2597_STAAC	95.2	76.19	9	2	2	N	31006	Uncharacterized hydrolase SACOL2597 OS=Staphylococcus aureus (strain COL) GN=SACOL2597 PE=3 SV=1
691	620	Q5HI84|Q5HI84_STAAC	95.7	76.12	6	2	2	N	40217	Phosphomevalonate kinase OS=Staphylococcus aureus (strain COL) GN=SACOL0638 PE=4 SV=1
521	627	Q5HFQ8|Y1558_STAAC	98.1	76.09	30	3	3	Y	16221	UPF0403 protein SACOL1558 OS=Staphylococcus aureus (strain COL) GN=SACOL1558 PE=3 SV=1
541	594	Q5HGY5|POTA_STAAC	96	76.06	9	2	2	Y	41330	Spermidine/putrescine import ATP-binding protein PotA OS=Staphylococcus aureus (strain COL) GN=potA PE=3 SV=1
438	899	Q5HHY8|Q5HHY8_STAAC	92.7	75.93	13	2	2	Y	20889	Decarboxylase family protein OS=Staphylococcus aureus (strain COL) GN=SACOL0740 PE=4 SV=1
592	528	Q5HED1|ALR1_STAAC	97	75.7	6	2	2	Y	42823	Alanine racemase 1 OS=Staphylococcus aureus (strain COL) GN=alr1 PE=1 SV=1
602	768	Q5HE89|Q5HE89_STAAC	93.6	75.64	5	1	1	N	42413	UDP-N-acetylglucosamine 2-epimerase OS=Staphylococcus aureus (strain COL) GN=SACOL2103 PE=3 SV=1
413	1666	Q5HDH2|Q5HDH2_STAAC	77.5	75.42	8	3	3	Y	13340	Uncharacterized protein OS=Staphylococcus aureus (strain COL) GN=SACOL2381 PE=4 SV=1
585	505	Q5HFM2|GCST_STAAC	97.4	75.25	6	3	3	Y	40458	Aminomethyltransferase OS=Staphylococcus aureus (strain COL) GN=gcvT PE=3 SV=1
607	625	Q5HG16|ACYP_STAAC	93.8	75.2	42	2	2	N	10160	Acylphosphatase OS=Staphylococcus aureus (strain COL) GN=acyP PE=3 SV=1
361	950	Q5HE98|ATPE_STAAC	90.9	74.63	22	2	2	Y	14844	ATP synthase epsilon chain OS=Staphylococcus aureus (strain COL) GN=atpC PE=3 SV=1
622	579	Q5HDK6|Q5HDK6_STAAC	96.4	74.35	9	2	2	Y	34775	Esterase putative OS=Staphylococcus aureus (strain COL) GN=SACOL2345 PE=4 SV=1
614	480	Q5HJ48|LIP2_STAAC	97.7	74.34	7	3	3	Y	76388	Lipase 2 OS=Staphylococcus aureus (strain COL) GN=lip2 PE=3 SV=2
508	581	Q5HI17|Q5HI17_STAAC	96.3	74.31	15	3	3	Y	21261	DAK2 domain protein OS=Staphylococcus aureus (strain COL) GN=SACOL0708 PE=4 SV=1
745	647	Q5HHY1|Q5HHY1_STAAC	93.9	74.22	12	3	3	Y	35225	Cobalamin synthesis protein/P47K family protein OS=Staphylococcus aureus (strain COL) GN=SACOL0747 PE=4 SV=1
696	1125	Q5HF62|Q5HF62_STAAC	86	73.93	19	3	3	Y	35947	Uncharacterized protein OS=Staphylococcus aureus (strain COL) GN=SACOL1761 PE=4 SV=1
548	444	Q5HGN4|PYRR_STAAC	98.2	73.81	18	3	3	N	19855	Bifunctional protein PyrR OS=Staphylococcus aureus (strain COL) GN=pyrR PE=3 SV=1
564	561	Q5HCT4|Q5HCT4_STAAC	96.6	73.62	3	2	2	N	70480	Anaerobic ribonucleoside-triphosphate reductase OS=Staphylococcus aureus (strain COL) GN=nrdD PE=4 SV=1
661	1414	Q5HG91|Q5HG91_STAAC	58.7	73.46	9	2	2	Y	37869	Threonine synthase OS=Staphylococcus aureus (strain COL) GN=thrC PE=3 SV=1
545	652	Q5HGX9|MNTH_STAAC	95.1	73.19	4	1	1	N	49724	Divalent metal cation transporter MntH OS=Staphylococcus aureus (strain COL) GN=mntH PE=3 SV=1
595	606	Q5HJQ4|Q5HJQ4_STAAC	95.8	73.11	8	2	2	N	36744	Iron compound ABC transporter iron compound-binding protein SirA OS=Staphylococcus aureus (strain COL) GN=sirA PE=4 SV=1
405	929	Q5HDW9|RL24_STAAC	91.4	73.02	39	2	2	Y	11536	50S ribosomal protein L24 OS=Staphylococcus aureus (strain COL) GN=rplX PE=3 SV=1
836	1219	Q5HE51|Q5HE51_STAAC	81.9	72.52	9	3	3	Y	32760	Uncharacterized protein OS=Staphylococcus aureus (strain COL) GN=SACOL2143 PE=4 SV=1
535	577	Q5HF29|Q5HF29_STAAC	96.4	72.26	9	2	2	Y	39783	Glutamyl aminopeptidase OS=Staphylococcus aureus (strain COL) GN=pepA1 PE=4 SV=1
625	960	Q5HIL6|Q5HIL6_STAAC	90	72.13	5	2	2	Y	41279	Trans-sulfuration enzyme family protein OS=Staphylococcus aureus (strain COL) GN=SACOL0503 PE=3 SV=1
491	732	Q5HDM1|RPIA_STAAC	93.9	72.08	8	2	2	N	25541	Ribose-5-phosphate isomerase A OS=Staphylococcus aureus (strain COL) GN=rpiA PE=3 SV=1
624	596	Q5HGR2|ARCC1_STAAC	94.6	71.92	11	2	2	Y	33596	Carbamate kinase 1 OS=Staphylococcus aureus (strain COL) GN=arcC1 PE=3 SV=1
431	846	Q5HIS8|SSB1_STAAC	92.7	71.66	7	2	2	Y	18539	Single-stranded DNA-binding protein 1 OS=Staphylococcus aureus (strain COL) GN=ssb PE=3 SV=1
563	451	Q5HDQ0|Q5HDQ0_STAAC	98.1	71.64	32	3	3	Y	17478	Uncharacterized protein OS=Staphylococcus aureus (strain COL) GN=SACOL2300 PE=4 SV=1
640	3500	Q5HGT2|NTPA_STAAC	25.4	71.57	15	3	3	Y	21403	Non-canonical purine NTP pyrophosphatase OS=Staphylococcus aureus (strain COL) GN=SACOL1162 PE=3 SV=1
575	703	Q5HCV4|PANC_STAAC	93.6	70.98	7	2	2	N	31462	Pantothenate synthetase OS=Staphylococcus aureus (strain COL) GN=panC PE=3 SV=1
679	632	Q5HEI9|Q5HEI9_STAAC	95.1	70.82	8	2	2	N	32952	ABC transporter ATP-binding protein OS=Staphylococcus aureus (strain COL) GN=SACOL1994 PE=4 SV=1
615	640	Q5HDA3|Q5HDA3_STAAC	95.3	70.78	10	2	2	N	23800	Uncharacterized protein OS=Staphylococcus aureus (strain COL) GN=SACOL2456 PE=4 SV=1
560	395	Q5HG01|CTPAL_STAAC	98.6	70.55	11	5	5	Y	55277	Probable CtpA-like serine protease OS=Staphylococcus aureus (strain COL) GN=SACOL1455 PE=3 SV=1
480	417	Q5HF47|Q5HF47_STAAC	98.4	70.32	14	3	3	N	23074	1-acyl-sn-glycerol-3-phosphate acyltransferase putative OS=Staphylococcus aureus (strain COL) GN=SACOL1776 PE=4 SV=1
682	661	Q5HCK9|DRP35_STAAC	94.7	70	14	2	2	N	35964	Lactonase drp35 OS=Staphylococcus aureus (strain COL) GN=drp35 PE=3 SV=2
568	657	Q5HI54|Q5HI54_STAAC	95.1	69.83	18	2	2	N	18594	Uncharacterized protein OS=Staphylococcus aureus (strain COL) GN=SACOL0669 PE=4 SV=1
570	595	Q5HDR5|UREG_STAAC	96	69.69	7	1	1	N	22345	Urease accessory protein UreG OS=Staphylococcus aureus (strain COL) GN=ureG PE=3 SV=1
674	624	Q5HH04|Q5HH04_STAAC	98.5	69.09	11	3	3	Y	44768	Uncharacterized protein OS=Staphylococcus aureus (strain COL) GN=SACOL1089 PE=3 SV=1
596	664	Q5HFS9|Q5HFS9_STAAC	95.1	69.02	15	2	2	Y	27969	Pseudouridine synthase OS=Staphylococcus aureus (strain COL) GN=rluB PE=3 SV=1
709	418	Q5HD05|Q5HD05_STAAC	94.7	68.8	4	2	2	N	46237	Hydroxymethylglutaryl-CoA reductase degradative OS=Staphylococcus aureus (strain COL) GN=SACOL2560 PE=3 SV=1
507	893	Q5HGI6|SUCD_STAAC	92	68.48	10	2	2	Y	31542	Succinyl-CoA ligase [ADP-forming] subunit alpha OS=Staphylococcus aureus (strain COL) GN=sucD PE=3 SV=1
635	714	Q5HGF3|Q5HGF3_STAAC	94.3	68.35	6	2	2	Y	48618	Uncharacterized protein OS=Staphylococcus aureus (strain COL) GN=SACOL1297 PE=3 SV=1
741	1294	Q5HDD6|HLGA_STAAC	83.9	68.31	5	2	2	Y	34956	Gamma-hemolysin component A OS=Staphylococcus aureus (strain COL) GN=hlgA PE=3 SV=1
426	726	Q5HHQ2|Q5HHQ2_STAAC	94.2	68.3	6	1	1	N	36260	Gluconeogenesis factor OS=Staphylococcus aureus (strain COL) GN=SACOL0831 PE=3 SV=1
425	796	Q5HFJ0|YBEY_STAAC	93.4	68.06	15	2	2	Y	17952	Endoribonuclease YbeY OS=Staphylococcus aureus (strain COL) GN=ybeY PE=3 SV=1
708	603	Q5HIB1|Q5HIB1_STAAC	95.9	67.91	3	1	1	N	57193	Glycosyl transferase group 1 family protein OS=Staphylococcus aureus (strain COL) GN=SACOL0611 PE=4 SV=1
694	904	Q5HG89|Q5HG89_STAAC	91.9	67.66	14	3	3	Y	29822	Hydrolase haloacid dehalogenase-like family OS=Staphylococcus aureus (strain COL) GN=SACOL1365 PE=4 SV=1
835	1228	Q5HD92|Q5HD92_STAAC	84.5	67.57	8	1	1	N	17311	Lipoprotein putative OS=Staphylococcus aureus (strain COL) GN=SACOL2467 PE=4 SV=1
827	2411	Q5HCY1|ISAA_STAAC	55.2	67.11	19	3	3	Y	24203	Probable transglycosylase IsaA OS=Staphylococcus aureus (strain COL) GN=isaA PE=1 SV=1
547	1124	Q5HI16|Q5HI16_STAAC	87.7	67.03	12	1	1	N	12785	Uncharacterized protein OS=Staphylococcus aureus (strain COL) GN=SACOL0709 PE=4 SV=1
582	682	Q5HFL4|Q5HFL4_STAAC	94.7	67	17	1	1	N	12282	Uncharacterized protein OS=Staphylococcus aureus (strain COL) GN=SACOL1603 PE=4 SV=1
593	600	Q5HFW8|DING_STAAC	95.9	66.98	1	1	1	N	104218	Probable ATP-dependent helicase DinG homolog OS=Staphylococcus aureus (strain COL) GN=dinG PE=3 SV=1
617	689	Q5HGL6|FMT_STAAC	94.7	66.39	8	2	2	N	34211	Methionyl-tRNA formyltransferase OS=Staphylococcus aureus (strain COL) GN=fmt PE=3 SV=1
574	695	Q5HFF0|Q5HFF0_STAAC	95.9	66.38	5	2	2	Y	47645	Peptidase U32 family OS=Staphylococcus aureus (strain COL) GN=SACOL1667 PE=4 SV=1
442	987	Q5HFZ3|Q5HFZ3_STAAC	90.2	66.3	17	1	1	Y	9407	Conserved domain protein OS=Staphylococcus aureus (strain COL) GN=SACOL1466 PE=4 SV=1
525	626	Q5HGT0|Q5HGT0_STAAC	95.5	66.2	18	2	2	N	12597	Fibrinogen binding-related protein OS=Staphylococcus aureus (strain COL) GN=SACOL1164 PE=4 SV=1
714	635	Q5HJY2|Q5HJY2_STAAC	95.4	65.9	5	2	2	N	73781	DHH subfamily 1 protein OS=Staphylococcus aureus (strain COL) GN=SACOL0014 PE=4 SV=1
578	1756	Q5HHN9|SECG_STAAC	72.2	65.47	23	1	1	Y	8399	Probable protein-export membrane protein SecG OS=Staphylococcus aureus (strain COL) GN=secG PE=3 SV=1
546	779	Q5HEP2|Q5HEP2_STAAC	96.6	65.36	18	2	2	Y	10322	Uncharacterized protein OS=Staphylococcus aureus (strain COL) GN=SACOL1940 PE=4 SV=1
469	712	Q5HE77|Q5HE77_STAAC	84.5	65.31	21	1	1	N	12686	Uncharacterized protein OS=Staphylococcus aureus (strain COL) GN=SACOL2115 PE=4 SV=1
842	1263	Q5HEL5|Q5HEL5_STAAC	84.8	65.14	15	1	1	N	11519	Uncharacterized protein OS=Staphylococcus aureus (strain COL) GN=SACOL1968 PE=4 SV=1
537	639	Q5HD77|Q5HD77_STAAC	91.3	65.1	11	1	1	N	16484	Alkylhydroperoxidase AhpD family OS=Staphylococcus aureus (strain COL) GN=SACOL2484 PE=3 SV=1
401	1766	Q5HEP8|Q5HEP8_STAAC	71.9	65.06	32	1	1	N	6305	Uncharacterized protein OS=Staphylococcus aureus (strain COL) GN=SACOL1934 PE=4 SV=1
601	696	Q5HGU6|SYFA_STAAC	94.5	64.89	6	1	1	Y	40107	Phenylalanine--tRNA ligase alpha subunit OS=Staphylococcus aureus (strain COL) GN=pheS PE=3 SV=1
724	860	Q5HFR8|RNZ_STAAC	92.3	64.68	5	1	1	N	34585	Ribonuclease Z OS=Staphylococcus aureus (strain COL) GN=rnz PE=3 SV=1
572	583	Q5HFL5|Q5HFL5_STAAC	96.3	64.55	21	2	2	Y	23141	Metallo-beta-lactamase family protein OS=Staphylococcus aureus (strain COL) GN=SACOL1602 PE=4 SV=1
505	622	Q5HED4|Q5HED4_STAAC	95.6	64.49	7	2	2	N	38426	Sigma factor B regulator protein OS=Staphylococcus aureus (strain COL) GN=rsbU PE=4 SV=1
890	651	Q5HD73|Y2488_STAAC	95.2	64.35	16	3	3	Y	24604	Uncharacterized oxidoreductase SACOL2488 OS=Staphylococcus aureus (strain COL) GN=SACOL2488 PE=3 SV=1
577	1284	Q5HET9|Q5HET9_STAAC	84	64.34	3	1	1	N	48442	Membrane protein putative OS=Staphylococcus aureus (strain COL) GN=SACOL1892 PE=4 SV=1
763	1169	Q5HFM5|Q5HFM5_STAAC	86.9	63.69	12	1	1	Y	14803	Rhodanese-like domain protein OS=Staphylococcus aureus (strain COL) GN=SACOL1592 PE=4 SV=1
676	538	Q5HF58|Q5HF58_STAAC	96.9	63.33	10	2	2	N	41992	Aminotransferase class V OS=Staphylococcus aureus (strain COL) GN=SACOL1765 PE=3 SV=1
658	996	Q5HFG3|Q5HFG3_STAAC	90.1	63.1	9	1	1	N	20219	Hydrolase HAD-superfamily subfamily IIIA OS=Staphylococcus aureus (strain COL) GN=SACOL1654 PE=4 SV=1
511	2161	Q5HG00|Y1456_STAAC	61.7	63.03	18	1	1	N	8870	UPF0346 protein SACOL1456 OS=Staphylococcus aureus (strain COL) GN=SACOL1456 PE=3 SV=1
760	988	Q5HIQ9|XPT_STAAC	93.5	62.85	12	2	2	Y	20884	Xanthine phosphoribosyltransferase OS=Staphylococcus aureus (strain COL) GN=xpt PE=3 SV=1
660	1047	Q5HGM3|KGUA_STAAC	89.7	62.7	13	2	2	Y	24037	Guanylate kinase OS=Staphylococcus aureus (strain COL) GN=gmk PE=1 SV=1
565	675	Q5HGC5|Q5HGC5_STAAC	94.8	62.62	3	1	1	N	45488	Uncharacterized protein OS=Staphylococcus aureus (strain COL) GN=SACOL1327 PE=4 SV=1
430	813	Q5HGF9|Q5HGF9_STAAC	93.1	62.56	4	1	1	N	36692	Riboflavin biosynthesis protein RibF OS=Staphylococcus aureus (strain COL) GN=ribF PE=4 SV=1
638	786	Q5HDH0|Q5HDH0_STAAC	93.5	62.25	17	2	2	N	14007	Uncharacterized protein OS=Staphylococcus aureus (strain COL) GN=SACOL2383 PE=4 SV=1
680	780	Q5HDE7|Q5HDE7_STAAC	93.6	61.76	7	1	1	N	23062	Lipoprotein putative OS=Staphylococcus aureus (strain COL) GN=SACOL2407 PE=4 SV=1
286	1975	Q5HDW7|RS17_STAAC	67	61.7	16	2	2	Y	10175	30S ribosomal protein S17 OS=Staphylococcus aureus (strain COL) GN=rpsQ PE=3 SV=1
783	759	Q5HJE2|Q5HJE2_STAAC	93.8	61.58	7	2	2	N	42183	Uncharacterized protein OS=Staphylococcus aureus (strain COL) GN=SACOL0216 PE=4 SV=1
1146	942	Q5HG92|Q5HG92_STAAC	89.5	61.25	3	1	1	N	46874	Homoserine dehydrogenase OS=Staphylococcus aureus (strain COL) GN=hom PE=3 SV=1
784	853	Q5HIB7|Q5HIB7_STAAC	92.6	61.22	10	2	2	N	24153	Deoxynucleoside kinase family protein OS=Staphylococcus aureus (strain COL) GN=SACOL0604 PE=4 SV=1
777	464	Q5HEJ9|Q5HEJ9_STAAC	97.9	60.92	10	3	3	N	51741	Aldehyde dehydrogenase OS=Staphylococcus aureus (strain COL) GN=aldA2 PE=3 SV=1
639	843	Q5HD30|Y2534_STAAC	92.7	60.86	5	1	1	N	25389	Putative NAD(P)H nitroreductase SACOL2534 OS=Staphylococcus aureus (strain COL) GN=SACOL2534 PE=3 SV=1
616	886	Q5HGI9|Q5HGI9_STAAC	92	60.62	9	2	2	Y	33381	Ribosome biogenesis GTPase A OS=Staphylococcus aureus (strain COL) GN=SACOL1260 PE=3 SV=1
723	1344	Q5HFC5|Q5HFC5_STAAC	82.8	60.55	22	2	2	N	9671	Preprotein translocase YajC subunit OS=Staphylococcus aureus (strain COL) GN=yajC PE=4 SV=1
553	824	Q5HJZ3|Q5HJZ3_STAAC	93.2	60.39	41	2	2	N	9137	Uncharacterized protein OS=Staphylococcus aureus (strain COL) GN=SACOL0003 PE=4 SV=1
666	2162	Q5HFT9|Q5HFT9_STAAC	61.7	60.19	17	1	1	N	8841	Ferredoxin OS=Staphylococcus aureus (strain COL) GN=fer PE=4 SV=1
657	753	Q5HFC7|Q5HFC7_STAAC	93.8	59.97	3	2	2	Y	85611	Single-stranded-DNA-specific exonuclease RecJ OS=Staphylococcus aureus (strain COL) GN=recJ PE=4 SV=1
662	660	Q5HI55|Q5HI55_STAAC	94.4	59.71	18	3	3	Y	30925	Hydrolase alpha/beta hydrolase fold family OS=Staphylococcus aureus (strain COL) GN=SACOL0668 PE=4 SV=1
746	543	Q5HCI4|MNMG_STAAC	96.8	59.7	3	2	2	Y	70116	tRNA uridine 5-carboxymethylaminomethyl modification enzyme MnmG OS=Staphylococcus aureus (strain COL) GN=mnmG PE=3 SV=1
692	873	Q5HG97|Q5HG97_STAAC	86.6	59.65	12	2	2	Y	20328	Thermonuclease family protein OS=Staphylococcus aureus (strain COL) GN=SACOL1357 PE=4 SV=1
830	912	Q5HGU1|Q5HGU1_STAAC	91.4	59.61	3	1	1	N	64870	DNA-dependent DNA polymerase family X OS=Staphylococcus aureus (strain COL) GN=SACOL1153 PE=4 SV=1
710	462	Q5HDV8|RL3_STAAC	97.9	59.49	30	3	3	Y	22563	50S ribosomal protein L3 OS=Staphylococcus aureus (strain COL) GN=rplC PE=3 SV=1
711	643	Q5HEF2|TSAD_STAAC	95.3	58.97	7	2	2	N	36819	tRNA N6-adenosine threonylcarbamoyltransferase OS=Staphylococcus aureus (strain COL) GN=tsaD PE=3 SV=1
778	582	Q5HFP8|EX7L_STAAC	96.3	58.92	11	3	3	Y	50894	Exodeoxyribonuclease 7 large subunit OS=Staphylococcus aureus (strain COL) GN=xseA PE=3 SV=1
695	1349	Q5HIJ4|Q5HIJ4_STAAC	82.7	58.38	27	2	2	Y	11838	Uncharacterized protein OS=Staphylococcus aureus (strain COL) GN=SACOL0525 PE=4 SV=1
690	641	Q5HFG8|Q5HFG8_STAAC	95.2	58.25	6	1	1	Y	22464	Uncharacterized protein OS=Staphylococcus aureus (strain COL) GN=SACOL1649 PE=4 SV=1
1143	851	Q5HJC2|Q5HJC2_STAAC	92.6	58.24	5	1	1	N	45961	TagF domain protein OS=Staphylococcus aureus (strain COL) GN=SACOL0239 PE=4 SV=1
648	1142	Q5HHF1|Q5HHF1_STAAC	87.4	58.08	4	1	1	N	47775	DltB protein OS=Staphylococcus aureus (strain COL) GN=dltB PE=4 SV=1
606	949	Q5HGP3|Q5HGP3_STAAC	90.2	57.86	15	2	2	Y	25602	Uncharacterized protein OS=Staphylococcus aureus (strain COL) GN=SACOL1201 PE=3 SV=1
594	586	Q5HIE8|Q5HIE8_STAAC	96.2	57.85	5	2	2	Y	39587	PIN/TRAM domain protein OS=Staphylococcus aureus (strain COL) GN=SACOL0573 PE=4 SV=1
603	629	Q5HF89|Q5HF89_STAAC	95.2	57.83	9	2	2	Y	35636	Primosomal protein DnaI OS=Staphylococcus aureus (strain COL) GN=dnaI PE=4 SV=1
524	653	Q5HDJ0|MQO1_STAAC	95.2	57.36	3	1	1	N	54814	Probable malate:quinone oxidoreductase 1 OS=Staphylococcus aureus (strain COL) GN=mqo1 PE=3 SV=1
719	863	Q5HGF4|Q5HGF4_STAAC	92.5	57.07	7	1	1	N	26951	Transcriptional regulator GntR family putative OS=Staphylococcus aureus (strain COL) GN=SACOL1296 PE=4 SV=1
634	840	Q5HFC2|RUVB_STAAC	92.8	57	4	1	1	N	37718	Holliday junction ATP-dependent DNA helicase RuvB OS=Staphylococcus aureus (strain COL) GN=ruvB PE=3 SV=1
644	1342	Q5HDF7|Q5HDF7_STAAC	82.8	56.83	12	1	1	N	11437	Nitrite reductase [NAD(P)H] small subunit OS=Staphylococcus aureus (strain COL) GN=nirD PE=4 SV=1
526	1748	Q5HGS2|Q5HGS2_STAAC	72.3	56.6	18	1	1	N	8899	Uncharacterized protein OS=Staphylococcus aureus (strain COL) GN=SACOL1172 PE=4 SV=1
743	698	Q5HFQ3|Q5HFQ3_STAAC	94.4	56.15	8	3	3	N	51112	Dihydrolipoyl dehydrogenase OS=Staphylococcus aureus (strain COL) GN=lpdA PE=3 SV=1
738	517	Q5HIL3|Q5HIL3_STAAC	97.2	55.87	13	3	3	Y	30456	Lipoprotein OS=Staphylococcus aureus (strain COL) GN=SACOL0506 PE=3 SV=1
586	1310	Q5HFE6|RUVX_STAAC	83.7	55.69	15	2	2	Y	15865	Putative Holliday junction resolvase OS=Staphylococcus aureus (strain COL) GN=SACOL1671 PE=3 SV=1
712	441	Q5HDF1|Q5HDF1_STAAC	98	55.38	7	3	3	Y	59187	ABC transporter substrate-binding protein OS=Staphylococcus aureus (strain COL) GN=SACOL2403 PE=3 SV=1
752	856	Q5HIW6|Q5HIW6_STAAC	92.6	55.23	4	1	1	N	37748	Oxidoreductase putative OS=Staphylococcus aureus (strain COL) GN=SACOL0399 PE=4 SV=1
531	718	Q5HEI3|Q5HEI3_STAAC	94.3	54.93	2	1	1	N	48147	Aminotransferase putative OS=Staphylococcus aureus (strain COL) GN=SACOL2000 PE=4 SV=1
726	1764	Q5HI27|Q5HI27_STAAC	72	54.92	14	1	1	N	15817	Glycerol-3-phosphate cytidylyltransferase OS=Staphylococcus aureus (strain COL) GN=tagD PE=4 SV=1
718	1535	Q5HDK7|Q5HDK7_STAAC	77.7	54.56	27	2	2	Y	16306	Uncharacterized protein OS=Staphylococcus aureus (strain COL) GN=SACOL2344 PE=4 SV=1
693	811	Q5HDP2|Q5HDP2_STAAC	93.2	54.43	6	1	1	N	33005	Phosphosugar-binding transcriptional regulator RpiR family OS=Staphylococcus aureus (strain COL) GN=SACOL2308 PE=4 SV=1
938	2181	Q5HI64|Q5HI64_STAAC	61.4	54.17	13	2	2	Y	19579	Uncharacterized protein OS=Staphylococcus aureus (strain COL) GN=SACOL0659 PE=4 SV=1
791	1412	Q5HHC4|ASSY_STAAC	80.1	53.99	4	1	1	N	44456	Argininosuccinate synthase OS=Staphylococcus aureus (strain COL) GN=argG PE=3 SV=1
503	878	Q5HHX1|Q5HHX1_STAAC	92.2	53.96	4	1	1	N	28499	Transcriptional regulator DeoR family OS=Staphylococcus aureus (strain COL) GN=SACOL0757 PE=4 SV=1
636	1384	Q5HIS0|Q5HIS0_STAAC	82	53.84	11	1	1	N	22733	Phosphoglycerate mutase family protein OS=Staphylococcus aureus (strain COL) GN=SACOL0447 PE=4 SV=1
782	938	Q5HJB5|LYTR_STAAC	91	53.39	9	1	1	N	28221	Sensory transduction protein LytR OS=Staphylococcus aureus (strain COL) GN=lytR PE=3 SV=1
555	757	Q5HDF3|Q5HDF3_STAAC	93.6	53.07	4	1	1	N	30670	Formate/nitrite transporter family protein OS=Staphylococcus aureus (strain COL) GN=SACOL2401 PE=4 SV=1
583	758	Q5HCI6|Q5HCI6_STAAC	93.8	52.92	5	1	1	N	32197	Chromosome partioning protein ParB family OS=Staphylococcus aureus (strain COL) GN=SACOL2735 PE=4 SV=1
725	1110	Q5HFV8|AROB_STAAC	87.9	52.78	5	1	1	N	40316	3-dehydroquinate synthase OS=Staphylococcus aureus (strain COL) GN=aroB PE=3 SV=1
558	1280	Q5HFC8|APT_STAAC	84.4	52.54	8	1	1	N	19117	Adenine phosphoribosyltransferase OS=Staphylococcus aureus (strain COL) GN=apt PE=3 SV=1
761	1067	Q5HH57|Q5HH57_STAAC	88.7	52.4	29	2	2	Y	6677	Conserved domain protein OS=Staphylococcus aureus (strain COL) GN=SACOL1035 PE=4 SV=1
717	1016	Q5HG23|DAPH_STAAC	89.4	52.35	7	1	1	N	25258	2 3 4 5-tetrahydropyridine-2 6-dicarboxylate N-acetyltransferase OS=Staphylococcus aureus (strain COL) GN=dapH PE=3 SV=1
892	857	Q5HIH2|MFD_STAAC	91.2	52.29	2	3	3	Y	134229	Transcription-repair-coupling factor OS=Staphylococcus aureus (strain COL) GN=mfd PE=3 SV=1
642	2165	Q5HHE7|Q5HHE7_STAAC	61.7	52.07	10	1	1	N	12602	Uncharacterized protein OS=Staphylococcus aureus (strain COL) GN=SACOL0940 PE=4 SV=1
683	1041	Q5HGQ2|RSMH_STAAC	88.8	51.97	5	1	1	N	35710	Ribosomal RNA small subunit methyltransferase H OS=Staphylococcus aureus (strain COL) GN=rsmH PE=3 SV=1
610	1378	Q5HF31|Y1793_STAAC	80.8	51.85	4	1	1	N	33071	UPF0354 protein SACOL1793 OS=Staphylococcus aureus (strain COL) GN=SACOL1793 PE=3 SV=1
727	2166	Q5HCZ8|Q5HCZ8_STAAC	61.7	51.76	9	1	1	N	19525	Uncharacterized protein OS=Staphylococcus aureus (strain COL) GN=SACOL2567 PE=4 SV=1
626	648	Q5HHV6|Q5HHV6_STAAC	93.8	51.66	4	1	1	N	27123	Uncharacterized protein OS=Staphylococcus aureus (strain COL) GN=SACOL0776 PE=4 SV=1
299	2167	Q5HCJ0|Q5HCJ0_STAAC	61.7	51.59	15	1	1	Y	7258	Cold shock protein CSD family OS=Staphylococcus aureus (strain COL) GN=SACOL2731 PE=3 SV=1
538	1129	Q5HGP1|Q5HGP1_STAAC	71.7	51.46	10	1	1	N	11252	YlmG protein OS=Staphylococcus aureus (strain COL) GN=ylmG PE=4 SV=1
721	951	Q5HGG3|Q5HGG3_STAAC	90.9	51.39	13	1	1	N	11538	30S ribosomal protein L7 Ae OS=Staphylococcus aureus (strain COL) GN=SACOL1287 PE=4 SV=1
744	748	Q5HE71|Q5HE71_STAAC	94	51.25	3	1	1	Y	33110	Acetyltransferase GNAT family OS=Staphylococcus aureus (strain COL) GN=SACOL2121 PE=4 SV=1
652	948	Q5HE56|Q5HE56_STAAC	90.1	51.23	7	1	1	N	24032	Uncharacterized protein OS=Staphylococcus aureus (strain COL) GN=SACOL2136 PE=4 SV=1
699	981	Q5HIG1|DHPS_STAAC	89.8	51.03	6	1	1	N	29552	Dihydropteroate synthase OS=Staphylococcus aureus (strain COL) GN=folP PE=3 SV=1
837	932	Q5HCT0|Q5HCT0_STAAC	90.2	50.85	2	1	1	N	72273	Sulfite reductase (NADPH) flavoprotein alpha-component OS=Staphylococcus aureus (strain COL) GN=cysJ PE=3 SV=1
609	787	Q5HGG0|TRUB_STAAC	91.8	50.82	3	1	1	N	34593	tRNA pseudouridine synthase B OS=Staphylococcus aureus (strain COL) GN=truB PE=3 SV=1
720	628	Q5HHP6|Q5HHP6_STAAC	95.5	50.78	7	2	2	N	37211	Gap transcriptional regulator OS=Staphylococcus aureus (strain COL) GN=gapR PE=4 SV=1
675	692	Q5HFK8|Q5HFK8_STAAC	94.7	50.77	3	2	2	N	77238	Penicillin-binding protein 3 OS=Staphylococcus aureus (strain COL) GN=pbp3 PE=4 SV=1
1002	598	Q5HG72|SBCC_STAAC	95	50.36	1	1	1	N	117317	Nuclease SbcCD subunit C OS=Staphylococcus aureus (strain COL) GN=sbcC PE=3 SV=1
604	1167	Q5HFE9|Q5HFE9_STAAC	84.1	50.22	4	1	1	N	35959	Peptidase U32 family OS=Staphylococcus aureus (strain COL) GN=SACOL1668 PE=4 SV=1
630	1303	Q5HHE1|Q5HHE1_STAAC	61.7	50.15	8	1	1	N	13545	ComA2 family protein OS=Staphylococcus aureus (strain COL) GN=SACOL0947 PE=4 SV=1
653	3133	Q5HIS3|Q5HIS3_STAAC	34.9	50.1	6	1	1	Y	21306	Uncharacterized protein OS=Staphylococcus aureus (strain COL) GN=SACOL0444 PE=4 SV=1
785	760	Q5HGD9|MIAB_STAAC	93.6	49.8	2	1	1	N	58931	(Dimethylallyl)adenosine tRNA methylthiotransferase MiaB OS=Staphylococcus aureus (strain COL) GN=miaB PE=3 SV=1
832	834	Q5HFW0|Q5HFW0_STAAC	90.5	49.67	11	2	2	Y	48423	TPR domain protein OS=Staphylococcus aureus (strain COL) GN=SACOL1503 PE=4 SV=1
759	890	Q5HIF3|Q5HIF3_STAAC	92.1	49.48	4	1	1	Y	43805	Nucleoside permease NupC OS=Staphylococcus aureus (strain COL) GN=nupC PE=4 SV=1
755	473	Q5HHW0|Q5HHW0_STAAC	97.6	49.38	16	3	3	Y	26821	7-carboxy-7-deazaguanine synthase OS=Staphylococcus aureus (strain COL) GN=queE PE=3 SV=1
756	831	Q5HFP5|Q5HFP5_STAAC	92.7	49.27	6	2	2	Y	50049	Acetyl-CoA carboxylase biotin carboxylase OS=Staphylococcus aureus (strain COL) GN=accC PE=4 SV=1
621	1209	Q5HIG0|FOLB_STAAC	84.5	49.01	16	1	1	N	13735	Dihydroneopterin aldolase OS=Staphylococcus aureus (strain COL) GN=folB PE=3 SV=1
747	716	Q5HGW3|Q5HGW3_STAAC	94.3	48.95	3	1	1	N	34734	Glycerophosphoryl diester phosphodiesterase putative OS=Staphylococcus aureus (strain COL) GN=SACOL1130 PE=4 SV=1
866	552	Q5HF18|Q5HF18_STAAC	96.6	48.71	1	3	3	Y	238269	Cell wall surface anchor family protein OS=Staphylococcus aureus (strain COL) GN=sasC PE=3 SV=1
665	1495	Q5HG78|Y1376_STAAC	78.9	48.67	13	1	1	N	9203	UPF0291 protein SACOL1376 OS=Staphylococcus aureus (strain COL) GN=SACOL1376 PE=3 SV=1
758	762	Q5HG04|ARLR_STAAC	93.3	48.62	16	2	2	N	25498	Response regulator ArlR OS=Staphylococcus aureus (strain COL) GN=arlR PE=3 SV=1
788	814	Q5HFT7|Q5HFT7_STAAC	93.2	48.54	3	1	1	N	34586	Lipoprotein putative OS=Staphylococcus aureus (strain COL) GN=SACOL1528 PE=4 SV=1
739	499	Q5HGM9|CARB_STAAC	97.4	48.36	6	3	3	Y	117185	Carbamoyl-phosphate synthase large chain OS=Staphylococcus aureus (strain COL) GN=carB PE=3 SV=1
774	536	Q5HF33|Q5HF33_STAAC	96.9	48.18	4	4	4	Y	144656	FtsK/SpoIIIE family protein OS=Staphylococcus aureus (strain COL) GN=SACOL1791 PE=4 SV=1
899	961	Q5HIM0|Q5HIM0_STAAC	90.8	47.49	13	3	3	Y	27443	Uncharacterized protein OS=Staphylococcus aureus (strain COL) GN=SACOL0499 PE=4 SV=1
663	498	Q5HHR5|RF2_STAAC	97.3	47.41	11	3	3	Y	42331	Peptide chain release factor 2 OS=Staphylococcus aureus (strain COL) GN=prfB PE=3 SV=1
641	1369	Q5HJI0|PTXBC_STAAC	82.4	47.02	2	1	1	Y	50665	PTS system EIIBC component SACOL0178 OS=Staphylococcus aureus (strain COL) GN=SACOL0178 PE=3 SV=1
934	1094	Q5HF99|ENGB_STAAC	87.4	46.92	9	2	2	Y	22685	Probable GTP-binding protein EngB OS=Staphylococcus aureus (strain COL) GN=engB PE=3 SV=1
655	1170	Q5HEG2|AGRA_STAAC	85.7	46.85	4	1	1	N	27906	Accessory gene regulator A OS=Staphylococcus aureus (strain COL) GN=agrA PE=3 SV=1
550	727	Q5HDJ9|TCAA_STAAC	94.1	46.72	2	1	1	N	52148	Membrane-associated protein TcaA OS=Staphylococcus aureus (strain COL) GN=tcaA PE=1 SV=1
823	614	Q5HG57|MSRR_STAAC	95.7	46.62	6	1	1	N	36971	Regulatory protein MsrR OS=Staphylococcus aureus (strain COL) GN=msrR PE=3 SV=1
792	1839	Q5HIK1|Q5HIK1_STAAC	70	46.23	9	1	1	N	27963	Trehalose operon repressor OS=Staphylococcus aureus (strain COL) GN=treR PE=4 SV=1
689	809	Q5HJX8|PURA_STAAC	93.3	46	4	2	2	Y	47579	Adenylosuccinate synthetase OS=Staphylococcus aureus (strain COL) GN=purA PE=3 SV=1
697	1115	Q5HI86|Q5HI86_STAAC	87.9	45.62	5	1	1	N	32919	Mevalonate kinase OS=Staphylococcus aureus (strain COL) GN=mvk PE=3 SV=1
1140	599	Q5HIY2|Q5HIY2_STAAC	95.9	45.35	3	2	2	Y	73136	Uncharacterized protein OS=Staphylococcus aureus (strain COL) GN=SACOL0383 PE=4 SV=1
627	1030	Q5HF87|NRDR_STAAC	61.6	45.31	12	1	1	N	18204	Transcriptional repressor NrdR OS=Staphylococcus aureus (strain COL) GN=nrdR PE=3 SV=1
1142	816	Q5HIT8|METE_STAAC	93.1	45.17	2	1	1	N	85076	5-methyltetrahydropteroyltriglutamate--homocysteine methyltransferase OS=Staphylococcus aureus (strain COL) GN=metE PE=3 SV=1
913	1113	Q5HFP6|Q5HFP6_STAAC	79.6	44.88	30	3	3	Y	13273	Uncharacterized protein OS=Staphylococcus aureus (strain COL) GN=SACOL1570 PE=4 SV=1
716	785	Q5HD09|Q5HD09_STAAC	93.4	44.72	5	1	1	N	33684	Transcriptional regulator LysR family putative OS=Staphylococcus aureus (strain COL) GN=SACOL2555 PE=4 SV=1
839	1063	Q5HII8|Q5HII8_STAAC	84.8	44.65	4	1	1	Y	31275	Ribosomal RNA small subunit methyltransferase I OS=Staphylococcus aureus (strain COL) GN=rsmI PE=3 SV=1
940	1091	Q5HIH6|GLMU_STAAC	81.5	44.46	4	1	1	Y	48533	Bifunctional protein GlmU OS=Staphylococcus aureus (strain COL) GN=glmU PE=3 SV=1
700	1858	Q5HF28|Q5HF28_STAAC	69.7	44.41	11	1	1	N	11967	Uncharacterized protein OS=Staphylococcus aureus (strain COL) GN=SACOL1796 PE=4 SV=1
677	828	Q5HFX9|Q5HFX9_STAAC	93	44.03	4	1	1	N	43333	Uncharacterized protein OS=Staphylococcus aureus (strain COL) GN=SACOL1483 PE=4 SV=1
722	1123	Q5HGL3|Q5HGL3_STAAC	87.7	44	7	1	1	N	28046	Protein phosphatase 2C domain protein OS=Staphylococcus aureus (strain COL) GN=SACOL1231 PE=4 SV=1
637	1431	Q5HGQ5|Y1189_STAAC	80.7	43.66	8	1	1	N	17002	Uncharacterized N-acetyltransferase SACOL1189 OS=Staphylococcus aureus (strain COL) GN=SACOL1189 PE=3 SV=1
664	1237	Q5HH86|MECA_STAAC	66.7	43.64	8	2	2	Y	28311	Adapter protein MecA OS=Staphylococcus aureus (strain COL) GN=mecA PE=3 SV=1
647	2207	Q5HD48|Q5HD48_STAAC	60.6	43.56	3	1	1	Y	58095	Gluconokinase OS=Staphylococcus aureus (strain COL) GN=gntK PE=3 SV=1
685	1676	Q5HJB3|LRGB_STAAC	74.3	43.44	7	1	1	N	25097	Antiholin-like protein LrgB OS=Staphylococcus aureus (strain COL) GN=lrgB PE=3 SV=1
821	572	Q5HCZ3|COPA_STAAC	96.4	43.4	3	2	2	Y	86744	Copper-exporting P-type ATPase A OS=Staphylococcus aureus (strain COL) GN=copA PE=3 SV=1
618	1763	Q5HFR9|P5CR_STAAC	42	43.29	5	1	1	Y	29840	Pyrroline-5-carboxylate reductase OS=Staphylococcus aureus (strain COL) GN=proC PE=3 SV=1
762	1270	Q5HGC7|BSAA_STAAC	84.7	43.16	8	1	1	N	18118	Glutathione peroxidase homolog BsaA OS=Staphylococcus aureus (strain COL) GN=bsaA PE=3 SV=1
715	678	Q5HI34|Q5HI34_STAAC	94.8	43.14	14	2	2	N	24885	Iron-dependent repressor OS=Staphylococcus aureus (strain COL) GN=sirR PE=4 SV=1
780	926	Q5HFH2|Q5HFH2_STAAC	91.4	43.11	10	1	1	N	15763	ComE operon protein 2 OS=Staphylococcus aureus (strain COL) GN=SACOL1645 PE=3 SV=1
831	1366	Q5HFS3|Q5HFS3_STAAC	71.1	42.95	17	2	2	Y	20439	MutT/nudix family protein OS=Staphylococcus aureus (strain COL) GN=SACOL1542 PE=3 SV=1
1125	1057	Q5HJK6|Q5HJK6_STAAC	88.8	42.84	2	1	1	Y	44314	UDP-N-acetylglucosamine 2-epimerase OS=Staphylococcus aureus (strain COL) GN=cap5P PE=3 SV=1
829	655	Q5HG96|Q5HG96_STAAC	94.9	42.52	14	2	2	N	32851	Uncharacterized protein OS=Staphylococcus aureus (strain COL) GN=SACOL1358 PE=4 SV=1
1048	859	Q5HJX6|WALK_STAAC	92.5	42.49	2	1	1	N	69924	Sensor protein kinase WalK OS=Staphylococcus aureus (strain COL) GN=walK PE=3 SV=1
748	1139	Q5HJI5|Q5HJI5_STAAC	86.6	42.44	3	1	1	N	60539	Indole-3-pyruvate decarboxylase OS=Staphylococcus aureus (strain COL) GN=ipdC PE=3 SV=1
1282	1850	Q5HIT9|Q5HIT9_STAAC	69.9	42.27	6	1	1	N	28752	Uncharacterized protein OS=Staphylococcus aureus (strain COL) GN=SACOL0427 PE=4 SV=1
776	734	Q5HG06|ODO1_STAAC	94.1	42.01	2	1	1	N	105343	2-oxoglutarate dehydrogenase E1 component OS=Staphylococcus aureus (strain COL) GN=odhA PE=3 SV=1
650	892	Q5HIE6|CYSE_STAAC	92	41.82	6	1	1	N	23528	Serine acetyltransferase OS=Staphylococcus aureus (strain COL) GN=cysE PE=3 SV=1
819	1538	Q5HFS8|SCPB_STAAC	77.6	41.43	7	1	1	Y	20236	Segregation and condensation protein B OS=Staphylococcus aureus (strain COL) GN=scpB PE=3 SV=1
522	2172	P0C821|PSMA4_STAAC	61.6	41.21	40	1	1	N	2172	Phenol-soluble modulin alpha 4 peptide OS=Staphylococcus aureus (strain COL) GN=psmA4 PE=3 SV=1
1061	532	Q5HJF1|Q5HJF1_STAAC	94.3	40.87	6	1	1	Y	67717	Conserved domain protein OS=Staphylococcus aureus (strain COL) GN=SACOL0207 PE=4 SV=1
949	3681	Q5HJN2|Q5HJN2_STAAC	12	40.83	7	1	1	Y	25992	Purine nucleoside phosphorylase DeoD-type OS=Staphylococcus aureus (strain COL) GN=deoD PE=3 SV=1
847	2173	Q5HHY5|UPPP_STAAC	61.5	40.82	3	1	1	N	32284	Undecaprenyl-diphosphatase OS=Staphylococcus aureus (strain COL) GN=uppP PE=3 SV=1
1095	977	Q5HGE5|RNY_STAAC	90.4	40.76	5	2	2	Y	58512	Ribonuclease Y OS=Staphylococcus aureus (strain COL) GN=rny PE=3 SV=1
646	741	Q5HIL2|SLE1_STAAC	91.6	40.65	5	1	1	N	35836	N-acetylmuramoyl-L-alanine amidase sle1 OS=Staphylococcus aureus (strain COL) GN=sle1 PE=3 SV=1
922	764	Q5HJH4|Q5HJH4_STAAC	93.7	40.48	5	2	2	Y	59176	Peptide ABC transporter ATP-binding protein OS=Staphylococcus aureus (strain COL) GN=SACOL0184 PE=3 SV=1
751	802	Q5HCI5|RSMG_STAAC	93.3	40.07	6	2	2	N	27359	Ribosomal RNA small subunit methyltransferase G OS=Staphylococcus aureus (strain COL) GN=rsmG PE=3 SV=1
841	1776	Q5HEP9|Y1933_STAAC	71.8	39.85	5	1	1	N	18632	Uncharacterized protein SACOL1933 OS=Staphylococcus aureus (strain COL) GN=SACOL1933 PE=3 SV=1
1254	2876	Q5HEW4|SPLE_STAAC	20.4	39.76	6	1	1	Y	25679	Serine protease SplE OS=Staphylococcus aureus (strain COL) GN=splE PE=3 SV=1
598	1181	Q5HCR9|Q5HCR9_STAAC	86.5	39.66	7	1	1	N	17692	Transcriptional regulator putative OS=Staphylococcus aureus (strain COL) GN=SACOL2650 PE=4 SV=1
945	1201	Q5HIW7|Q5HIW7_STAAC	82.3	39.58	5	2	2	Y	38847	Lipoate-protein ligase A family protein OS=Staphylococcus aureus (strain COL) GN=SACOL0398 PE=3 SV=1
789	842	Q5HHS8|Q5HHS8_STAAC	92.8	39.51	4	1	1	Y	41798	Glycerate kinase family protein OS=Staphylococcus aureus (strain COL) GN=SACOL0805 PE=4 SV=1
893	756	Q5HIK5|Q5HIK5_STAAC	93.8	39.41	2	2	2	Y	166333	Glutamate synthase large subunit OS=Staphylococcus aureus (strain COL) GN=gltB PE=4 SV=1
930	1287	Q5HE67|Q5HE67_STAAC	84.2	39.25	6	3	3	Y	42958	Peptidase M20/M25/M40 family OS=Staphylococcus aureus (strain COL) GN=SACOL2125 PE=4 SV=1
972	1093	Q5HIY6|Q5HIY6_STAAC	83.9	38.78	1	1	1	Y	226040	Prophage L54a tail tape meausure protein TP901 family OS=Staphylococcus aureus (strain COL) GN=SACOL0379 PE=4 SV=1
549	4597	Q5HIW4|Q5HIW4_STAAC	6.6	38.68	14	1	1	Y	10398	Uncharacterized protein OS=Staphylococcus aureus (strain COL) GN=SACOL0401 PE=4 SV=1
1165	1133	Q5HGQ4|Y1190_STAAC	87.5	38.68	4	1	1	Y	62823	UPF0747 protein SACOL1190 OS=Staphylococcus aureus (strain COL) GN=SACOL1190 PE=3 SV=1
1035	615	Q5HGI2|TOP1_STAAC	95.7	38.55	2	1	1	Y	79113	DNA topoisomerase 1 OS=Staphylococcus aureus (strain COL) GN=topA PE=3 SV=1
1181	1192	Q5HJD4|Q5HJD4_STAAC	86.3	38.43	5	1	1	Y	33795	Inosine-uridine preferring nucleoside hydrolase OS=Staphylococcus aureus (strain COL) GN=SACOL0225 PE=4 SV=1
681	959	Q5HEW8|Q5HEW8_STAAC	90.5	38.35	3	1	1	N	46468	Type I restriction-modification enzyme S subunit EcoA family OS=Staphylococcus aureus (strain COL) GN=hsdS PE=4 SV=1
941	1131	Q5HJB4|LRGA_STAAC	87.6	38.26	7	1	1	N	15780	Antiholin-like protein LrgA OS=Staphylococcus aureus (strain COL) GN=lrgA PE=3 SV=1
557	1031	Q5HHQ1|WHIA_STAAC	89	38.04	3	1	1	N	35868	Putative sporulation transcription regulator WhiA OS=Staphylococcus aureus (strain COL) GN=whiA PE=3 SV=1
649	1069	Q5HET8|Q5HET8_STAAC	85.2	37.65	3	1	1	N	27717	ABC transporter ATP-binding protein OS=Staphylococcus aureus (strain COL) GN=SACOL1893 PE=3 SV=1
1113	995	Q5HJ87|ESSB_STAAC	90	37.5	2	1	1	N	52024	Protein EssB OS=Staphylococcus aureus (strain COL) GN=essB PE=3 SV=1
698	1144	Q5HEM5|Y1957_STAAC	87.4	37.23	2	1	1	N	51682	Uncharacterized RNA methyltransferase SACOL1957 OS=Staphylococcus aureus (strain COL) GN=SACOL1957 PE=3 SV=1
619	1420	Q5HDT7|Q5HDT7_STAAC	80.9	36.86	10	1	1	N	8871	Molybdopterin converting factor subunit 1 OS=Staphylococcus aureus (strain COL) GN=moaD PE=4 SV=1
1556	934	Q5HIP9|Q5HIP9_STAAC	91.3	36.81	11	2	2	Y	25647	Exotoxin 3 putative OS=Staphylococcus aureus (strain COL) GN=SACOL0468 PE=4 SV=1
896	791	Q5HF71|DPO3A_STAAC	93.5	36.76	2	2	2	N	122964	DNA polymerase III subunit alpha OS=Staphylococcus aureus (strain COL) GN=dnaE PE=3 SV=1
790	1944	Q5HGZ7|Q5HGZ7_STAAC	67.5	36.61	4	1	1	N	24283	TrkA potassium uptake family protein OS=Staphylococcus aureus (strain COL) GN=SACOL1096 PE=4 SV=1
728	2192	Q5HCZ2|COPZ_STAAC	61.3	36.55	16	1	1	N	7237	Copper chaperone CopZ OS=Staphylococcus aureus (strain COL) GN=copZ PE=3 SV=1
915	1099	Q5HDN2|Q5HDN2_STAAC	88	36.53	15	2	2	Y	20083	Uncharacterized protein OS=Staphylococcus aureus (strain COL) GN=SACOL2318 PE=4 SV=1
1176	931	Q5HGK5|FAPR_STAAC	89.5	36.24	5	1	1	N	21434	Transcription factor FapR OS=Staphylococcus aureus (strain COL) GN=fapR PE=3 SV=2
1010	1254	Q5HH63|HTRAL_STAAC	82	35.75	1	1	1	N	86432	Serine protease HtrA-like OS=Staphylococcus aureus (strain COL) GN=SACOL1028 PE=3 SV=1
845	1801	Q5HFI5|RS21_STAAC	71.3	35.73	17	1	1	N	6972	30S ribosomal protein S21 OS=Staphylococcus aureus (strain COL) GN=rpsU PE=3 SV=1
684	903	Q5HJF8|Q5HJF8_STAAC	91.1	35.33	2	1	1	Y	50995	Phosphoglycerate transporter family protein OS=Staphylococcus aureus (strain COL) GN=SACOL0200 PE=4 SV=1
597	1236	Q5HHW3|Q5HHW3_STAAC	71.9	35.33	5	1	1	N	17665	Uncharacterized protein OS=Staphylococcus aureus (strain COL) GN=SACOL0767 PE=4 SV=1
911	847	Q5HHV4|LTAS_STAAC	91.8	35.24	2	1	1	Y	74400	Lipoteichoic acid synthase OS=Staphylococcus aureus (strain COL) GN=ltaS PE=3 SV=1
1009	1117	Q5HEX0|Q5HEX0_STAAC	87.8	35.16	1	1	1	Y	120681	Uncharacterized protein OS=Staphylococcus aureus (strain COL) GN=SACOL1859 PE=4 SV=1
986	1114	Q5HGM4|Q5HGM4_STAAC	87.9	34.93	8	2	2	Y	65785	Fibronectin/fibrinogen binding-related protein OS=Staphylococcus aureus (strain COL) GN=SACOL1220 PE=4 SV=1
1163	1076	Q5HCT1|Q5HCT1_STAAC	88.1	34.91	6	1	1	Y	22542	Siroheme synthase putative OS=Staphylococcus aureus (strain COL) GN=SACOL2638 PE=4 SV=1
1089	775	Q5HD49|Q5HD49_STAAC	93.5	34.89	7	2	2	Y	48103	Gluconate transporter permease protein OS=Staphylococcus aureus (strain COL) GN=gntP PE=4 SV=1
764	1760	Q5HJF5|Q5HJF5_STAAC	72.1	34.88	2	1	1	N	36932	Iron compound ABC transporter iron compound-binding protein putative OS=Staphylococcus aureus (strain COL) GN=SACOL0203 PE=4 SV=1
1062	685	Q5HJB6|LYTS_STAAC	94	34.76	4	2	2	Y	65029	Sensor protein LytS OS=Staphylococcus aureus (strain COL) GN=lytS PE=3 SV=1
787	1901	Q5HFI6|Q5HFI6_STAAC	68.7	34.69	9	1	1	Y	26001	Uncharacterized protein OS=Staphylococcus aureus (strain COL) GN=SACOL1631 PE=4 SV=1
779	838	Q5HGN2|PYRB_STAAC	92.9	34.68	4	1	1	N	33258	Aspartate carbamoyltransferase OS=Staphylococcus aureus (strain COL) GN=pyrB PE=3 SV=1
1068	789	Q5HEC4|ATKB_STAAC	93.5	34.57	3	2	2	Y	73153	Potassium-transporting ATPase B chain OS=Staphylococcus aureus (strain COL) GN=kdpB PE=3 SV=1
969	800	Q5HE44|Q5HE44_STAAC	93.3	34.55	0	1	1	N	263030	SasB protein OS=Staphylococcus aureus (strain COL) GN=sasB PE=4 SV=1
629	869	Q5HHA8|Q5HHA8_STAAC	91.5	34.49	3	1	1	Y	43675	Isopropylmalate synthase-related protein OS=Staphylococcus aureus (strain COL) GN=SACOL0981 PE=4 SV=1
950	1867	Q5HDY1|RL36_STAAC	69.5	34.38	24	1	1	Y	4305	50S ribosomal protein L36 OS=Staphylococcus aureus (strain COL) GN=rpmJ PE=3 SV=1
1092	867	Q5HF69|Q5HF69_STAAC	92.4	34.33	6	2	2	Y	48531	CBS domain protein OS=Staphylococcus aureus (strain COL) GN=SACOL1752 PE=4 SV=1
916	897	Q5HEF0|Q5HEF0_STAAC	91.9	34.08	8	2	2	Y	24536	Uncharacterized protein OS=Staphylococcus aureus (strain COL) GN=SACOL2040 PE=4 SV=1
781	874	Q5HDS8|Q5HDS8_STAAC	92.1	33.82	6	1	1	N	29051	Molybdenum ABC transporter molybdenum-binding protein ModA OS=Staphylococcus aureus (strain COL) GN=modA PE=4 SV=1
838	2891	Q5HDE4|Q5HDE4_STAAC	42.7	33.82	9	1	1	Y	27229	Amino acid ABC transporter ATP-binding protein OS=Staphylococcus aureus (strain COL) GN=SACOL2410 PE=3 SV=1
701	1719	Q5HG67|Y1387_STAAC	71.1	33.77	7	1	1	N	11496	Uncharacterized protein SACOL1387 OS=Staphylococcus aureus (strain COL) GN=SACOL1387 PE=3 SV=1
925	1637	Q5HJM4|Q5HJM4_STAAC	74.5	33.57	2	1	1	Y	56302	Uncharacterized protein OS=Staphylococcus aureus (strain COL) GN=SACOL0129 PE=4 SV=1
931	2196	Q5HIB0|Q5HIB0_STAAC	60.1	33.54	2	1	1	Y	58418	Glycosyl transferase group 1 family protein OS=Staphylococcus aureus (strain COL) GN=SACOL0612 PE=4 SV=1
651	1028	Q5HHV5|Q5HHV5_STAAC	87.9	33.43	3	1	1	N	38134	Urea amidolyase-related protein OS=Staphylococcus aureus (strain COL) GN=SACOL0777 PE=4 SV=1
1106	953	Q5HHV3|Q5HHV3_STAAC	90.9	33.43	1	1	1	N	72437	ABC transporter ATP-binding protein OS=Staphylococcus aureus (strain COL) GN=SACOL0779 PE=3 SV=1
1369	841	Q5HDU7|Q5HDU7_STAAC	92.8	33.39	3	2	2	Y	114702	AcrB/AcrD/AcrF family protein OS=Staphylococcus aureus (strain COL) GN=SACOL2252 PE=4 SV=1
1300	3230	Q5HE16|LACG_STAAC	26.8	33.24	2	1	1	Y	54551	6-phospho-beta-galactosidase OS=Staphylococcus aureus (strain COL) GN=lacG PE=3 SV=1
678	746	Q5HHV0|Q5HHV0_STAAC	93.7	33.09	2	1	1	N	56058	Osmoprotectant ABC transporter permease protein OS=Staphylococcus aureus (strain COL) GN=opuBB PE=3 SV=1
1144	915	Q9RL68|MTLD_STAAC	91.7	33.04	2	1	1	N	40951	Mannitol-1-phosphate 5-dehydrogenase OS=Staphylococcus aureus (strain COL) GN=mtlD PE=3 SV=1
1593	905	Q5HJW3|Q5HJW3_STAAC	91.3	32.82	3	1	1	Y	76175	Penicillin-binding protein 2 OS=Staphylococcus aureus (strain COL) GN=mecA PE=1 SV=1
1162	1017	Q5HHC8|OAT2_STAAC	88.9	32.78	5	1	1	N	43418	Ornithine aminotransferase 2 OS=Staphylococcus aureus (strain COL) GN=rocD2 PE=3 SV=1
926	914	Q5HHN8|Q5HHN8_STAAC	91.7	32.76	9	2	2	N	28094	Carboxylesterase OS=Staphylococcus aureus (strain COL) GN=est PE=4 SV=1
932	3014	Q5HHU9|HIS8_STAAC	36.9	32.73	3	1	1	Y	39788	Histidinol-phosphate aminotransferase OS=Staphylococcus aureus (strain COL) GN=hisC PE=3 SV=1
1214	1011	Q5HIN5|Y482_STAAC	87.9	32.6	15	2	2	Y	30820	Uncharacterized lipoprotein SACOL0482 OS=Staphylococcus aureus (strain COL) GN=SACOL0482 PE=3 SV=1
1255	880	Q5HIJ3|Q5HIJ3_STAAC	92.2	32.54	6	1	1	Y	35516	DNA polymerase III delta prime subunit putative OS=Staphylococcus aureus (strain COL) GN=SACOL0526 PE=4 SV=1
1458	1175	Q5HG25|DAPA_STAAC	86.6	32.43	6	1	1	Y	32584	4-hydroxy-tetrahydrodipicolinate synthase OS=Staphylococcus aureus (strain COL) GN=dapA PE=1 SV=1
1077	737	Q5HJ56|Q5HJ56_STAAC	94.1	32.39	5	1	1	Y	32866	Pseudouridine-5'-phosphate glycosidase OS=Staphylococcus aureus (strain COL) GN=psuG PE=3 SV=1
740	680	Q5HIB9|Q5HIB9_STAAC	94.8	32.36	5	1	1	N	24992	Hydrolase haloacid dehalogenase-like family OS=Staphylococcus aureus (strain COL) GN=SACOL0602 PE=4 SV=1
942	1207	Q5HDG6|Q5HDG6_STAAC	86.1	32.16	4	1	1	Y	29127	Transcriptional regulator MerR family putative OS=Staphylococcus aureus (strain COL) GN=SACOL2388 PE=4 SV=1
1209	907	Q5HCV6|Q5HCV6_STAAC	91.3	32.13	3	1	1	Y	64248	Hydrolase CocE/NonD family OS=Staphylococcus aureus (strain COL) GN=SACOL2612 PE=1 SV=1
884	790	Q5HJX2|Q5HJX2_STAAC	93.5	32.09	5	2	2	Y	83425	5'-nucleotidase family protein OS=Staphylococcus aureus (strain COL) GN=sasH PE=4 SV=1
1111	868	Q5HHC5|ARLY_STAAC	92.4	31.76	6	2	2	Y	52017	Argininosuccinate lyase OS=Staphylococcus aureus (strain COL) GN=argH PE=3 SV=1
1417	1023	Q5HGF5|FTSK_STAAC	89.5	31.76	1	1	1	Y	88173	DNA translocase FtsK OS=Staphylococcus aureus (strain COL) GN=ftsK PE=3 SV=2
1237	997	Q5HHS0|Q5HHS0_STAAC	89.7	31.68	7	1	1	Y	42112	Comf operon protein 1 putative OS=Staphylococcus aureus (strain COL) GN=SACOL0813 PE=4 SV=1
1185	1134	Q5HFK3|END4_STAAC	84.7	31.67	6	1	1	Y	33159	Probable endonuclease 4 OS=Staphylococcus aureus (strain COL) GN=nfo PE=3 SV=1
1160	975	Q5HI15|Q5HI15_STAAC	90.5	31.49	8	1	1	N	19009	Uncharacterized protein OS=Staphylococcus aureus (strain COL) GN=SACOL0710 PE=4 SV=1
1228	1501	Q5HJS2|Y080_STAAC	78.7	31.15	10	2	2	Y	29791	Uncharacterized lipoprotein SACOL0080 OS=Staphylococcus aureus (strain COL) GN=SACOL0080 PE=3 SV=1
1242	1329	Q5HD33|Q5HD33_STAAC	83.2	31.13	7	1	1	Y	16516	Transcriptional regulator MarR family OS=Staphylococcus aureus (strain COL) GN=SACOL2531 PE=4 SV=1
1194	924	Q5HI45|MNHA2_STAAC	86.7	31.11	6	2	2	Y	89687	Putative antiporter subunit mnhA2 OS=Staphylococcus aureus (strain COL) GN=mnhA2 PE=3 SV=1
1079	711	Q5HFE3|Q5HFE3_STAAC	93.3	31.04	2	1	1	N	93049	Helicase putative RecD/TraA family OS=Staphylococcus aureus (strain COL) GN=SACOL1674 PE=4 SV=1
933	833	Q5HH05|Q5HH05_STAAC	92.7	31	6	2	2	N	50454	Uncharacterized protein OS=Staphylococcus aureus (strain COL) GN=SACOL1088 PE=4 SV=1
1446	1039	Q5HCP8|SECA2_STAAC	89.3	30.64	0	0	0	N	90930	Protein translocase subunit SecA 2 OS=Staphylococcus aureus (strain COL) GN=secA2 PE=3 SV=1
1085	1304	Q5HGY2|Q5HGY2_STAAC	83.8	30.44	5	1	1	N	41471	Spermidine/putrescine ABC transporter spermidine/putrescine-binding protein OS=Staphylococcus aureus (strain COL) GN=SACOL1111 PE=4 SV=1
820	1612	Q5HEJ2|Q5HEJ2_STAAC	75.5	30.4	9	1	1	Y	20589	Uncharacterized protein OS=Staphylococcus aureus (strain COL) GN=SACOL1991 PE=4 SV=1
1283	1477	Q5HGN3|Q5HGN3_STAAC	65.7	30.32	6	1	1	Y	46610	Uracil permease OS=Staphylococcus aureus (strain COL) GN=uraA PE=4 SV=1
1280	1376	Q5HHG3|Q5HHG3_STAAC	71	30.15	4	1	1	Y	33317	Uncharacterized protein OS=Staphylococcus aureus (strain COL) GN=SACOL0924 PE=4 SV=1
1266	2686	Q5HCR4|Q5HCR4_STAAC	48.2	30.13	8	1	1	Y	51717	Arginine/ornithine antiporter OS=Staphylococcus aureus (strain COL) GN=arcD PE=4 SV=1
1187	1215	Q5HFJ8|DNAG_STAAC	83.9	30.02	2	1	1	Y	69294	DNA primase OS=Staphylococcus aureus (strain COL) GN=dnaG PE=3 SV=1
1211	1005	Q5HHY7|Y741_STAAC	89.5	30	19	2	2	Y	17258	UPF0178 protein SACOL0741 OS=Staphylococcus aureus (strain COL) GN=SACOL0741 PE=3 SV=1
757	1089	Q5HF70|Q5HF70_STAAC	88.2	29.95	5	1	1	N	35097	DHH subfamily 1 protein OS=Staphylococcus aureus (strain COL) GN=SACOL1751 PE=4 SV=1
1273	1451	Q5HH79|Q5HH79_STAAC	78.9	29.93	11	1	1	Y	25239	GTP pyrophosphokinase OS=Staphylococcus aureus (strain COL) GN=relA1 PE=4 SV=1
1227	1274	Q5HCQ6|Q5HCQ6_STAAC	79.4	29.56	1	1	1	N	69856	PTS system fructose-specific IIABC components OS=Staphylococcus aureus (strain COL) GN=SACOL2663 PE=4 SV=1
1247	1708	Q5HH18|PUR7_STAAC	71.5	29.55	7	1	1	Y	26693	Phosphoribosylaminoimidazole-succinocarboxamide synthase OS=Staphylococcus aureus (strain COL) GN=purC PE=3 SV=1
628	1924	Q5HD25|Q5HD25_STAAC	68.1	29.5	4	1	1	N	23541	Sortase OS=Staphylococcus aureus (strain COL) GN=srtA PE=4 SV=1
1038	902	Q5HJE9|Q5HJE9_STAAC	91.9	29.49	1	1	1	N	71718	Staphylocoagulase OS=Staphylococcus aureus (strain COL) GN=SACOL0209 PE=4 SV=1
1158	906	Q5HEP7|Q5HEP7_STAAC	91.5	29.49	5	2	2	N	44166	Uncharacterized protein OS=Staphylococcus aureus (strain COL) GN=SACOL1935 PE=4 SV=1
1218	1238	Q5HH73|Q5HH73_STAAC	85.4	29.3	3	1	1	Y	56632	Sodium:alanine symporter family protein OS=Staphylococcus aureus (strain COL) GN=SACOL1018 PE=4 SV=1
1230	1600	Q5HFV7|AROC_STAAC	75.5	29.29	3	1	1	Y	43047	Chorismate synthase OS=Staphylococcus aureus (strain COL) GN=aroC PE=3 SV=1
1161	992	Q5HEQ5|Q5HEQ5_STAAC	89.7	29.18	4	1	1	N	37083	Uncharacterized protein OS=Staphylococcus aureus (strain COL) GN=SACOL1927 PE=4 SV=1
1261	1026	Q5HFU5|Q5HFU5_STAAC	85.1	28.98	6	1	1	N	35579	L-asparaginase OS=Staphylococcus aureus (strain COL) GN=ansA PE=3 SV=1
1198	1312	Q5HJV2|Q5HJV2_STAAC	83.6	28.87	2	1	1	N	62591	Uncharacterized protein OS=Staphylococcus aureus (strain COL) GN=SACOL0045 PE=4 SV=1
750	943	Q5HDA0|Q5HDA0_STAAC	91.2	28.84	2	1	1	N	51996	Para-nitrobenzyl esterase OS=Staphylococcus aureus (strain COL) GN=pnbA PE=4 SV=1
1249	2532	Q5HHA5|Q5HHA5_STAAC	49.2	28.77	6	1	1	Y	19149	Uncharacterized protein OS=Staphylococcus aureus (strain COL) GN=SACOL0984 PE=4 SV=1
982	974	Q5HHY3|Q5HHY3_STAAC	90.5	28.71	2	1	1	N	63286	ABC transporter ATP-binding protein MsbA family OS=Staphylococcus aureus (strain COL) GN=SACOL0745 PE=4 SV=1
1269	1275	Q5HE07|NPD_STAAC	84.5	28.66	5	1	1	N	27066	NAD-dependent protein deacetylase OS=Staphylococcus aureus (strain COL) GN=cobB PE=3 SV=1
1513	1276	Q5HD51|FNBA_STAAC	84.5	28.33	2	2	2	Y	111709	Fibronectin-binding protein A OS=Staphylococcus aureus (strain COL) GN=fnbA PE=3 SV=1
1849	2035	Q5HDC8|Q5HDC8_STAAC	61.6	28.3	2	1	1	Y	51404	Adenosylmethionine-8-amino-7-oxononanoate aminotransferase OS=Staphylococcus aureus (strain COL) GN=bioA PE=3 SV=1
1398	1009	Q5HDF6|Q5HDF6_STAAC	89.8	28.03	2	1	1	N	88657	Nitrite reductase [NAD(P)H] large subunit OS=Staphylococcus aureus (strain COL) GN=nirB PE=4 SV=1
2110	1136	Q5HJD3|Q5HJD3_STAAC	86.9	27.9	2	1	1	Y	81299	Transcriptional antiterminator BglG family OS=Staphylococcus aureus (strain COL) GN=SACOL0228 PE=4 SV=1
2312	1957	Q5HCK1|Q5HCK1_STAAC	59.7	27.85	16	2	2	Y	21347	Uncharacterized protein OS=Staphylococcus aureus (strain COL) GN=SACOL2720 PE=4 SV=1
1202	1429	Q5HI08|GRAS_STAAC	80.8	27.82	8	1	1	Y	41079	Sensor histidine kinase GraS OS=Staphylococcus aureus (strain COL) GN=graS PE=1 SV=1
1257	1072	Q5HD45|Q5HD45_STAAC	88.6	27.82	4	1	1	N	27165	Uncharacterized protein OS=Staphylococcus aureus (strain COL) GN=SACOL2518 PE=4 SV=1
1635	1271	Q5HJW0|Q5HJW0_STAAC	84.4	27.57	3	1	1	Y	60734	IS1272 transposase OS=Staphylococcus aureus (strain COL) GN=SACOL0036 PE=4 SV=1
1193	1027	Q5HIA0|VRAB_STAAC	89.5	27.57	4	1	1	Y	41022	Putative acetyl-CoA C-acetyltransferase VraB OS=Staphylococcus aureus (strain COL) GN=vraB PE=3 SV=1
1881	1243	Q5HH47|Q5HH47_STAAC	85.3	27.4	14	2	2	Y	35566	Iron compound ABC transporter iron compound-binding protein OS=Staphylococcus aureus (strain COL) GN=SACOL1045 PE=4 SV=1
1174	922	Q5HIG6|TILS_STAAC	91.3	27.32	2	1	1	Y	51292	tRNA(Ile)-lysidine synthase OS=Staphylococcus aureus (strain COL) GN=tilS PE=3 SV=1
920	1043	Q5HIM1|Q5HIM1_STAAC	89.2	26.59	4	1	1	N	25756	PAP2 family protein OS=Staphylococcus aureus (strain COL) GN=SACOL0498 PE=4 SV=1
1217	1086	Q5HFQ6|Q5HFQ6_STAAC	85.9	26.58	4	1	1	Y	46740	2-oxoisovalerate dehydrogenase E2 component dihydrolipoamide acetyltransferase OS=Staphylococcus aureus (strain COL) GN=SACOL1560 PE=3 SV=1
2124	1592	Q5HDH8|Q5HDH8_STAAC	76.2	26.4	5	1	1	Y	36361	Transporter CorA family OS=Staphylococcus aureus (strain COL) GN=SACOL2375 PE=4 SV=1
2109	1128	Q5HH92|Q5HH92_STAAC	87.6	26.34	7	1	1	Y	37004	Oligopeptide ABC transporter ATP-binding protein OS=Staphylococcus aureus (strain COL) GN=SACOL0997 PE=3 SV=1
1606	1400	Q5HJ96|Q5HJ96_STAAC	81.1	26.24	4	1	1	Y	44536	Uncharacterized protein OS=Staphylococcus aureus (strain COL) GN=SACOL0266 PE=4 SV=1
2323	2312	Q5HI35|Q5HI35_STAAC	56.7	26.2	9	1	1	Y	28024	ABC transporter ATP-binding protein OS=Staphylococcus aureus (strain COL) GN=SACOL0690 PE=3 SV=1
2413	1213	Q5HGI4|Q5HGI4_STAAC	85.8	26.17	3	1	1	Y	49117	Endopeptidase resistance protein OS=Staphylococcus aureus (strain COL) GN=eprH PE=4 SV=1
944	2128	Q5HDB1|Q5HDB1_STAAC	62.5	26.12	8	1	1	N	31192	Epimerase/dehydratase putative OS=Staphylococcus aureus (strain COL) GN=SACOL2446 PE=4 SV=1
1813	1441	Q5HJX3|Q5HJX3_STAAC	80.5	26.03	5	1	1	N	30328	Metallo-beta-lactamase family protein YycJ OS=Staphylococcus aureus (strain COL) GN=yycJ PE=4 SV=1
1600	1226	Q5HCP3|SRAP_STAAC	85.6	25.91	0	0	0	N	227019	Serine-rich adhesin for platelets OS=Staphylococcus aureus (strain COL) GN=sraP PE=3 SV=1
2954	2728	Q5HJJ0|ARGJ_STAAC	47.1	25.64	0	0	0	N	44400	Arginine biosynthesis bifunctional protein ArgJ OS=Staphylococcus aureus (strain COL) GN=argJ PE=3 SV=1
929	1152	Q5HDM2|LYRA_STAAC	86.3	25.6	2	1	1	N	46814	Lysostaphin resistance protein A OS=Staphylococcus aureus (strain COL) GN=lyrA PE=3 SV=1
1811	1387	Q5HJX5|Q5HJX5_STAAC	81.8	25.53	0	0	0	N	50925	YycH protein OS=Staphylococcus aureus (strain COL) GN=yycH PE=4 SV=1
1998	1659	Q5HGA3|CLS1_STAAC	74.1	25.46	4	1	1	N	56366	Cardiolipin synthase 1 OS=Staphylococcus aureus (strain COL) GN=cls1 PE=3 SV=1
1301	3583	Q5HI57|Q5HI57_STAAC	12.6	25.38	4	1	1	Y	34605	Iron compound ABC transporter permease protein OS=Staphylococcus aureus (strain COL) GN=SACOL0666 PE=4 SV=1
1293	1581	Q5HIH8|SP5G_STAAC	61.7	25.37	16	1	1	Y	11278	Putative septation protein SpoVG OS=Staphylococcus aureus (strain COL) GN=spoVG PE=3 SV=1
1286	3466	Q5HJH6|Q5HJH6_STAAC	26.5	25.34	6	1	1	Y	35548	Uncharacterized protein OS=Staphylococcus aureus (strain COL) GN=SACOL0182 PE=4 SV=1
1259	1194	Q5HJW8|Q5HJW8_STAAC	86.4	25.31	5	1	1	Y	26915	IS431mec transposase OS=Staphylococcus aureus (strain COL) GN=SACOL0028 PE=4 SV=1
1355	1161	Q5HJ86|ESSC_STAAC	87	25.18	1	1	1	Y	170930	Protein EssC OS=Staphylococcus aureus (strain COL) GN=essC PE=3 SV=1
1882	1264	Q5HGM8|PYRF_STAAC	84.8	25.15	0	0	0	N	25596	Orotidine 5'-phosphate decarboxylase OS=Staphylococcus aureus (strain COL) GN=pyrF PE=3 SV=1
1680	1259	Q5HCY9|CRTN_STAAC	84.7	25.13	0	0	0	N	56689	Dehydrosqualene desaturase OS=Staphylococcus aureus (strain COL) GN=crtN PE=3 SV=1
1474	1182	Q5HJU7|PLS_STAAC	86.6	25	0	0	0	N	164848	Putative surface protein SACOL0050 OS=Staphylococcus aureus (strain COL) GN=SACOL0050 PE=4 SV=1
2437	1492	Q5HJP5|Q5HJP5_STAAC	72.5	24.97	0	0	0	N	29633	Uncharacterized protein OS=Staphylococcus aureus (strain COL) GN=SACOL0108 PE=4 SV=1
2425	1530	Q5HIP8|Q5HIP8_STAAC	77.9	24.96	0	0	0	N	26500	Exotoxin 1 putative OS=Staphylococcus aureus (strain COL) GN=SACOL0469 PE=4 SV=1
1303	4376	Q5HG90|KHSE_STAAC	9.4	24.87	10	1	1	Y	33267	Homoserine kinase OS=Staphylococcus aureus (strain COL) GN=thrB PE=3 SV=1
1156	2157	Q5HJA5|Q5HJA5_STAAC	61.7	24.84	2	1	1	Y	36658	Ribose operon repressor putative OS=Staphylococcus aureus (strain COL) GN=SACOL0257 PE=4 SV=1
1610	1527	Q5HFT1|SRRB_STAAC	77.9	24.76	0	0	0	N	66076	Sensor protein SrrB OS=Staphylococcus aureus (strain COL) GN=srrB PE=2 SV=1
3620	1998	Q5HJW1|Q5HJW1_STAAC	46.8	24.75	0	0	0	N	9923	Uncharacterized protein OS=Staphylococcus aureus (strain COL) GN=SACOL0035 PE=4 SV=1
1885	1391	Q5HGV1|ISDE_STAAC	81.7	24.71	0	0	0	N	33271	High-affinity heme uptake system protein IsdE OS=Staphylococcus aureus (strain COL) GN=isdE PE=3 SV=1
1808	1253	Q5HG07|ODO2_STAAC	84.1	24.61	0	0	0	N	46673	Dihydrolipoyllysine-residue succinyltransferase component of 2-oxoglutarate dehydrogenase complex OS=Staphylococcus aureus (strain COL) GN=odhB PE=3 SV=1
1213	1068	Q5HGZ2|Q5HGZ2_STAAC	88.7	24.47	6	1	1	N	23875	Uncharacterized protein OS=Staphylococcus aureus (strain COL) GN=SACOL1101 PE=4 SV=1
1891	1116	Q5HD43|Q5HD43_STAAC	76.6	24.41	0	0	0	N	70877	Membrane protein putative OS=Staphylococcus aureus (strain COL) GN=SACOL2520 PE=4 SV=1
1979	1278	Q5HHM8|CLFA_STAAC	81.7	24.18	0	0	0	N	96998	Clumping factor A OS=Staphylococcus aureus (strain COL) GN=clfA PE=3 SV=1
1207	2915	Q5HEV5|Q5HEV5_STAAC	42	24.08	2	1	1	Y	50735	Epidermin leader peptide processing serine protease EpiP OS=Staphylococcus aureus (strain COL) GN=epiP PE=1 SV=1
1016	919	Q5HFY2|Q5HFY2_STAAC	91.6	24.06	1	1	1	N	133107	Uncharacterized protein OS=Staphylococcus aureus (strain COL) GN=SACOL1480 PE=4 SV=1
2750	1859	Q5HJR4|Q5HJR4_STAAC	44.4	23.99	0	0	0	N	60648	Na/Pi cotransporter family protein OS=Staphylococcus aureus (strain COL) GN=SACOL0088 PE=4 SV=1
917	1179	Q5HHN2|Q5HHN2_STAAC	86.6	23.91	5	1	1	N	28391	Uncharacterized protein OS=Staphylococcus aureus (strain COL) GN=SACOL0851 PE=4 SV=1
2414	1266	Q5HHE0|Q5HHE0_STAAC	84.8	23.75	0	0	0	N	43955	Uncharacterized protein OS=Staphylococcus aureus (strain COL) GN=SACOL0948 PE=4 SV=1
1450	1373	Q5HHB7|ADDA_STAAC	82.3	23.72	0	0	0	N	141261	ATP-dependent helicase/nuclease subunit A OS=Staphylococcus aureus (strain COL) GN=addA PE=3 SV=1
1182	1234	Q5HG38|OPPB2_STAAC	85.4	23.71	5	1	1	Y	36814	Putative oligopeptide transport system permease protein oppB2 OS=Staphylococcus aureus (strain COL) GN=oppB2 PE=3 SV=1
921	1176	Q5HHK2|Q5HHK2_STAAC	85.9	23.69	4	1	1	N	30351	Lipoprotein OS=Staphylococcus aureus (strain COL) GN=SACOL0884 PE=3 SV=1
2435	1732	Q5HEC5|ATKC_STAAC	72.8	23.64	0	0	0	N	20691	Potassium-transporting ATPase C chain OS=Staphylococcus aureus (strain COL) GN=kdpC PE=3 SV=1
1617	1887	Q5HEJ0|Q5HEJ0_STAAC	68.6	23.62	0	0	0	N	28139	Uncharacterized protein OS=Staphylococcus aureus (strain COL) GN=SACOL1993 PE=4 SV=1
1164	1132	Q5HHA9|Q5HHA9_STAAC	87.6	23.4	5	1	1	N	33799	Transcriptional regulator LysR family OS=Staphylococcus aureus (strain COL) GN=SACOL0980 PE=4 SV=1
1234	1825	Q5HDN3|Q5HDN3_STAAC	56.5	23.39	4	1	1	Y	29785	Phosphosugar-binding transcriptional regulator OS=Staphylococcus aureus (strain COL) GN=SACOL2317 PE=4 SV=1
1304	2044	Q5HI03|Q5HI03_STAAC	64.7	23.37	5	1	1	N	28187	LysM domain protein OS=Staphylococcus aureus (strain COL) GN=SACOL0723 PE=4 SV=1
1099	1035	Q5HFI8|Q5HFI8_STAAC	89.3	23.23	5	1	1	N	27256	Uncharacterized protein OS=Staphylococcus aureus (strain COL) GN=SACOL1629 PE=4 SV=1
2383	3047	Q5HJK0|Q5HJK0_STAAC	38.5	23.07	0	0	0	N	19257	Uncharacterized protein OS=Staphylococcus aureus (strain COL) GN=SACOL0157 PE=4 SV=1
1166	1157	Q5HIZ6|Q5HIZ6_STAAC	87.1	23.05	5	1	1	N	29170	Prophage L54a Clp protease putative OS=Staphylococcus aureus (strain COL) GN=SACOL0369 PE=4 SV=1
828	1325	Q5HHG5|Q5HHG5_STAAC	83.3	23.03	2	1	1	N	38986	CBS domain protein OS=Staphylococcus aureus (strain COL) GN=SACOL0921 PE=4 SV=1
1204	2046	Q5HEG5|AGRB_STAAC	64.7	23.01	4	1	1	N	21930	Accessory gene regulator protein B OS=Staphylococcus aureus (strain COL) GN=agrB PE=3 SV=1
1107	1138	Q5HD53|Q5HD53_STAAC	87.4	22.97	2	1	1	Y	103555	Fibronectin binding protein B OS=Staphylococcus aureus (strain COL) GN=fnbB PE=3 SV=1
1075	1159	Q5HEW3|SPLD_STAAC	87.1	22.92	3	1	1	N	25669	Serine protease SplD OS=Staphylococcus aureus (strain COL) GN=splD PE=3 SV=1
1075	1162	Q5HEW5|SPLF_STAAC	87	30.92	3	1	1	N	25655	Serine protease SplF OS=Staphylococcus aureus (strain COL) GN=splF PE=3 SV=1
1294	2299	Q5HCM5|HIS2_STAAC	58.2	22.84	4	1	1	Y	23973	Histidine biosynthesis bifunctional protein HisIE OS=Staphylococcus aureus (strain COL) GN=hisI PE=3 SV=1
904	1054	Q5HCL1|Q5HCL1_STAAC	67	22.79	10	1	1	Y	31439	Uncharacterized protein OS=Staphylococcus aureus (strain COL) GN=SACOL2710 PE=4 SV=1
1220	1359	Q5HG63|Q5HG63_STAAC	82.5	22.67	3	1	1	Y	52774	Sodium:alanine symporter family protein OS=Staphylococcus aureus (strain COL) GN=SACOL1392 PE=4 SV=1
1145	979	Q5HIU3|Q5HIU3_STAAC	89.5	22.51	4	1	1	Y	31594	ABC transporter ATP-binding protein OS=Staphylococcus aureus (strain COL) GN=SACOL0422 PE=4 SV=1
1151	1190	Q5HH40|MEND_STAAC	86.4	22.48	3	1	1	N	63078	2-succinyl-5-enolpyruvyl-6-hydroxy-3-cyclohexene-1-carboxylate synthase OS=Staphylococcus aureus (strain COL) GN=menD PE=3 SV=1
947	3471	Q5HG88|Q5HG88_STAAC	26.2	22.44	12	1	1	Y	12284	Uncharacterized protein OS=Staphylococcus aureus (strain COL) GN=SACOL1366 PE=4 SV=1
1251	2652	Q5HFV9|AROA_STAAC	45.3	22.43	3	1	1	Y	47029	3-phosphoshikimate 1-carboxyvinyltransferase OS=Staphylococcus aureus (strain COL) GN=aroA PE=3 SV=1
1233	2334	Q5HDU4|Y2256_STAAC	57.6	22.42	5	1	1	N	17152	Uncharacterized HTH-type transcriptional regulator SACOL2256 OS=Staphylococcus aureus (strain COL) GN=SACOL2256 PE=4 SV=1
937	1078	Q5HIU4|Q5HIU4_STAAC	85.7	22.34	4	1	1	N	26784	Uncharacterized protein OS=Staphylococcus aureus (strain COL) GN=SACOL0421 PE=4 SV=1
1275	1706	Q5HH35|SSPA_STAAC	73.2	22.24	4	1	1	N	36313	Glutamyl endopeptidase OS=Staphylococcus aureus (strain COL) GN=sspA PE=3 SV=1
1229	1486	Q5HDG1|Q5HDG1_STAAC	78.3	22.2	5	1	1	N	22925	Respiratory nitrate reductase delta subunit OS=Staphylococcus aureus (strain COL) GN=narJ PE=4 SV=1
1215	1140	Q5HJL7|Q5HJL7_STAAC	87.4	22.11	7	1	1	Y	38567	Capsular polysaccharide biosynthesis protein Cap5E OS=Staphylococcus aureus (strain COL) GN=cap5E PE=4 SV=1
1056	884	Q5HGG7|DPO3_STAAC	91.3	22.07	1	1	1	Y	162662	DNA polymerase III PolC-type OS=Staphylococcus aureus (strain COL) GN=polC PE=3 SV=2
1132	1221	Q5HJF6|Y202_STAAC	85.7	21.93	2	1	1	Y	61047	Uncharacterized sensor-like histidine kinase SACOL0202 OS=Staphylococcus aureus (strain COL) GN=SACOL0202 PE=2 SV=1
1263	1424	Q5HGU3|Q5HGU3_STAAC	80.9	21.93	27	1	1	Y	10281	Uncharacterized protein OS=Staphylococcus aureus (strain COL) GN=SACOL1151 PE=3 SV=1
1224	1375	Q5HFR5|Q5HFR5_STAAC	80.9	21.92	3	1	1	N	63906	Alpha-glucosidase OS=Staphylococcus aureus (strain COL) GN=malA PE=3 SV=1
1054	1015	Q5HGM0|Q5HGM0_STAAC	89.7	21.92	1	1	1	N	92522	Primosomal protein N OS=Staphylococcus aureus (strain COL) GN=priA PE=4 SV=1
1130	983	Q5HF78|Q5HF78_STAAC	90.2	21.86	4	1	1	N	42593	Citrate synthase OS=Staphylococcus aureus (strain COL) GN=gltA PE=3 SV=1
1082	973	Q5HIT7|Q5HIT7_STAAC	90.2	21.8	2	1	1	N	68478	Methylenetetrahydrofolate reductase OS=Staphylococcus aureus (strain COL) GN=SACOL0429 PE=3 SV=1
1116	1122	Q5HF48|Q5HF48_STAAC	87.7	21.78	5	1	1	Y	53087	PTS system IIBC components OS=Staphylococcus aureus (strain COL) GN=SACOL1775 PE=4 SV=1
826	1907	Q5HI79|Q5HI79_STAAC	68.6	21.75	3	1	1	Y	51611	Uncharacterized protein OS=Staphylococcus aureus (strain COL) GN=SACOL0643 PE=4 SV=1
1136	1818	Q5HE50|Q5HE50_STAAC	70.8	21.72	4	1	1	Y	29006	ABC transporter ATP-binding protein OS=Staphylococcus aureus (strain COL) GN=SACOL2144 PE=1 SV=1
1239	1147	Q5HCP6|Q5HCP6_STAAC	87.3	21.52	3	1	1	Y	59669	Accessory secretory protein Asp2 OS=Staphylococcus aureus (strain COL) GN=SACOL2673 PE=4 SV=1
1302	3805	Q5HCV2|Q5HCV2_STAAC	9.4	21.4	7	1	1	Y	32358	2-dehydropantoate 2-reductase OS=Staphylococcus aureus (strain COL) GN=SACOL2616 PE=3 SV=1
1221	1386	Q5HHW5|SAES_STAAC	81.9	21.33	3	1	1	N	39742	Histidine protein kinase SaeS OS=Staphylococcus aureus (strain COL) GN=saeS PE=1 SV=1
1169	1453	Q5HER2|Q5HER2_STAAC	80.2	21.29	5	1	1	Y	35953	D-isomer specific 2-hydroxyacid dehydrogenase family protein OS=Staphylococcus aureus (strain COL) GN=SACOL1920 PE=3 SV=1
1120	1225	Q5HEF4|Q5HEF4_STAAC	85.3	21.22	2	1	1	N	74446	ABC transporter ATP-binding protein OS=Staphylococcus aureus (strain COL) GN=SACOL2036 PE=3 SV=1
1245	956	Q5HEN7|Q5HEN7_STAAC	79.1	21.14	10	1	1	Y	15290	Uncharacterized protein OS=Staphylococcus aureus (strain COL) GN=SACOL1945 PE=4 SV=1
1216	1177	Q5HDX8|SECY_STAAC	86	21.13	3	1	1	Y	47148	Protein translocase subunit SecY OS=Staphylococcus aureus (strain COL) GN=secY PE=3 SV=1
1033	1130	Q5HGD5|MUTL_STAAC	87.4	21.06	3	1	1	Y	76855	DNA mismatch repair protein MutL OS=Staphylococcus aureus (strain COL) GN=mutL PE=3 SV=1
1188	1374	Q5HJR6|Q5HJR6_STAAC	82.3	21.04	2	1	1	N	48952	Drug transporter putative OS=Staphylococcus aureus (strain COL) GN=SACOL0086 PE=4 SV=1
1252	1481	Q5HGD8|Q5HGD8_STAAC	43.3	20.98	10	1	1	Y	14150	Uncharacterized protein OS=Staphylococcus aureus (strain COL) GN=SACOL1313 PE=4 SV=1
1235	2435	Q5HEE2|LEUC_STAAC	54.6	20.95	4	1	1	Y	50326	3-isopropylmalate dehydratase large subunit OS=Staphylococcus aureus (strain COL) GN=leuC PE=3 SV=1
1134	1273	Q5HHK7|Q5HHK7_STAAC	83.3	20.91	3	1	1	Y	33501	Uncharacterized protein OS=Staphylococcus aureus (strain COL) GN=SACOL0879 PE=4 SV=1
1292	2057	Q5HJ46|Q5HJ46_STAAC	64.5	20.86	3	1	1	N	27830	Uncharacterized protein OS=Staphylococcus aureus (strain COL) GN=SACOL0319 PE=4 SV=1
1271	1408	Q5HEA1|FABZ_STAAC	81.3	20.85	8	1	1	Y	16082	3-hydroxyacyl-[acyl-carrier-protein] dehydratase FabZ OS=Staphylococcus aureus (strain COL) GN=fabZ PE=3 SV=1
1118	1196	Q5HHK1|Q5HHK1_STAAC	86.3	20.66	3	1	1	N	47587	Pathogenicity island protein integrase OS=Staphylococcus aureus (strain COL) GN=SACOL0885 PE=4 SV=1
1299	2900	Q5HFQ9|Q5HFQ9_STAAC	42.5	20.59	4	1	1	Y	36973	Uncharacterized protein OS=Staphylococcus aureus (strain COL) GN=SACOL1557 PE=4 SV=1
1012	1251	Q5HGU4|RNH3_STAAC	85.1	20.57	5	1	1	Y	35055	Ribonuclease HIII OS=Staphylococcus aureus (strain COL) GN=rnhC PE=3 SV=1
1167	1155	Q5HHW7|Q5HHW7_STAAC	86.7	20.5	4	1	1	N	32360	Oxidoreductase aldo/keto reductase family OS=Staphylococcus aureus (strain COL) GN=SACOL0763 PE=4 SV=1
1108	1317	Q5HIJ6|Q5HIJ6_STAAC	83.5	20.48	3	1	1	N	51021	Orn/Lys/Arg decarboxylase OS=Staphylococcus aureus (strain COL) GN=SACOL0523 PE=4 SV=1
1226	1474	Q5HG99|Q5HG99_STAAC	79.7	20.45	7	1	1	N	22783	DNA-binding response regulator LuxR family OS=Staphylococcus aureus (strain COL) GN=SACOL1355 PE=4 SV=1
1231	1624	Q5HHQ6|ATRF1_STAAC	75.4	20.31	7	1	1	Y	18186	Putative acetyltransferase SACOL0827 OS=Staphylococcus aureus (strain COL) GN=SACOL0827 PE=3 SV=1
1086	1337	Q5HGM1|Q5HGM1_STAAC	82.8	20.3	9	1	1	Y	44400	Phosphopantothenoylcysteine decarboxylase/phosphopantothenate--cysteine ligase OS=Staphylococcus aureus (strain COL) GN=coaBC PE=4 SV=1
1184	1000	Q5HIN0|Q5HIN0_STAAC	84.9	20.24	2	1	1	Y	49149	Uncharacterized protein OS=Staphylococcus aureus (strain COL) GN=SACOL0487 PE=4 SV=1
1277	1625	Q5HH19|PURK_STAAC	72.2	20.24	8	1	1	Y	42493	N5-carboxyaminoimidazole ribonucleotide synthase OS=Staphylococcus aureus (strain COL) GN=purK PE=3 SV=1
1040	1106	Q5HD57|Q5HD57_STAAC	87.9	20.12	2	1	1	N	136345	Cell wall surface anchor family protein OS=Staphylococcus aureus (strain COL) GN=sasG PE=3 SV=1
1155	1388	Q5HJ54|Q5HJ54_STAAC	79.4	20.07	2	1	1	N	55814	Sodium:solute symporter family protein OS=Staphylococcus aureus (strain COL) GN=SACOL0311 PE=3 SV=1
1170	1959	Q5HGL9|Q5HGL9_STAAC	67.2	20.05	8	1	1	Y	35907	Uncharacterized protein OS=Staphylococcus aureus (strain COL) GN=SACOL1225 PE=4 SV=1
1309	2740	Q5HIA8|Q5HIA8_STAAC	46.8	20.01	7	1	1	Y	24921	Uncharacterized protein OS=Staphylococcus aureus (strain COL) GN=SACOL0614 PE=4 SV=1
1200	1372	Q5HI21|Q5HI21_STAAC	81.8	20	5	1	1	Y	29496	Iron compound ABC transporter ATP-binding protein OS=Staphylococcus aureus (strain COL) GN=SACOL0704 PE=3 SV=1
